# Supplementary material for: Isoform switching as a key mechanism in chemotherapy resistance in triple-negative breast cancer
Source: Research Square preprint supplement (doi:10.21203/rs.3.rs-7041176/v1), 2025-07-23
Supplement: Supplementary file 1 [file 0d469eeb9c6efece25641fa6.xlsx]

## Sheet: Supplementary Table 1
Supplementary Table 1. The information for the RNA-seq libraries.
	Filtration			Human genome
sample	Number of raw pair-end reads	Reads that passed filtration	% of passed reads	Alignment rate [%]
3	31028739	30853962	0.994367	95.70%
4	26251846	26123203	0.9951	95.89%
6	22791555	22657112	0.994101	95.21%
8	25773512	25622684	0.994148	96.05%
9	24184162	24076215	0.995536	95.57%
10	23085960	23019278	0.997112	94.95%
15	18971464	18840852	0.993115	77.87%
16	19334223	19259739	0.996148	93.17%
23	16682691	16652443	0.998187	95.51%
26	16215933	16174701	0.997457	95.44%
27	15884767	15840610	0.99722	95.20%
29	18170845	18092265	0.995675	94.81%
30	13715013	13638195	0.994399	94.11%
31	17028104	16938201	0.99472	85.73%
284	40015319	39896124	0.997021	79.63%
285	37050907	36979001	0.998059	94.28%
286	27283723	27219977	0.997664	94.26%
287	25904477	25837148	0.997401	94.11%
288	44844182	44796295	0.998932	94.78%
289	39078430	38966231	0.997129	76.90%
290	50061315	49798801	0.994756	87.60%
291	34530964	34417410	0.996712	89.89%
292	42210496	42003805	0.995103	91.90%
293	37518216	37436686	0.997827	88.50%
294	27598982	27508258	0.996713	65.61%
1_new	38571472	38190530	0.990124	90.80%
10_new	30800839	30694025	0.996532	94.77%
11_new	38115317	37937553	0.995336	94.23%
12_new	36412325	36267030	0.99601	94.84%
13_new	23969849	23847826	0.994909	94.42%
14_new	10523642	10361188	0.984563	94.54%
15_new	40373010	40246751	0.996873	95.30%
16_new	36358094	36208063	0.995874	94.73%
18_new	7023347	6914333	0.984478	88.26%
19_new	8849871	8756860	0.98949	64.22%
2_new	40576479	39965234	0.984936	91.63%
20_new	11954246	11739682	0.982051	93.16%
22_new	9055235	8847212	0.977027	87.20%
24_new	2632714	2613872	0.992843	74.44%
25_new	8711664	8626146	0.990184	94.53%
26_new	10414603	10257316	0.984897	94.90%
27_new	9287534	9186230	0.989092	94.52%
28_new	8917185	8788771	0.985599	93.93%
3_new	7289138	7173444	0.984128	83.60%
4_new	37103774	36874289	0.993815	94.44%
5_new	29956708	29676326	0.99064	94.72%
6_new	36671086	36532469	0.99622	94.89%
7_new	31410293	31278134	0.995792	95.15%
8_new	37776088	37618060	0.995817	94.89%
9_new	33408859	33250966	0.995274	94.47%

## Sheet: Supplementary Table 2
Supplementary Table 2. Summary of significat isoform switching genes (q_value<0,05)
iso_ref	gene_ref	isoform_id	gene_id	gene_name	condition_1	condition_2	IF1	IF2	dIF	isoform_switch_q_value	switchConsequencesGene
isoComp_00044058	geneComp_00005494	ENST00000554974	ENSG00000126215	XRCC3	no	complete	0.278	0	-0.278	4.09295e-30	TRUE
isoComp_00075599	geneComp_00009812	ENST00000343687	ENSG00000160179	ABCG1	no	complete	0.645	0.02	-0.625	4.59367e-29	FALSE
isoComp_00120530	geneComp_00021135	ENST00000551631	ENSG00000224078	SNHG14	no	complete	0.264	0.017	-0.247	4.59367e-29	FALSE
isoComp_00033854	geneComp_00004053	ENST00000477393	ENSG00000114125	RNF7	no	complete	0.141	0.016	-0.125	2.34705e-24	TRUE
isoComp_00104195	geneComp_00014768	ENST00000624862	ENSG00000186654	PRR5	no	complete	0.238	0	-0.238	3.29975e-23	TRUE
isoComp_00079573	geneComp_00010433	ENST00000383811	ENSG00000163703	CRELD1	no	complete	0.321	0	-0.321	3.55047e-20	TRUE
isoComp_00146383	geneComp_00036647	ENST00000612051	ENSG00000269335	IKBKG	no	complete	0.411	0	-0.411	2.33477e-18	TRUE
isoComp_00066164	geneComp_00008446	ENST00000372418	ENSG00000147224	PRPS1	no	complete	0.208	0.003	-0.205	3.88777e-18	TRUE
isoComp_00061770	geneComp_00007796	ENST00000594968	ENSG00000142528	ZNF473	no	complete	0.422	0	-0.422	4.90052e-18	TRUE
isoComp_00094691	geneComp_00012849	ENST00000374633	ENSG00000175395	ZNF25	no	complete	0.475	0	-0.475	4.90052e-18	TRUE
isoComp_00022809	geneComp_00002672	ENST00000569604	ENSG00000103253	HAGHL	no	complete	0.308	0	-0.308	1.26479e-17	TRUE
isoComp_00155098	geneComp_00043581	ENST00000687837	ENSG00000288869	SMANTIS	no	complete	0.318	0	-0.318	1.68694e-17	TRUE
isoComp_00158765	geneComp_00045378	ENST00000458301	ENSG00000293510	AFG3L1P	no	complete	0.247	0	-0.247	1.71743e-17	FALSE
isoComp_00017525	geneComp_00001963	ENST00000337656	ENSG00000095794	CREM	no	complete	0.202	0	-0.202	4.84707e-17	TRUE
isoComp_00071657	geneComp_00009225	ENST00000681433	ENSG00000154743	TSEN2	no	complete	0.318	0	-0.318	4.84707e-17	NA
isoComp_00063027	geneComp_00007980	ENST00000648267	ENSG00000143612	C1orf43	no	complete	0.178	0.005	-0.173	2.21293e-16	TRUE
isoComp_00131644	geneComp_00027529	ENST00000468071	ENSG00000240857	RDH14	no	complete	0.217	0.005	-0.212	4.01292e-16	FALSE
isoComp_00041009	geneComp_00005011	ENST00000671952	ENSG00000122507	BBS9	no	complete	0.368	0.03	-0.339	4.17207e-16	TRUE
isoComp_00001943	geneComp_00000226	ENST00000435970	ENSG00000009413	REV3L	no	complete	0.278	0	-0.278	4.87887e-16	TRUE
isoComp_00063675	geneComp_00008070	ENST00000434566	ENSG00000144182	LIPT1	no	complete	0.273	0	-0.273	4.92587e-16	TRUE
isoComp_00036348	geneComp_00004347	ENST00000680832	ENSG00000116337	AMPD2	no	complete	0.26	0.001	-0.259	5.54269e-16	TRUE
isoComp_00023239	geneComp_00002731	ENST00000560717	ENSG00000103707	MTFMT	no	complete	0.277	0	-0.277	6.12271e-16	TRUE
isoComp_00061762	geneComp_00007794	ENST00000357375	ENSG00000142512	SIGLEC10	no	complete	0.371	0.013	-0.358	6.86913e-16	TRUE
isoComp_00034726	geneComp_00004153	ENST00000452780	ENSG00000115109	EPB41L5	no	complete	0.155	0.008	-0.147	1.28438e-15	TRUE
isoComp_00005427	geneComp_00000627	ENST00000637215	ENSG00000048740	CELF2	no	complete	0.213	0	-0.213	1.29551e-15	NA
isoComp_00079059	geneComp_00010361	ENST00000402259	ENSG00000163517	HDAC11	no	complete	0.281	0	-0.281	1.47052e-15	TRUE
isoComp_00094690	geneComp_00012849	ENST00000302609	ENSG00000175395	ZNF25	no	complete	0.525	0.996	0.471	1.67993e-15	TRUE
isoComp_00038409	geneComp_00004640	ENST00000539225	ENSG00000119139	TJP2	no	complete	0.292	0	-0.292	1.68197e-15	TRUE
isoComp_00084886	geneComp_00011274	ENST00000300589	ENSG00000167207	NOD2	no	complete	0.437	0	-0.437	1.83892e-15	TRUE
isoComp_00018064	geneComp_00002040	ENST00000414138	ENSG00000099849	RASSF7	no	complete	0.352	0.022	-0.33	3.11698e-15	TRUE
isoComp_00100537	geneComp_00014041	ENST00000545021	ENSG00000183060	LYSMD4	no	complete	0.409	0.001	-0.407	5.09976e-15	TRUE
isoComp_00078284	geneComp_00010220	ENST00000535944	ENSG00000162946	DISC1	no	complete	0.328	0	-0.328	5.28004e-15	TRUE
isoComp_00091107	geneComp_00012276	ENST00000470048	ENSG00000171962	DRC3	no	complete	0.417	0	-0.417	5.30939e-15	TRUE
isoComp_00063663	geneComp_00008067	ENST00000409450	ENSG00000144152	FBLN7	no	complete	0.465	0	-0.465	7.49315e-15	TRUE
isoComp_00104597	geneComp_00014858	ENST00000600094	ENSG00000187187	ZNF546	no	complete	0.31	0	-0.31	7.56745e-15	TRUE
isoComp_00080214	geneComp_00010524	ENST00000359079	ENSG00000164023	SGMS2	no	complete	0.379	0	-0.379	8.62367e-15	FALSE
isoComp_00013387	geneComp_00001495	ENST00000642462	ENSG00000081923	ATP8B1	no	complete	0.442	0.001	-0.441	9.00948e-15	TRUE
isoComp_00024924	geneComp_00002911	ENST00000600440	ENSG00000105137	SYDE1	no	complete	0.427	0.005	-0.422	2.67022e-14	TRUE
isoComp_00054768	geneComp_00006917	ENST00000614059	ENSG00000136643	RPS6KC1	no	complete	0.192	0.005	-0.187	3.19871e-14	FALSE
isoComp_00104132	geneComp_00014757	ENST00000691432	ENSG00000186594	MIR22HG	no	complete	0.368	0	-0.368	5.2404e-14	TRUE
isoComp_00033763	geneComp_00004045	ENST00000466072	ENSG00000114054	PCCB	no	complete	0.174	0	-0.174	5.93608e-14	TRUE
isoComp_00157526	geneComp_00044926	ENST00000692820	ENSG00000291137	GBAP1	no	complete	0.236	0.003	-0.232	6.1951e-14	TRUE
isoComp_00085139	geneComp_00011307	ENST00000496630	ENSG00000167393	PPP2R3B	no	complete	0.332	0	-0.332	7.16323e-14	TRUE
isoComp_00041182	geneComp_00005029	ENST00000651779	ENSG00000122644	ARL4A	no	complete	0.228	0.012	-0.216	7.93246e-14	FALSE
isoComp_00075385	geneComp_00009778	ENST00000448492	ENSG00000159873	CCDC117	no	complete	0.204	0	-0.204	9.24552e-14	FALSE
isoComp_00131643	geneComp_00027529	ENST00000381249	ENSG00000240857	RDH14	no	complete	0.783	0.995	0.212	9.28657e-14	FALSE
isoComp_00106885	geneComp_00015379	ENST00000527740	ENSG00000196378	ZNF34	no	complete	0.275	0	-0.275	9.43299e-14	TRUE
isoComp_00055615	geneComp_00007044	ENST00000676965	ENSG00000137275	RIPK1	no	complete	0.238	0.022	-0.216	1.00066e-13	TRUE
isoComp_00030628	geneComp_00003626	ENST00000682659	ENSG00000110711	AIP	no	complete	0.13	0.011	-0.119	1.01906e-13	TRUE
isoComp_00015165	geneComp_00001698	ENST00000649570	ENSG00000088035	ALG6	no	complete	0.192	0.011	-0.182	1.03175e-13	TRUE
isoComp_00042561	geneComp_00005247	ENST00000528387	ENSG00000124444	ZNF576	no	complete	0.356	0	-0.356	1.03175e-13	TRUE
isoComp_00069956	geneComp_00008966	ENST00000514838	ENSG00000152359	POC5	no	complete	0.372	0	-0.372	1.36488e-13	FALSE
isoComp_00107016	geneComp_00015406	ENST00000481179	ENSG00000196460	RFX8	no	complete	0.326	0	-0.326	1.36488e-13	TRUE
isoComp_00031587	geneComp_00003735	ENST00000551980	ENSG00000111647	BLTP3B	no	complete	0.144	0.008	-0.136	1.54675e-13	TRUE
isoComp_00014728	geneComp_00001655	ENST00000704026	ENSG00000087074	PPP1R15A	no	complete	0.152	0.009	-0.143	1.64603e-13	TRUE
isoComp_00079087	geneComp_00010365	ENST00000392089	ENSG00000163521	GLB1L	no	complete	0.5	0.039	-0.461	3.13094e-13	TRUE
isoComp_00008170	geneComp_00000936	ENST00000373552	ENSG00000066248	NGEF	no	complete	0.294	0.016	-0.278	3.95486e-13	TRUE
isoComp_00092441	geneComp_00012473	ENST00000380667	ENSG00000173068	BNC2	no	complete	0.382	0	-0.382	5.54072e-13	TRUE
isoComp_00002630	geneComp_00000301	ENST00000423698	ENSG00000012061	ERCC1	no	complete	0.236	0.004	-0.232	7.37617e-13	TRUE
isoComp_00070030	geneComp_00008983	ENST00000378201	ENSG00000152464	RPP38	no	complete	0.189	0.009	-0.181	1.02198e-12	TRUE
isoComp_00146661	geneComp_00036818	ENST00000688747	ENSG00000269985	FARS2-AS1	no	complete	0.141	0.009	-0.132	2.98364e-12	FALSE
isoComp_00064701	geneComp_00008212	ENST00000498875	ENSG00000145332	KLHL8	no	complete	0.242	0.023	-0.219	3.19438e-12	FALSE
isoComp_00093479	geneComp_00012653	ENST00000533024	ENSG00000174151	CYB561D1	no	complete	0.493	0.006	-0.488	3.5423e-12	TRUE
isoComp_00077189	geneComp_00010029	ENST00000584798	ENSG00000161960	EIF4A1	no	complete	0.221	0.113	-0.108	3.77763e-12	TRUE
isoComp_00020004	geneComp_00002288	ENST00000340738	ENSG00000100767	PAPLN	no	complete	0.219	0	-0.219	4.74826e-12	NA
isoComp_00021402	geneComp_00002483	ENST00000699778	ENSG00000101901	ALG13	no	complete	0.321	0.004	-0.316	5.26702e-12	TRUE
isoComp_00113210	geneComp_00017441	ENST00000488276	ENSG00000204161	TMEM273	no	complete	0.293	0.004	-0.289	7.93052e-12	TRUE
isoComp_00057621	geneComp_00007299	ENST00000693334	ENSG00000138688	BLTP1	no	complete	0.137	0.037	-0.1	1.12758e-11	TRUE
isoComp_00090106	geneComp_00012094	ENST00000495408	ENSG00000171130	ATP6V0E2	no	complete	0.427	0.003	-0.424	1.43881e-11	TRUE
isoComp_00065012	geneComp_00008258	ENST00000613674	ENSG00000145725	PPIP5K2	no	complete	0.322	0	-0.322	1.8195e-11	TRUE
isoComp_00095366	geneComp_00012995	ENST00000398154	ENSG00000176358	TAC4	no	complete	0.495	0	-0.495	1.8195e-11	TRUE
isoComp_00133694	geneComp_00028645	ENST00000652311	ENSG00000245164	LINC00861	no	complete	0.124	0.002	-0.122	2.17697e-11	FALSE
isoComp_00082013	geneComp_00010839	ENST00000468781	ENSG00000165233	CARD19	no	complete	0.199	0.013	-0.186	3.97528e-11	TRUE
isoComp_00022307	geneComp_00002621	ENST00000695711	ENSG00000102977	ACD	no	complete	0.423	0.007	-0.417	4.43081e-11	TRUE
isoComp_00081828	geneComp_00010798	ENST00000356838	ENSG00000165071	TMEM71	no	complete	0.244	0.026	-0.218	5.15726e-11	FALSE
isoComp_00081976	geneComp_00010832	ENST00000638131	ENSG00000165195	PIGA	no	complete	0.275	0.004	-0.271	5.31559e-11	TRUE
isoComp_00129429	geneComp_00026176	ENST00000609615	ENSG00000236581	STARD13-AS	no	complete	0.181	0.013	-0.167	6.02086e-11	TRUE
isoComp_00014662	geneComp_00001649	ENST00000535142	ENSG00000086827	ZW10	no	complete	0.179	0.02	-0.16	7.7686e-11	FALSE
isoComp_00059464	geneComp_00007542	ENST00000566479	ENSG00000140474	ULK3	no	complete	0.149	0.012	-0.137	7.7686e-11	TRUE
isoComp_00100681	geneComp_00014079	ENST00000512334	ENSG00000183258	DDX41	no	complete	0.288	0.003	-0.285	7.7686e-11	TRUE
isoComp_00063761	geneComp_00008085	ENST00000409673	ENSG00000144306	SCRN3	no	complete	0.155	0.006	-0.149	8.29346e-11	TRUE
isoComp_00079861	geneComp_00010478	ENST00000490290	ENSG00000163870	TPRA1	no	complete	0.216	0.004	-0.212	8.35791e-11	TRUE
isoComp_00062806	geneComp_00007953	ENST00000440600	ENSG00000143493	INTS7	no	complete	0.178	0.007	-0.171	1.19732e-10	TRUE
isoComp_00099021	geneComp_00013771	ENST00000490730	ENSG00000181392	SYNE4	no	complete	0.419	0.041	-0.378	1.42101e-10	TRUE
isoComp_00019305	geneComp_00002203	ENST00000698891	ENSG00000100385	IL2RB	no	complete	0.473	0	-0.473	1.48251e-10	TRUE
isoComp_00039112	geneComp_00004731	ENST00000420552	ENSG00000119862	LGALSL	no	complete	0.636	0.012	-0.624	1.65485e-10	TRUE
isoComp_00011428	geneComp_00001276	ENST00000482456	ENSG00000075826	SEC31B	no	complete	0.267	0.002	-0.265	2.29806e-10	TRUE
isoComp_00069442	geneComp_00008878	ENST00000511528	ENSG00000151623	NR3C2	no	complete	0.345	0.003	-0.341	2.55648e-10	TRUE
isoComp_00045330	geneComp_00005661	ENST00000406735	ENSG00000127989	MTERF1	no	complete	0.26	0.026	-0.233	2.82465e-10	TRUE
isoComp_00017379	geneComp_00001941	ENST00000223423	ENSG00000095303	PTGS1	no	complete	0.152	0.002	-0.15	3.13977e-10	TRUE
isoComp_00157029	geneComp_00044857	ENST00000685456	ENSG00000291064	RPL23AP7	no	complete	0.277	0	-0.277	4.02618e-10	TRUE
isoComp_00146660	geneComp_00036818	ENST00000602674	ENSG00000269985	FARS2-AS1	no	complete	0.859	0.983	0.125	4.36362e-10	FALSE
isoComp_00045643	geneComp_00005713	ENST00000393329	ENSG00000128513	POT1	no	complete	0.258	0.023	-0.235	4.57993e-10	TRUE
isoComp_00041360	geneComp_00005066	ENST00000676833	ENSG00000122966	CIT	no	complete	0.178	0.015	-0.163	6.32239e-10	NA
isoComp_00008584	geneComp_00000979	ENST00000474933	ENSG00000067445	TRO	no	complete	0.274	0	-0.274	7.40233e-10	TRUE
isoComp_00034023	geneComp_00004073	ENST00000429366	ENSG00000114388	NPRL2	no	complete	0.144	0.007	-0.138	1.66069e-09	TRUE
isoComp_00002733	geneComp_00000312	ENST00000555329	ENSG00000012963	UBR7	no	complete	0.178	0	-0.178	1.99535e-09	TRUE
isoComp_00008579	geneComp_00000979	ENST00000442098	ENSG00000067445	TRO	no	complete	0.225	0	-0.225	2.12724e-09	TRUE
isoComp_00107015	geneComp_00015406	ENST00000428343	ENSG00000196460	RFX8	no	complete	0.484	0.037	-0.447	2.83794e-09	TRUE
isoComp_00088365	geneComp_00011772	ENST00000522434	ENSG00000169490	TM2D2	no	complete	0.144	0.006	-0.138	3.9226e-09	NA
isoComp_00038338	geneComp_00004625	ENST00000626491	ENSG00000118961	LDAH	no	complete	0.415	0.006	-0.409	4.10736e-09	TRUE
isoComp_00027113	geneComp_00003189	ENST00000698983	ENSG00000106628	POLD2	no	complete	0.116	0.008	-0.108	4.16541e-09	NA
isoComp_00068185	geneComp_00008703	ENST00000524427	ENSG00000149557	FEZ1	no	complete	0.502	0.062	-0.439	6.73347e-09	FALSE
isoComp_00016676	geneComp_00001876	ENST00000555219	ENSG00000092020	PPP2R3C	no	complete	0.199	0.018	-0.182	8.4904e-09	TRUE
isoComp_00014661	geneComp_00001649	ENST00000200135	ENSG00000086827	ZW10	no	complete	0.821	0.98	0.16	8.80836e-09	FALSE
isoComp_00001014	geneComp_00000113	ENST00000598375	ENSG00000006015	REX1BD	no	complete	0.135	0.013	-0.123	1.00763e-08	TRUE
isoComp_00035580	geneComp_00004255	ENST00000475696	ENSG00000115661	STK16	no	complete	0.367	0.04	-0.326	1.0747e-08	TRUE
isoComp_00152873	geneComp_00041810	ENST00000431044	ENSG00000284874	NA	no	complete	0.359	0.077	-0.282	1.15208e-08	TRUE
isoComp_00091719	geneComp_00012379	ENST00000526034	ENSG00000172543	CTSW	no	complete	0.475	0	-0.475	1.17948e-08	TRUE
isoComp_00088232	geneComp_00011751	ENST00000550030	ENSG00000169372	CRADD	no	complete	0.215	0.011	-0.205	1.80209e-08	TRUE
isoComp_00143312	geneComp_00034537	ENST00000572898	ENSG00000262246	CORO7	no	complete	0.232	0.007	-0.225	1.80209e-08	FALSE
isoComp_00067519	geneComp_00008622	ENST00000693184	ENSG00000148835	TAF5	no	complete	0.561	0.012	-0.549	2.53088e-08	TRUE
isoComp_00093258	geneComp_00012612	ENST00000514112	ENSG00000173868	PHOSPHO1	no	complete	0.43	0	-0.43	2.53088e-08	FALSE
isoComp_00088154	geneComp_00011737	ENST00000650695	ENSG00000169255	B3GALNT1	no	complete	0.297	0	-0.297	2.69071e-08	TRUE
isoComp_00030805	geneComp_00003643	ENST00000539028	ENSG00000110852	CLEC2B	no	complete	0.283	0.028	-0.255	3.00091e-08	TRUE
isoComp_00119639	geneComp_00020541	ENST00000464114	ENSG00000222009	BTBD19	no	complete	0.276	0.008	-0.268	3.40892e-08	TRUE
isoComp_00075245	geneComp_00009759	ENST00000515867	ENSG00000159685	CHCHD6	no	complete	0.297	0.032	-0.265	3.52838e-08	TRUE
isoComp_00013955	geneComp_00001558	ENST00000614549	ENSG00000084070	SMAP2	no	complete	0.248	0.034	-0.213	3.87304e-08	FALSE
isoComp_00075206	geneComp_00009755	ENST00000582678	ENSG00000159640	ACE	no	complete	0.189	0.078	-0.111	4.32141e-08	TRUE
isoComp_00108726	geneComp_00015672	ENST00000561857	ENSG00000197471	SPN	no	complete	0.203	0.011	-0.192	4.32141e-08	TRUE
isoComp_00005465	geneComp_00000632	ENST00000675042	ENSG00000049167	ERCC8	no	complete	0.253	0	-0.253	4.85119e-08	TRUE
isoComp_00109336	geneComp_00015775	ENST00000406434	ENSG00000197872	CYRIA	no	complete	0.229	0.049	-0.18	4.85119e-08	FALSE
isoComp_00076539	geneComp_00009941	ENST00000488996	ENSG00000160991	ORAI2	no	complete	0.423	0.021	-0.402	5.22941e-08	TRUE
isoComp_00075675	geneComp_00009824	ENST00000359624	ENSG00000160200	CBS	no	complete	0.345	0.052	-0.294	5.47931e-08	TRUE
isoComp_00097904	geneComp_00013501	ENST00000569086	ENSG00000179588	ZFPM1	no	complete	0.286	0.009	-0.277	7.09358e-08	TRUE
isoComp_00017678	geneComp_00001986	ENST00000518614	ENSG00000096872	IFT74	no	complete	0.169	0.007	-0.162	7.73667e-08	TRUE
isoComp_00105963	geneComp_00015204	ENST00000536254	ENSG00000189042	ZNF567	no	complete	0.172	0.01	-0.162	8.27832e-08	TRUE
isoComp_00012693	geneComp_00001412	ENST00000549595	ENSG00000079387	SENP1	no	complete	0.287	0.007	-0.279	9.12375e-08	FALSE
isoComp_00119136	geneComp_00020250	ENST00000682710	ENSG00000219545	UMAD1	no	complete	0.332	0.004	-0.328	9.15242e-08	TRUE
isoComp_00045560	geneComp_00005704	ENST00000488758	ENSG00000128383	APOBEC3A	no	complete	0.198	0.036	-0.162	9.16588e-08	TRUE
isoComp_00089634	geneComp_00012003	ENST00000323735	ENSG00000170632	ARMC10	no	complete	0.173	0.027	-0.146	9.48498e-08	TRUE
isoComp_00076103	geneComp_00009884	ENST00000581236	ENSG00000160606	TLCD1	no	complete	0.199	0.01	-0.189	1.09207e-07	TRUE
isoComp_00089733	geneComp_00012024	ENST00000518169	ENSG00000170791	CHCHD7	no	complete	0.179	0.005	-0.174	1.59427e-07	TRUE
isoComp_00071217	geneComp_00009160	ENST00000683539	ENSG00000154153	RETREG1	no	complete	0.19	0.012	-0.178	2.02373e-07	TRUE
isoComp_00069361	geneComp_00008868	ENST00000693576	ENSG00000151503	NCAPD3	no	complete	0.129	0.011	-0.117	2.08353e-07	TRUE
isoComp_00001704	geneComp_00000207	ENST00000011684	ENSG00000008323	PLEKHG6	no	complete	0.29	0.01	-0.28	3.1442e-07	TRUE
isoComp_00063439	geneComp_00008033	ENST00000406175	ENSG00000143924	EML4	no	complete	0.19	0.067	-0.123	3.73274e-07	TRUE
isoComp_00025962	geneComp_00003046	ENST00000599885	ENSG00000105750	ZNF85	no	complete	0.233	0.003	-0.23	4.91386e-07	TRUE
isoComp_00111117	geneComp_00016070	ENST00000480740	ENSG00000198843	SELENOT	no	complete	0.326	0.021	-0.304	4.96438e-07	TRUE
isoComp_00053430	geneComp_00006734	ENST00000409651	ENSG00000135636	DYSF	no	complete	0.387	0.07	-0.317	5.05895e-07	FALSE
isoComp_00114901	geneComp_00017798	ENST00000590818	ENSG00000205744	DENND1C	no	complete	0.434	0.025	-0.409	5.08305e-07	TRUE
isoComp_00005937	geneComp_00000676	ENST00000706619	ENSG00000052126	PLEKHA5	no	complete	0.159	0.018	-0.141	5.31049e-07	TRUE
isoComp_00037937	geneComp_00004572	ENST00000354454	ENSG00000118308	IRAG2	no	complete	0.399	0.082	-0.317	5.90061e-07	TRUE
isoComp_00022109	geneComp_00002598	ENST00000520833	ENSG00000102878	HSF4	no	complete	0.164	0.004	-0.16	6.55486e-07	NA
isoComp_00060678	geneComp_00007664	ENST00000269195	ENSG00000141429	GALNT1	no	complete	0.462	0.762	0.3	6.9808e-07	TRUE
isoComp_00110071	geneComp_00015896	ENST00000698652	ENSG00000198286	CARD11	no	complete	0.163	0.026	-0.138	7.55445e-07	FALSE
isoComp_00091050	geneComp_00012266	ENST00000474847	ENSG00000171914	TLN2	no	complete	0.149	0.002	-0.147	7.88924e-07	TRUE
isoComp_00152874	geneComp_00041810	ENST00000455843	ENSG00000284874	NA	no	complete	0.641	0.923	0.282	8.01397e-07	TRUE
isoComp_00020352	geneComp_00002320	ENST00000555802	ENSG00000100968	NFATC4	no	complete	0.205	0.005	-0.2	8.12579e-07	TRUE
isoComp_00048038	geneComp_00006043	ENST00000391746	ENSG00000131042	LILRB2	no	complete	0.165	0.012	-0.153	8.18053e-07	TRUE
isoComp_00088541	geneComp_00011802	ENST00000581482	ENSG00000169660	HEXD	no	complete	0.135	0.006	-0.13	8.18053e-07	TRUE
isoComp_00020727	geneComp_00002378	ENST00000344256	ENSG00000101224	CDC25B	no	complete	0.299	0.053	-0.246	8.38206e-07	FALSE
isoComp_00072086	geneComp_00009289	ENST00000691604	ENSG00000155393	HEATR3	no	complete	0.304	0.005	-0.3	8.38206e-07	TRUE
isoComp_00107569	geneComp_00015476	ENST00000648179	ENSG00000196715	VKORC1L1	no	complete	0.762	0.42	-0.343	8.38206e-07	TRUE
isoComp_00074567	geneComp_00009667	ENST00000381470	ENSG00000158856	DMTN	no	complete	0.191	0.006	-0.185	8.73465e-07	FALSE
isoComp_00157168	geneComp_00044876	ENST00000700784	ENSG00000291084	ALOX12P2	no	complete	0.135	0.013	-0.122	8.90285e-07	FALSE
isoComp_00071375	geneComp_00009183	ENST00000357327	ENSG00000154310	TNIK	no	complete	0.159	0.027	-0.132	8.94616e-07	TRUE
isoComp_00084145	geneComp_00011160	ENST00000561139	ENSG00000166710	B2M	no	complete	0.554	0.392	-0.163	9.75965e-07	TRUE
isoComp_00118740	geneComp_00019965	ENST00000453341	ENSG00000215788	TNFRSF25	no	complete	0.392	0.052	-0.34	1.02708e-06	TRUE
isoComp_00102567	geneComp_00014472	ENST00000525188	ENSG00000185238	PRMT3	no	complete	0.146	0.001	-0.145	1.04854e-06	TRUE
isoComp_00032416	geneComp_00003872	ENST00000638262	ENSG00000112425	EPM2A	no	complete	0.471	0.013	-0.458	1.06407e-06	TRUE
isoComp_00050040	geneComp_00006293	ENST00000476789	ENSG00000132781	MUTYH	no	complete	0.243	0.019	-0.224	1.06407e-06	TRUE
isoComp_00098501	geneComp_00013638	ENST00000642959	ENSG00000180488	MIGA1	no	complete	0.334	0	-0.334	1.06407e-06	TRUE
isoComp_00118318	geneComp_00019850	ENST00000504270	ENSG00000215039	CD27-AS1	no	complete	0.238	0.014	-0.224	1.15189e-06	NA
isoComp_00026770	geneComp_00003147	ENST00000648462	ENSG00000106348	IMPDH1	no	complete	0.173	0.01	-0.162	1.23731e-06	FALSE
isoComp_00041713	geneComp_00005106	ENST00000394824	ENSG00000123358	NR4A1	no	complete	0.584	0.015	-0.568	1.41011e-06	TRUE
isoComp_00032446	geneComp_00003876	ENST00000374512	ENSG00000112511	PHF1	no	complete	0.258	0.021	-0.238	1.44077e-06	TRUE
isoComp_00135957	geneComp_00029689	ENST00000523865	ENSG00000250479	CHCHD10	no	complete	0.689	0.256	-0.432	1.54559e-06	TRUE
isoComp_00016492	geneComp_00001854	ENST00000409176	ENSG00000091436	MAP3K20	no	complete	0.311	0.015	-0.296	1.57466e-06	TRUE
isoComp_00044151	geneComp_00005505	ENST00000588161	ENSG00000126254	RBM42	no	complete	0.439	0.006	-0.433	1.57466e-06	FALSE
isoComp_00113340	geneComp_00017469	ENST00000374866	ENSG00000204262	COL5A2	no	complete	0.806	0.949	0.143	1.57466e-06	TRUE
isoComp_00075756	geneComp_00009832	ENST00000479117	ENSG00000160216	AGPAT3	no	complete	0.26	0.067	-0.193	1.65755e-06	TRUE
isoComp_00037173	geneComp_00004465	ENST00000437324	ENSG00000117280	RAB29	no	complete	0.17	0.01	-0.16	1.82278e-06	TRUE
isoComp_00062231	geneComp_00007875	ENST00000367843	ENSG00000143164	DCAF6	no	complete	0.357	0.173	-0.184	1.82324e-06	FALSE
isoComp_00133803	geneComp_00028671	ENST00000666750	ENSG00000245648	KLRK1-AS1	no	complete	0.271	0.07	-0.201	2.04265e-06	FALSE
isoComp_00010802	geneComp_00001211	ENST00000673233	ENSG00000074266	EED	no	complete	0.136	0.014	-0.121	2.32406e-06	TRUE
isoComp_00040630	geneComp_00004964	ENST00000417450	ENSG00000121964	GTDC1	no	complete	0.218	0.011	-0.207	2.41942e-06	TRUE
isoComp_00120607	geneComp_00021170	ENST00000421842	ENSG00000224165	DNAJC27-AS1	no	complete	0.644	0.038	-0.607	2.51728e-06	FALSE
isoComp_00107273	geneComp_00015436	ENST00000686599	ENSG00000196569	LAMA2	no	complete	0.222	0.028	-0.194	2.60037e-06	FALSE
isoComp_00008212	geneComp_00000941	ENST00000376785	ENSG00000066379	POLR1H	no	complete	0.269	0.008	-0.261	2.65525e-06	TRUE
isoComp_00000963	geneComp_00000106	ENST00000503614	ENSG00000005882	PDK2	no	complete	0.241	0.01	-0.231	2.77315e-06	TRUE
isoComp_00028364	geneComp_00003358	ENST00000577716	ENSG00000108375	RNF43	no	complete	0.473	0.013	-0.459	2.80386e-06	TRUE
isoComp_00032449	geneComp_00003876	ENST00000486845	ENSG00000112511	PHF1	no	complete	0.213	0.083	-0.13	2.80386e-06	TRUE
isoComp_00079677	geneComp_00010442	ENST00000490698	ENSG00000163738	MTHFD2L	no	complete	0.305	0.003	-0.302	2.80862e-06	TRUE
isoComp_00101465	geneComp_00014255	ENST00000535883	ENSG00000184154	LRRC51	no	complete	0.191	0.006	-0.184	2.84348e-06	TRUE
isoComp_00065646	geneComp_00008366	ENST00000491163	ENSG00000146540	C7orf50	no	complete	0.168	0.012	-0.156	3.24558e-06	NA
isoComp_00085143	geneComp_00011308	ENST00000535577	ENSG00000167394	ZNF668	no	complete	0.26	0.005	-0.255	3.25293e-06	TRUE
isoComp_00102078	geneComp_00014373	ENST00000684558	ENSG00000184752	NDUFA12	no	complete	0.248	0.052	-0.196	3.44778e-06	TRUE
isoComp_00139859	geneComp_00032269	ENST00000535817	ENSG00000256690	STX5-DT	no	complete	0.5	0.024	-0.476	3.44778e-06	FALSE
isoComp_00028939	geneComp_00003422	ENST00000592454	ENSG00000108784	NAGLU	no	complete	0.224	0.005	-0.219	3.78977e-06	TRUE
isoComp_00061656	geneComp_00007776	ENST00000391951	ENSG00000142252	GEMIN7	no	complete	0.698	0.026	-0.672	4.02002e-06	TRUE
isoComp_00032967	geneComp_00003936	ENST00000523654	ENSG00000113048	MRPS27	no	complete	0.141	0.013	-0.127	4.05653e-06	TRUE
isoComp_00122196	geneComp_00022084	ENST00000659502	ENSG00000226383	LINC01876	no	complete	0.406	0.008	-0.398	4.47759e-06	FALSE
isoComp_00074091	geneComp_00009584	ENST00000675282	ENSG00000158156	XKR8	no	complete	0.256	0.007	-0.249	4.54797e-06	TRUE
isoComp_00080176	geneComp_00010519	ENST00000471429	ENSG00000164002	EXO5	no	complete	0.283	0.012	-0.271	4.92878e-06	TRUE
isoComp_00058363	geneComp_00007400	ENST00000546672	ENSG00000139410	SDSL	no	complete	0.43	0.013	-0.416	5.75124e-06	TRUE
isoComp_00116728	geneComp_00019233	ENST00000367396	ENSG00000213047	DENND1B	no	complete	0.178	0.003	-0.175	5.9053e-06	FALSE
isoComp_00005670	geneComp_00000649	ENST00000511181	ENSG00000049860	HEXB	no	complete	0.362	0.105	-0.257	6.18311e-06	TRUE
isoComp_00141326	geneComp_00033217	ENST00000558831	ENSG00000259248	USP3-AS1	no	complete	0.345	0.009	-0.336	6.18448e-06	FALSE
isoComp_00048041	geneComp_00006043	ENST00000434421	ENSG00000131042	LILRB2	no	complete	0.408	0.088	-0.32	6.30117e-06	TRUE
isoComp_00113342	geneComp_00017469	ENST00000618828	ENSG00000204262	COL5A2	no	complete	0.176	0.028	-0.148	6.48535e-06	TRUE
isoComp_00091546	geneComp_00012351	ENST00000575894	ENSG00000172366	MCRIP2	no	complete	0.848	0.389	-0.459	6.59563e-06	TRUE
isoComp_00011764	geneComp_00001313	ENST00000397981	ENSG00000076984	MAP2K7	no	complete	0.312	0.111	-0.201	6.60563e-06	FALSE
isoComp_00033235	geneComp_00003980	ENST00000395266	ENSG00000113396	SLC27A6	no	complete	0.459	0.191	-0.269	6.69013e-06	TRUE
isoComp_00092494	geneComp_00012483	ENST00000526833	ENSG00000173137	ADCK5	no	complete	0.189	0.013	-0.176	7.33225e-06	TRUE
isoComp_00127809	geneComp_00025316	ENST00000355095	ENSG00000234444	ZNF736	no	complete	0.419	0.008	-0.411	7.53358e-06	TRUE
isoComp_00110948	geneComp_00016047	ENST00000697614	ENSG00000198805	PNP	no	complete	0.218	0.003	-0.215	8.46584e-06	TRUE
isoComp_00044965	geneComp_00005618	ENST00000594975	ENSG00000127527	EPS15L1	no	complete	0.228	0.012	-0.216	9.53269e-06	TRUE
isoComp_00114388	geneComp_00017679	ENST00000587436	ENSG00000205045	SLFN12L	no	complete	0.239	0.047	-0.192	9.67817e-06	TRUE
isoComp_00129607	geneComp_00026284	ENST00000414554	ENSG00000236859	NIFK-AS1	no	complete	0.468	0.039	-0.429	1.01672e-05	TRUE
isoComp_00044411	geneComp_00005542	ENST00000485641	ENSG00000126756	UXT	no	complete	0.127	0.009	-0.119	1.02501e-05	TRUE
isoComp_00084203	geneComp_00011168	ENST00000472960	ENSG00000166762	CATSPER2	no	complete	0.468	0.01	-0.458	1.04383e-05	TRUE
isoComp_00102736	geneComp_00014501	ENST00000678658	ENSG00000185359	HGS	no	complete	0.331	0.161	-0.17	1.10181e-05	TRUE
isoComp_00075985	geneComp_00009865	ENST00000373281	ENSG00000160404	TOR2A	no	complete	0.5	0.038	-0.462	1.14627e-05	TRUE
isoComp_00128663	geneComp_00025745	ENST00000659935	ENSG00000235501	CNN3-DT	no	complete	0.367	0.035	-0.331	1.37617e-05	FALSE
isoComp_00033015	geneComp_00003944	ENST00000520687	ENSG00000113140	SPARC	no	complete	0.295	0.026	-0.269	1.63286e-05	TRUE
isoComp_00089665	geneComp_00012006	ENST00000395829	ENSG00000170638	TRABD	no	complete	0.376	0.019	-0.358	1.68111e-05	TRUE
isoComp_00109691	geneComp_00015827	ENST00000518389	ENSG00000198042	MAK16	no	complete	0.328	0.024	-0.304	1.69027e-05	TRUE
isoComp_00053541	geneComp_00006750	ENST00000569068	ENSG00000135736	CCDC102A	no	complete	0.241	0.033	-0.208	1.70911e-05	TRUE
isoComp_00052646	geneComp_00006638	ENST00000543318	ENSG00000135124	P2RX4	no	complete	0.122	0.008	-0.114	1.71665e-05	NA
isoComp_00060862	geneComp_00007685	ENST00000576241	ENSG00000141519	CCDC40	no	complete	0.236	0.007	-0.228	1.87687e-05	TRUE
isoComp_00052314	geneComp_00006597	ENST00000490317	ENSG00000134897	BIVM	no	complete	0.374	0.222	-0.152	1.89033e-05	TRUE
isoComp_00121114	geneComp_00021466	ENST00000577158	ENSG00000224877	NDUFAF8	no	complete	0.142	0.013	-0.128	1.99774e-05	TRUE
isoComp_00011788	geneComp_00001318	ENST00000458646	ENSG00000077092	RARB	no	complete	0.236	0.009	-0.227	2.00127e-05	TRUE
isoComp_00051177	geneComp_00006448	ENST00000520110	ENSG00000134014	ELP3	no	complete	0.158	0.052	-0.105	2.06311e-05	NA
isoComp_00048812	geneComp_00006139	ENST00000585269	ENSG00000131748	STARD3	no	complete	0.13	0.005	-0.125	2.27493e-05	TRUE
isoComp_00135479	geneComp_00029437	ENST00000513899	ENSG00000249835	VCAN-AS1	no	complete	0.239	0.003	-0.236	2.34778e-05	FALSE
isoComp_00032728	geneComp_00003907	ENST00000652680	ENSG00000112759	SLC29A1	no	complete	0.309	0.106	-0.203	2.4117e-05	FALSE
isoComp_00128643	geneComp_00025734	ENST00000454429	ENSG00000235481	UBE2R2-AS1	no	complete	0.432	0.045	-0.386	2.50776e-05	FALSE
isoComp_00056718	geneComp_00007183	ENST00000462426	ENSG00000138036	DYNC2LI1	no	complete	0.229	0.004	-0.225	2.54813e-05	TRUE
isoComp_00049058	geneComp_00006172	ENST00000587296	ENSG00000132004	FBXW9	no	complete	0.505	0.048	-0.457	2.64133e-05	TRUE
isoComp_00095495	geneComp_00013024	ENST00000598849	ENSG00000176531	PHLDB3	no	complete	0.208	0.011	-0.196	3.11142e-05	TRUE
isoComp_00147651	geneComp_00037657	ENST00000606761	ENSG00000272142	LYRM4-AS1	no	complete	0.224	0.01	-0.214	3.11142e-05	FALSE
isoComp_00042833	geneComp_00005304	ENST00000648867	ENSG00000124786	SLC35B3	no	complete	0.18	0.023	-0.157	3.42141e-05	TRUE
isoComp_00156667	geneComp_00044727	ENST00000621798	ENSG00000290867	LINC01145	no	complete	0.197	0.026	-0.171	3.8494e-05	FALSE
isoComp_00080312	geneComp_00010539	ENST00000635464	ENSG00000164053	ATRIP	no	complete	0.528	0.066	-0.462	3.85163e-05	TRUE
isoComp_00044122	geneComp_00005502	ENST00000588992	ENSG00000126246	IGFLR1	no	complete	0.315	0.016	-0.298	4.17184e-05	TRUE
isoComp_00043831	geneComp_00005467	ENST00000246174	ENSG00000125962	ARMCX5	no	complete	0.319	0.029	-0.291	4.33286e-05	TRUE
isoComp_00047220	geneComp_00005937	ENST00000597512	ENSG00000130475	FCHO1	no	complete	0.298	0.011	-0.286	4.51487e-05	NA
isoComp_00109335	geneComp_00015775	ENST00000381323	ENSG00000197872	CYRIA	no	complete	0.698	0.852	0.154	4.68733e-05	FALSE
isoComp_00074065	geneComp_00009577	ENST00000478862	ENSG00000158092	NCK1	no	complete	0.195	0.067	-0.128	4.73993e-05	TRUE
isoComp_00155069	geneComp_00043555	ENST00000686193	ENSG00000288838	NA	no	complete	0.855	0.492	-0.363	4.77032e-05	FALSE
isoComp_00006408	geneComp_00000731	ENST00000448244	ENSG00000055950	MRPL43	no	complete	0.159	0.015	-0.144	4.88259e-05	TRUE
isoComp_00119627	geneComp_00020537	ENST00000442455	ENSG00000221994	ZNF630	no	complete	0.725	0.051	-0.673	4.89919e-05	TRUE
isoComp_00135343	geneComp_00029375	ENST00000507702	ENSG00000249673	NOP14-AS1	no	complete	0.288	0.023	-0.265	5.14282e-05	TRUE
isoComp_00095668	geneComp_00013068	ENST00000571814	ENSG00000176845	METRNL	no	complete	0.5	0.209	-0.291	5.39072e-05	TRUE
isoComp_00031059	geneComp_00003673	ENST00000397196	ENSG00000111186	WNT5B	no	complete	0.428	0.046	-0.382	5.3944e-05	TRUE
isoComp_00052449	geneComp_00006610	ENST00000507379	ENSG00000134982	APC	no	complete	0.209	0.007	-0.202	5.66818e-05	TRUE
isoComp_00094121	geneComp_00012766	ENST00000350527	ENSG00000174938	SEZ6L2	no	complete	0.497	0.005	-0.492	5.766e-05	TRUE
isoComp_00097463	geneComp_00013399	ENST00000681400	ENSG00000178974	FBXO34	no	complete	0.483	0.027	-0.456	5.84682e-05	FALSE
isoComp_00099066	geneComp_00013784	ENST00000586346	ENSG00000181513	ACBD4	no	complete	0.242	0.023	-0.219	5.85751e-05	TRUE
isoComp_00017364	geneComp_00001937	ENST00000359415	ENSG00000095139	ARCN1	no	complete	0.238	0.063	-0.175	6.02684e-05	FALSE
isoComp_00134254	geneComp_00028786	ENST00000676800	ENSG00000247596	TWF2	no	complete	0.243	0.045	-0.198	6.02684e-05	TRUE
isoComp_00098625	geneComp_00013689	ENST00000436821	ENSG00000180855	ZNF443	no	complete	0.5	0.003	-0.497	6.56749e-05	TRUE
isoComp_00042253	geneComp_00005196	ENST00000685551	ENSG00000124181	PLCG1	no	complete	0.346	0.094	-0.253	6.79737e-05	FALSE
isoComp_00023575	geneComp_00002767	ENST00000620867	ENSG00000104177	MYEF2	no	complete	0.2	0.012	-0.188	7.12345e-05	FALSE
isoComp_00067147	geneComp_00008569	ENST00000483807	ENSG00000148362	PAXX	no	complete	0.179	0.009	-0.17	7.2581e-05	TRUE
isoComp_00140763	geneComp_00032836	ENST00000666503	ENSG00000258526	NA	no	complete	0.184	0.05	-0.134	7.28914e-05	FALSE
isoComp_00157806	geneComp_00044969	ENST00000562902	ENSG00000291188	NA	no	complete	0.189	0.065	-0.124	7.4139e-05	FALSE
isoComp_00096201	geneComp_00013165	ENST00000549253	ENSG00000177426	TGIF1	no	complete	0.184	0.008	-0.176	7.73165e-05	TRUE
isoComp_00065006	geneComp_00008258	ENST00000507921	ENSG00000145725	PPIP5K2	no	complete	0.304	0.033	-0.271	7.9474e-05	TRUE
isoComp_00017728	geneComp_00001997	ENST00000707119	ENSG00000099204	ABLIM1	no	complete	0.769	0.119	-0.65	8.08908e-05	TRUE
isoComp_00020737	geneComp_00002380	ENST00000432261	ENSG00000101236	RNF24	no	complete	0.395	0.146	-0.249	8.59029e-05	TRUE
isoComp_00042433	geneComp_00005231	ENST00000485377	ENSG00000124313	IQSEC2	no	complete	0.17	0.016	-0.154	8.60373e-05	TRUE
isoComp_00093695	geneComp_00012689	ENST00000611835	ENSG00000174428	GTF2IRD2B	no	complete	0.207	0.089	-0.118	9.17141e-05	TRUE
isoComp_00078251	geneComp_00010215	ENST00000430495	ENSG00000162927	PUS10	no	complete	0.166	0.012	-0.154	9.77036e-05	TRUE
isoComp_00083216	geneComp_00011034	ENST00000454524	ENSG00000166169	POLL	no	complete	0.219	0.013	-0.206	0.000103528	TRUE
isoComp_00004783	geneComp_00000551	ENST00000673669	ENSG00000040531	CTNS	no	complete	0.299	0.01	-0.289	0.000105275	TRUE
isoComp_00040180	geneComp_00004895	ENST00000504860	ENSG00000121211	MND1	no	complete	0.921	0.041	-0.88	0.000105275	TRUE
isoComp_00139860	geneComp_00032269	ENST00000535867	ENSG00000256690	STX5-DT	no	complete	0.5	0.976	0.476	0.000105275	FALSE
isoComp_00139567	geneComp_00032097	ENST00000473127	ENSG00000256053	COA8	no	complete	0.247	0.012	-0.236	0.00010612	TRUE
isoComp_00041020	geneComp_00005012	ENST00000643595	ENSG00000122512	PMS2	no	complete	0.482	0.036	-0.446	0.000107284	TRUE
isoComp_00152119	geneComp_00041213	ENST00000635060	ENSG00000282851	BISPR	no	complete	0.32	0.072	-0.248	0.000107847	TRUE
isoComp_00011455	geneComp_00001278	ENST00000549060	ENSG00000075884	ARHGAP15	no	complete	0.16	0.025	-0.135	0.000110514	TRUE
isoComp_00007594	geneComp_00000869	ENST00000680317	ENSG00000064703	DDX20	no	complete	0.447	0.082	-0.365	0.000110695	TRUE
isoComp_00089948	geneComp_00012060	ENST00000597503	ENSG00000170954	ZNF415	no	complete	0.13	0.025	-0.105	0.00011173	FALSE
isoComp_00084148	geneComp_00011160	ENST00000648006	ENSG00000166710	B2M	no	complete	0.347	0.548	0.201	0.000120922	TRUE
isoComp_00092070	geneComp_00012431	ENST00000303334	ENSG00000172828	CES3	no	complete	0.937	0.238	-0.699	0.000122204	TRUE
isoComp_00025200	geneComp_00002944	ENST00000592721	ENSG00000105298	CACTIN	no	complete	0.124	0.01	-0.114	0.000124175	FALSE
isoComp_00096827	geneComp_00013272	ENST00000496152	ENSG00000178057	NDUFAF3	no	complete	0.496	0.239	-0.256	0.000124175	TRUE
isoComp_00040312	geneComp_00004916	ENST00000407202	ENSG00000121417	ZNF211	no	complete	0.409	0.041	-0.368	0.000128653	TRUE
isoComp_00007263	geneComp_00000838	ENST00000393639	ENSG00000063761	ADCK1	no	complete	0.242	0.068	-0.174	0.000129485	TRUE
isoComp_00104755	geneComp_00014892	ENST00000342358	ENSG00000187527	ATP13A5	no	complete	0.867	0.745	-0.122	0.000134362	NA
isoComp_00100490	geneComp_00014032	ENST00000705282	ENSG00000183023	SLC8A1	no	complete	0.363	0.053	-0.309	0.000138615	FALSE
isoComp_00134933	geneComp_00029113	ENST00000686351	ENSG00000248932	COPB2-DT	no	complete	0.385	0.194	-0.191	0.000142438	FALSE
isoComp_00087058	geneComp_00011567	ENST00000483364	ENSG00000168487	BMP1	no	complete	0.14	0.016	-0.123	0.000145763	TRUE
isoComp_00108876	geneComp_00015692	ENST00000400334	ENSG00000197563	PIGN	no	complete	0.265	0.013	-0.253	0.000146725	TRUE
isoComp_00095021	geneComp_00012915	ENST00000545089	ENSG00000175832	ETV4	no	complete	0.46	0.021	-0.44	0.000146743	TRUE
isoComp_00076537	geneComp_00009941	ENST00000478730	ENSG00000160991	ORAI2	no	complete	0.259	0.038	-0.222	0.000147403	TRUE
isoComp_00087551	geneComp_00011642	ENST00000541144	ENSG00000168876	ANKRD49	no	complete	0.195	0.009	-0.186	0.000147403	TRUE
isoComp_00154865	geneComp_00043395	ENST00000674062	ENSG00000288558	DUS4L-BCAP29	no	complete	0.464	0.035	-0.429	0.000148847	TRUE
isoComp_00005177	geneComp_00000598	ENST00000546305	ENSG00000047346	ATOSA	no	complete	0.168	0.023	-0.145	0.000149435	TRUE
isoComp_00069147	geneComp_00008844	ENST00000554114	ENSG00000151338	MIPOL1	no	complete	0.118	0.017	-0.1	0.000149691	TRUE
isoComp_00095769	geneComp_00013092	ENST00000449319	ENSG00000176973	FAM89B	no	complete	0.532	0.299	-0.233	0.000153028	TRUE
isoComp_00077219	geneComp_00010033	ENST00000547543	ENSG00000161996	WDR90	no	complete	0.287	0.062	-0.225	0.000157632	NA
isoComp_00100946	geneComp_00014140	ENST00000402174	ENSG00000183579	ZNRF3	no	complete	0.879	0.026	-0.853	0.000157939	TRUE
isoComp_00046563	geneComp_00005839	ENST00000555727	ENSG00000129566	TEP1	no	complete	0.207	0.062	-0.145	0.000163452	TRUE
isoComp_00080729	geneComp_00010608	ENST00000502975	ENSG00000164221	CCDC112	no	complete	0.221	0.008	-0.213	0.000165344	TRUE
isoComp_00016361	geneComp_00001839	ENST00000546946	ENSG00000091039	OSBPL8	no	complete	0.169	0.032	-0.137	0.000169994	TRUE
isoComp_00034735	geneComp_00004156	ENST00000407482	ENSG00000115129	TP53I3	no	complete	0.127	0.008	-0.119	0.000175022	TRUE
isoComp_00092872	geneComp_00012549	ENST00000580170	ENSG00000173482	PTPRM	no	complete	0.27	0.016	-0.254	0.000175269	NA
isoComp_00070206	geneComp_00009015	ENST00000371023	ENSG00000152763	DNAI4	no	complete	0.396	0.009	-0.388	0.000184839	FALSE
isoComp_00040979	geneComp_00005008	ENST00000692873	ENSG00000122483	CCDC18	no	complete	0.304	0.009	-0.295	0.000185169	TRUE
isoComp_00048823	geneComp_00006141	ENST00000394267	ENSG00000131771	PPP1R1B	no	complete	0.327	0.079	-0.248	0.000185317	TRUE
isoComp_00063905	geneComp_00008101	ENST00000452086	ENSG00000144445	KANSL1L	no	complete	0.121	0.011	-0.111	0.000186378	FALSE
isoComp_00023746	geneComp_00002783	ENST00000520859	ENSG00000104325	DECR1	no	complete	0.289	0.051	-0.238	0.000187764	NA
isoComp_00073352	geneComp_00009479	ENST00000394622	ENSG00000157214	STEAP2	no	complete	0.213	0.006	-0.207	0.000192229	TRUE
isoComp_00051279	geneComp_00006468	ENST00000338564	ENSG00000134138	MEIS2	no	complete	0.265	0.045	-0.22	0.000193844	FALSE
isoComp_00078110	geneComp_00010187	ENST00000498791	ENSG00000162813	BPNT1	no	complete	0.126	0.011	-0.114	0.000193844	NA
isoComp_00062229	geneComp_00007875	ENST00000312263	ENSG00000143164	DCAF6	no	complete	0.299	0.429	0.13	0.000195931	FALSE
isoComp_00121264	geneComp_00021575	ENST00000606288	ENSG00000225138	SLC9A3-AS1	no	complete	0.125	0.016	-0.109	0.000195931	TRUE
isoComp_00060497	geneComp_00007645	ENST00000269025	ENSG00000141294	LRRC46	no	complete	0.5	0	-0.5	0.000201765	TRUE
isoComp_00025714	geneComp_00003011	ENST00000600238	ENSG00000105640	RPL18A	no	complete	0.286	0.159	-0.127	0.000214233	TRUE
isoComp_00096556	geneComp_00013221	ENST00000585277	ENSG00000177728	TMEM94	no	complete	0.115	0.012	-0.103	0.000223493	TRUE
isoComp_00083163	geneComp_00011025	ENST00000569589	ENSG00000166145	SPINT1	no	complete	0.15	0.027	-0.123	0.000234343	TRUE
isoComp_00084563	geneComp_00011226	ENST00000555155	ENSG00000166965	RCCD1	no	complete	0.487	0.035	-0.452	0.000252943	TRUE
isoComp_00080841	geneComp_00010632	ENST00000510309	ENSG00000164308	ERAP2	no	complete	0.141	0.02	-0.12	0.000253181	TRUE
isoComp_00157169	geneComp_00044876	ENST00000701449	ENSG00000291084	ALOX12P2	no	complete	0.126	0.01	-0.116	0.000253962	FALSE
isoComp_00119623	geneComp_00020537	ENST00000276054	ENSG00000221994	ZNF630	no	complete	0.276	0.876	0.601	0.000261832	TRUE
isoComp_00046560	geneComp_00005839	ENST00000262715	ENSG00000129566	TEP1	no	complete	0.287	0.675	0.388	0.000272447	TRUE
isoComp_00020084	geneComp_00002296	ENST00000554357	ENSG00000100815	TRIP11	no	complete	0.212	0.08	-0.132	0.000276205	TRUE
isoComp_00017363	geneComp_00001937	ENST00000264028	ENSG00000095139	ARCN1	no	complete	0.735	0.921	0.186	0.000276707	FALSE
isoComp_00118999	geneComp_00020154	ENST00000502950	ENSG00000218336	TENM3	no	complete	0.27	0.064	-0.206	0.000276707	TRUE
isoComp_00079483	geneComp_00010425	ENST00000462046	ENSG00000163684	RPP14	no	complete	0.337	0.06	-0.277	0.000278019	FALSE
isoComp_00134667	geneComp_00028966	ENST00000417333	ENSG00000248538	PPP1R3B-DT	no	complete	0.135	0.01	-0.125	0.00030519	FALSE
isoComp_00017827	geneComp_00002006	ENST00000434114	ENSG00000099290	WASHC2A	no	complete	0.261	0.022	-0.239	0.000312723	TRUE
isoComp_00039078	geneComp_00004727	ENST00000402003	ENSG00000119801	YPEL5	no	complete	0.311	0.009	-0.302	0.000317175	FALSE
isoComp_00048835	geneComp_00006142	ENST00000521461	ENSG00000131773	KHDRBS3	no	complete	0.155	0.022	-0.133	0.000318392	TRUE
isoComp_00068058	geneComp_00008686	ENST00000531820	ENSG00000149476	TKFC	no	complete	0.306	0.06	-0.246	0.000321604	TRUE
isoComp_00050916	geneComp_00006424	ENST00000529507	ENSG00000133805	AMPD3	no	complete	0.384	0.036	-0.348	0.000342813	FALSE
isoComp_00088230	geneComp_00011751	ENST00000548483	ENSG00000169372	CRADD	no	complete	0.33	0.004	-0.326	0.000352686	TRUE
isoComp_00011051	geneComp_00001243	ENST00000251074	ENSG00000075188	NUP37	no	complete	0.414	0.177	-0.237	0.000357857	TRUE
isoComp_00033768	geneComp_00004045	ENST00000478469	ENSG00000114054	PCCB	no	complete	0.129	0.002	-0.127	0.000359513	TRUE
isoComp_00094178	geneComp_00012779	ENST00000394066	ENSG00000174996	KLC2	no	complete	0.134	0.009	-0.125	0.000360866	TRUE
isoComp_00033014	geneComp_00003944	ENST00000231061	ENSG00000113140	SPARC	no	complete	0.69	0.949	0.259	0.000376269	TRUE
isoComp_00084032	geneComp_00011148	ENST00000679779	ENSG00000166598	HSP90B1	no	complete	0.149	0.041	-0.108	0.000379956	TRUE
isoComp_00107570	geneComp_00015476	ENST00000648187	ENSG00000196715	VKORC1L1	no	complete	0.137	0.291	0.154	0.000381186	TRUE
isoComp_00101203	geneComp_00014200	ENST00000546553	ENSG00000183828	NUDT14	no	complete	0.137	0.013	-0.124	0.000384341	FALSE
isoComp_00053540	geneComp_00006750	ENST00000258214	ENSG00000135736	CCDC102A	no	complete	0.759	0.967	0.208	0.000392102	TRUE
isoComp_00026458	geneComp_00003110	ENST00000706158	ENSG00000106069	CHN2	no	complete	0.212	0.026	-0.186	0.00040252	TRUE
isoComp_00070031	geneComp_00008983	ENST00000378202	ENSG00000152464	RPP38	no	complete	0.41	0.188	-0.223	0.000405916	TRUE
isoComp_00141000	geneComp_00032997	ENST00000555427	ENSG00000258839	MC1R	no	complete	0.492	0.014	-0.478	0.000406659	TRUE
isoComp_00024247	geneComp_00002831	ENST00000511342	ENSG00000104723	TUSC3	no	complete	0.257	0.148	-0.109	0.000418302	TRUE
isoComp_00088796	geneComp_00011830	ENST00000449107	ENSG00000169814	BTD	no	complete	0.119	0.004	-0.115	0.000418302	NA
isoComp_00103593	geneComp_00014652	ENST00000647059	ENSG00000186073	CDIN1	no	complete	0.32	0.048	-0.272	0.000425056	FALSE
isoComp_00060542	geneComp_00007651	ENST00000590253	ENSG00000141349	G6PC3	no	complete	0.297	0.101	-0.196	0.000447636	TRUE
isoComp_00103499	geneComp_00014628	ENST00000418952	ENSG00000185955	SPACDR	no	complete	0.882	0.229	-0.653	0.000463042	TRUE
isoComp_00063914	geneComp_00008102	ENST00000440779	ENSG00000144451	SPAG16	no	complete	0.395	0.078	-0.317	0.000465712	TRUE
isoComp_00034198	geneComp_00004089	ENST00000383598	ENSG00000114544	SLC41A3	no	complete	0.417	0.007	-0.41	0.000469678	TRUE
isoComp_00157483	geneComp_00044923	ENST00000702861	ENSG00000291134	WASH2P	no	complete	0.136	0.01	-0.125	0.000475178	TRUE
isoComp_00109526	geneComp_00015802	ENST00000627582	ENSG00000197959	DNM3	no	complete	0.5	0	-0.5	0.000476855	TRUE
isoComp_00131752	geneComp_00027607	ENST00000594810	ENSG00000241158	ADAMTS9-AS1	no	complete	0.215	0.018	-0.197	0.000496004	TRUE
isoComp_00059136	geneComp_00007516	ENST00000409628	ENSG00000140350	ANP32A	no	complete	0.234	0.064	-0.17	0.000503374	FALSE
isoComp_00135478	geneComp_00029437	ENST00000512090	ENSG00000249835	VCAN-AS1	no	complete	0.761	0.997	0.236	0.000509915	FALSE
isoComp_00039111	geneComp_00004731	ENST00000238875	ENSG00000119862	LGALSL	no	complete	0.364	0.97	0.606	0.000512565	TRUE
isoComp_00104789	geneComp_00014900	ENST00000540964	ENSG00000187554	TLR5	no	complete	0.292	0.125	-0.167	0.00056833	NA
isoComp_00102566	geneComp_00014472	ENST00000437750	ENSG00000185238	PRMT3	no	complete	0.203	0.011	-0.192	0.000637258	TRUE
isoComp_00027602	geneComp_00003259	ENST00000377041	ENSG00000107362	ABHD17B	no	complete	0.312	0.123	-0.188	0.000666301	TRUE
isoComp_00020361	geneComp_00002321	ENST00000420868	ENSG00000100979	PLTP	no	complete	0.207	0.024	-0.183	0.000676035	TRUE
isoComp_00146905	geneComp_00037024	ENST00000605459	ENSG00000270547	LINC01235	no	complete	0.116	0.015	-0.101	0.000680887	FALSE
isoComp_00009159	geneComp_00001041	ENST00000483115	ENSG00000069509	FUNDC1	no	complete	0.807	0.34	-0.467	0.000690277	TRUE
isoComp_00139706	geneComp_00032161	ENST00000691249	ENSG00000256269	HMBS	no	complete	0.442	0.008	-0.434	0.000695055	TRUE
isoComp_00142720	geneComp_00034156	ENST00000566506	ENSG00000261170	NA	no	complete	0.34	0.022	-0.318	0.000696333	FALSE
isoComp_00011993	geneComp_00001338	ENST00000305232	ENSG00000077463	SIRT6	no	complete	0.403	0.013	-0.39	0.000722976	TRUE
isoComp_00091053	geneComp_00012266	ENST00000561311	ENSG00000171914	TLN2	no	complete	0.522	0.2	-0.322	0.000724019	TRUE
isoComp_00075945	geneComp_00009856	ENST00000542192	ENSG00000160325	CACFD1	no	complete	0.285	0.019	-0.266	0.000747749	TRUE
isoComp_00109209	geneComp_00015754	ENST00000594395	ENSG00000197782	ZNF780A	no	complete	0.172	0.004	-0.168	0.000753253	TRUE
isoComp_00058986	geneComp_00007495	ENST00000560611	ENSG00000140199	SLC12A6	no	complete	0.152	0.024	-0.128	0.00076485	FALSE
isoComp_00078649	geneComp_00010291	ENST00000420321	ENSG00000163249	CCNYL1	no	complete	0.235	0.126	-0.109	0.000781936	NA
isoComp_00134688	geneComp_00028966	ENST00000648540	ENSG00000248538	PPP1R3B-DT	no	complete	0.063	0.321	0.257	0.000796224	FALSE
isoComp_00005248	geneComp_00000606	ENST00000545746	ENSG00000047621	C12orf4	no	complete	0.146	0.02	-0.126	0.000852547	NA
isoComp_00033234	geneComp_00003980	ENST00000262462	ENSG00000113396	SLC27A6	no	complete	0.541	0.732	0.191	0.000860112	TRUE
isoComp_00124686	geneComp_00023525	ENST00000436880	ENSG00000229989	MIR181A1HG	no	complete	0.344	0.194	-0.15	0.000867335	FALSE
isoComp_00017672	geneComp_00001986	ENST00000433700	ENSG00000096872	IFT74	no	complete	0.18	0.015	-0.166	0.00086741	TRUE
isoComp_00032324	geneComp_00003858	ENST00000618129	ENSG00000112320	SOBP	no	complete	0.297	0.166	-0.131	0.000876578	NA
isoComp_00016620	geneComp_00001867	ENST00000480193	ENSG00000091732	ZC3HC1	no	complete	0.124	0.005	-0.119	0.00089646	FALSE
isoComp_00151808	geneComp_00041048	ENST00000502394	ENSG00000280987	MATR3	no	complete	0.208	0.047	-0.161	0.000902936	TRUE
isoComp_00155070	geneComp_00043555	ENST00000690996	ENSG00000288838	NA	no	complete	0.145	0.508	0.363	0.000930522	FALSE
isoComp_00146224	geneComp_00036530	ENST00000604231	ENSG00000268750	NA	no	complete	0.271	0.054	-0.217	0.000948215	TRUE
isoComp_00045557	geneComp_00005703	ENST00000619227	ENSG00000128346	C22orf23	no	complete	0.345	0.058	-0.287	0.000949577	TRUE
isoComp_00060068	geneComp_00007606	ENST00000565193	ENSG00000140948	ZCCHC14	no	complete	0.145	0.024	-0.121	0.000949577	TRUE
isoComp_00087023	geneComp_00011562	ENST00000568085	ENSG00000168447	SCNN1B	no	complete	0.319	0.161	-0.157	0.000950745	TRUE
isoComp_00081792	geneComp_00010789	ENST00000375747	ENSG00000165025	SYK	no	complete	0.373	0.018	-0.355	0.00097974	FALSE
isoComp_00096539	geneComp_00013221	ENST00000375248	ENSG00000177728	TMEM94	no	complete	0.131	0.011	-0.12	0.00097974	TRUE
isoComp_00031581	geneComp_00003735	ENST00000545232	ENSG00000111647	BLTP3B	no	complete	0.173	0.02	-0.153	0.00101213	TRUE
isoComp_00141791	geneComp_00033534	ENST00000668995	ENSG00000259768	ZFHX3-AS1	no	complete	0.257	0.006	-0.251	0.00103332	FALSE
isoComp_00121810	geneComp_00021863	ENST00000681659	ENSG00000225830	ERCC6	no	complete	0.159	0.014	-0.145	0.00105694	TRUE
isoComp_00128511	geneComp_00025647	ENST00000657484	ENSG00000235257	ITGA9-AS1	no	complete	0.268	0.14	-0.128	0.00110928	TRUE
isoComp_00066820	geneComp_00008527	ENST00000647130	ENSG00000148019	CEP78	no	complete	0.201	0.011	-0.19	0.00114288	TRUE
isoComp_00095503	geneComp_00013027	ENST00000478658	ENSG00000176542	USF3	no	complete	0.152	0.01	-0.142	0.00117093	TRUE
isoComp_00138978	geneComp_00031759	ENST00000481972	ENSG00000255154	HTD2	no	complete	0.694	0.341	-0.353	0.00119133	FALSE
isoComp_00098624	geneComp_00013689	ENST00000301547	ENSG00000180855	ZNF443	no	complete	0.5	0.997	0.497	0.0012157	TRUE
isoComp_00078155	geneComp_00010200	ENST00000469861	ENSG00000162877	PM20D1	no	complete	0.38	0.146	-0.234	0.00122186	TRUE
isoComp_00090252	geneComp_00012128	ENST00000442091	ENSG00000171291	ZNF439	no	complete	0.207	0.014	-0.193	0.00126261	TRUE
isoComp_00037301	geneComp_00004480	ENST00000438616	ENSG00000117407	ARTN	no	complete	0.556	0.14	-0.416	0.0012636	TRUE
isoComp_00107429	geneComp_00015455	ENST00000394170	ENSG00000196652	ZKSCAN5	no	complete	0.514	0.076	-0.438	0.0012636	TRUE
isoComp_00056136	geneComp_00007108	ENST00000330775	ENSG00000137700	SLC37A4	no	complete	0.278	0.023	-0.255	0.0012753	NA
isoComp_00103859	geneComp_00014705	ENST00000515161	ENSG00000186314	PRELID2	no	complete	0.292	0.073	-0.218	0.00127958	FALSE
isoComp_00023036	geneComp_00002705	ENST00000564967	ENSG00000103485	QPRT	no	complete	0.565	0.341	-0.224	0.00132334	TRUE
isoComp_00037448	geneComp_00004503	ENST00000474047	ENSG00000117533	VAMP4	no	complete	0.176	0.007	-0.169	0.00132434	TRUE
isoComp_00092436	geneComp_00012472	ENST00000583307	ENSG00000173065	FAM222B	no	complete	0.293	0.033	-0.26	0.00132434	TRUE
isoComp_00157807	geneComp_00044969	ENST00000702506	ENSG00000291188	NA	no	complete	0.811	0.935	0.124	0.00133273	FALSE
isoComp_00035397	geneComp_00004230	ENST00000470268	ENSG00000115524	SF3B1	no	complete	0.152	0.015	-0.137	0.0013466	NA
isoComp_00091848	geneComp_00012398	ENST00000368248	ENSG00000172673	THEMIS	no	complete	0.873	0.226	-0.647	0.00135781	FALSE
isoComp_00037552	geneComp_00004518	ENST00000640726	ENSG00000117620	SLC35A3	no	complete	0.142	0.007	-0.135	0.00138309	TRUE
isoComp_00000044	geneComp_00000007	ENST00000695971	ENSG00000000971	CFH	no	complete	0.239	0.007	-0.232	0.00146053	TRUE
isoComp_00027208	geneComp_00003201	ENST00000480279	ENSG00000106701	FSD1L	no	complete	0.15	0.021	-0.129	0.00146346	TRUE
isoComp_00107779	geneComp_00015515	ENST00000360171	ENSG00000196873	ZNG1C	no	complete	0.325	0.054	-0.271	0.00151304	TRUE
isoComp_00132643	geneComp_00028064	ENST00000649419	ENSG00000242802	AP5Z1	no	complete	0.171	0.029	-0.142	0.00151304	TRUE
isoComp_00074308	geneComp_00009618	ENST00000474594	ENSG00000158467	AHCYL2	no	complete	0.312	0.042	-0.27	0.00151793	TRUE
isoComp_00107019	geneComp_00015406	ENST00000646446	ENSG00000196460	RFX8	no	complete	0	0.795	0.795	0.00153273	TRUE
isoComp_00066156	geneComp_00008442	ENST00000373165	ENSG00000147180	ZNF711	no	complete	0.477	0.088	-0.389	0.00153758	TRUE
isoComp_00101512	geneComp_00014263	ENST00000417231	ENSG00000184182	UBE2F	no	complete	0.122	0.011	-0.111	0.00155212	NA
isoComp_00133203	geneComp_00028394	ENST00000636880	ENSG00000243989	ACY1	no	complete	0.545	0.045	-0.501	0.00155212	TRUE
isoComp_00095457	geneComp_00013016	ENST00000555111	ENSG00000176463	SLCO3A1	no	complete	0.126	0.004	-0.121	0.00159875	FALSE
isoComp_00017244	geneComp_00001922	ENST00000697552	ENSG00000094631	HDAC6	no	complete	0.151	0.012	-0.139	0.00160276	NA
isoComp_00016689	geneComp_00001877	ENST00000490506	ENSG00000092036	HAUS4	no	complete	0.138	0.036	-0.102	0.00166214	NA
isoComp_00011177	geneComp_00001259	ENST00000685332	ENSG00000075407	ZNF37A	no	complete	0.552	0.331	-0.22	0.00168816	FALSE
isoComp_00098152	geneComp_00013542	ENST00000512439	ENSG00000179909	ZNF154	no	complete	0.261	0.027	-0.234	0.00169303	TRUE
isoComp_00031963	geneComp_00003789	ENST00000316316	ENSG00000111877	MCM9	no	complete	0.459	0.15	-0.309	0.00170847	FALSE
isoComp_00049706	geneComp_00006253	ENST00000518370	ENSG00000132561	MATN2	no	complete	0.473	0.043	-0.43	0.00171155	FALSE
isoComp_00041429	geneComp_00005075	ENST00000381352	ENSG00000123094	RASSF8	no	complete	0.243	0.01	-0.233	0.00172526	TRUE
isoComp_00081945	geneComp_00010823	ENST00000614558	ENSG00000165175	MID1IP1	no	complete	0.275	0.052	-0.223	0.00173722	TRUE
isoComp_00081821	geneComp_00010795	ENST00000377270	ENSG00000165060	FXN	no	complete	0.481	0.026	-0.454	0.00180912	TRUE
isoComp_00066966	geneComp_00008549	ENST00000613129	ENSG00000148248	SURF4	no	complete	0.295	0.013	-0.283	0.00200696	TRUE
isoComp_00012125	geneComp_00001353	ENST00000392194	ENSG00000078018	MAP2	no	complete	0.283	0.118	-0.166	0.00201926	TRUE
isoComp_00144572	geneComp_00035499	ENST00000582631	ENSG00000265845	NA	no	complete	0.88	0.366	-0.514	0.0020738	FALSE
isoComp_00111131	geneComp_00016074	ENST00000528435	ENSG00000198851	CD3E	no	complete	0.168	0.033	-0.136	0.00210675	FALSE
isoComp_00018065	geneComp_00002040	ENST00000431809	ENSG00000099849	RASSF7	no	complete	0.319	0.035	-0.284	0.00212524	TRUE
isoComp_00049761	geneComp_00006259	ENST00000566430	ENSG00000132600	PRMT7	no	complete	0.239	0.069	-0.17	0.00213481	TRUE
isoComp_00073223	geneComp_00009463	ENST00000357206	ENSG00000157077	ZFYVE9	no	complete	0.422	0.105	-0.317	0.00217615	TRUE
isoComp_00082418	geneComp_00010912	ENST00000689161	ENSG00000165626	BEND7	no	complete	0.192	0.014	-0.178	0.00219998	TRUE
isoComp_00039931	geneComp_00004864	ENST00000520207	ENSG00000120896	SORBS3	no	complete	0.239	0.087	-0.152	0.00223754	TRUE
isoComp_00059776	geneComp_00007574	ENST00000568142	ENSG00000140682	TGFB1I1	no	complete	0.246	0.034	-0.212	0.00224621	TRUE
isoComp_00109638	geneComp_00015816	ENST00000551736	ENSG00000198001	IRAK4	no	complete	0.275	0.043	-0.231	0.00224621	TRUE
isoComp_00033448	geneComp_00004008	ENST00000393895	ENSG00000113645	WWC1	no	complete	0.29	0.065	-0.226	0.00225656	FALSE
isoComp_00008721	geneComp_00000996	ENST00000494145	ENSG00000068028	RASSF1	no	complete	0.129	0.011	-0.118	0.00228032	TRUE
isoComp_00074674	geneComp_00009677	ENST00000290039	ENSG00000158966	CACHD1	no	complete	0.213	0.029	-0.184	0.00228032	TRUE
isoComp_00041783	geneComp_00005116	ENST00000505662	ENSG00000123415	SMUG1	no	complete	0.32	0.016	-0.304	0.00230671	TRUE
isoComp_00018100	geneComp_00002045	ENST00000406522	ENSG00000099889	ARVCF	no	complete	0.386	0.006	-0.38	0.00234261	FALSE
isoComp_00007690	geneComp_00000877	ENST00000409998	ENSG00000064989	CALCRL	no	complete	0.392	0.118	-0.275	0.00236792	TRUE
isoComp_00100628	geneComp_00014065	ENST00000422252	ENSG00000183172	SMDT1	no	complete	0.216	0.089	-0.127	0.00241215	TRUE
isoComp_00072958	geneComp_00009429	ENST00000534668	ENSG00000156738	MS4A1	no	complete	0.251	0.012	-0.239	0.00241524	TRUE
isoComp_00007527	geneComp_00000863	ENST00000343225	ENSG00000064651	SLC12A2	no	complete	0.244	0.142	-0.102	0.00245325	TRUE
isoComp_00074536	geneComp_00009661	ENST00000564004	ENSG00000158805	ZNF276	no	complete	0.602	0.371	-0.23	0.0024666	TRUE
isoComp_00022611	geneComp_00002656	ENST00000567739	ENSG00000103174	NAGPA	no	complete	0.153	0.017	-0.136	0.00253828	TRUE
isoComp_00073089	geneComp_00009447	ENST00000559454	ENSG00000156958	GALK2	no	complete	0.25	0.027	-0.222	0.00256986	NA
isoComp_00055126	geneComp_00006971	ENST00000373387	ENSG00000136895	GARNL3	no	complete	0.254	0.098	-0.157	0.0025785	TRUE
isoComp_00011953	geneComp_00001333	ENST00000593523	ENSG00000077348	EXOSC5	no	complete	0.499	0.315	-0.184	0.0026229	TRUE
isoComp_00124569	geneComp_00023451	ENST00000566632	ENSG00000229809	ZNF688	no	complete	0.245	0.016	-0.229	0.00263504	TRUE
isoComp_00071705	geneComp_00009233	ENST00000419842	ENSG00000154822	PLCL2	no	complete	0.135	0.013	-0.122	0.00266053	TRUE
isoComp_00076862	geneComp_00009975	ENST00000579146	ENSG00000161395	PGAP3	no	complete	0.124	0.015	-0.109	0.00266699	TRUE
isoComp_00045306	geneComp_00005656	ENST00000460184	ENSG00000127952	STYXL1	no	complete	0.197	0.068	-0.129	0.00266742	FALSE
isoComp_00062586	geneComp_00007927	ENST00000483335	ENSG00000143382	ADAMTSL4	no	complete	0.55	0.401	-0.149	0.00271993	TRUE
isoComp_00106127	geneComp_00015238	ENST00000476133	ENSG00000189171	S100A13	no	complete	0.385	0.142	-0.242	0.00273894	FALSE
isoComp_00016352	geneComp_00001837	ENST00000349598	ENSG00000090989	EXOC1	no	complete	0.315	0.157	-0.159	0.00274088	FALSE
isoComp_00029264	geneComp_00003468	ENST00000585313	ENSG00000109083	IFT20	no	complete	0.201	0	-0.201	0.00277725	FALSE
isoComp_00026910	geneComp_00003165	ENST00000223215	ENSG00000106484	MEST	no	complete	0.663	0.291	-0.372	0.00281063	TRUE
isoComp_00093845	geneComp_00012715	ENST00000412676	ENSG00000174600	CMKLR1	no	complete	0.409	0.128	-0.28	0.00281242	TRUE
isoComp_00097750	geneComp_00013467	ENST00000399082	ENSG00000179344	HLA-DQB1	no	complete	0.137	0.035	-0.102	0.00283728	TRUE
isoComp_00055021	geneComp_00006955	ENST00000484208	ENSG00000136856	SLC2A8	no	complete	0.264	0.02	-0.244	0.00291661	TRUE
isoComp_00020986	geneComp_00002413	ENST00000380843	ENSG00000101365	IDH3B	no	complete	0.7	0.398	-0.303	0.00293456	TRUE
isoComp_00059239	geneComp_00007523	ENST00000565970	ENSG00000140386	SCAPER	no	complete	0.501	0.055	-0.446	0.00295825	FALSE
isoComp_00070274	geneComp_00009023	ENST00000472590	ENSG00000152804	HHEX	no	complete	0.497	0.058	-0.439	0.00297652	TRUE
isoComp_00024904	geneComp_00002909	ENST00000534378	ENSG00000105135	ILVBL	no	complete	0.279	0.042	-0.237	0.00297989	TRUE
isoComp_00121836	geneComp_00021884	ENST00000420844	ENSG00000225885	NA	no	complete	0.18	0.008	-0.172	0.00298319	TRUE
isoComp_00124743	geneComp_00023570	ENST00000445452	ENSG00000230084	ZBTB47-AS1	no	complete	0.232	0.009	-0.222	0.00298319	FALSE
isoComp_00000056	geneComp_00000007	ENST00000696027	ENSG00000000971	CFH	no	complete	0.308	0.014	-0.294	0.00301041	TRUE
isoComp_00043966	geneComp_00005489	ENST00000246337	ENSG00000126088	UROD	no	complete	0.635	0.337	-0.298	0.00307716	TRUE
isoComp_00002628	geneComp_00000301	ENST00000300853	ENSG00000012061	ERCC1	no	complete	0.471	0.617	0.146	0.00308838	TRUE
isoComp_00112833	geneComp_00017357	ENST00000436743	ENSG00000203747	FCGR3A	no	complete	0.338	0.037	-0.301	0.00308955	TRUE
isoComp_00104270	geneComp_00014790	ENST00000541517	ENSG00000186815	TPCN1	no	complete	0.343	0.103	-0.239	0.00309446	FALSE
isoComp_00021053	geneComp_00002429	ENST00000462062	ENSG00000101443	WFDC2	no	complete	0.256	0.113	-0.143	0.00310196	TRUE
isoComp_00072507	geneComp_00009358	ENST00000640969	ENSG00000156113	KCNMA1	no	complete	0.153	0.029	-0.124	0.00310196	TRUE
isoComp_00038724	geneComp_00004682	ENST00000592486	ENSG00000119559	C19orf25	no	complete	0.396	0.217	-0.179	0.00312235	TRUE
isoComp_00034625	geneComp_00004139	ENST00000434524	ENSG00000114988	LMAN2L	no	complete	0.435	0.176	-0.259	0.00325359	TRUE
isoComp_00060374	geneComp_00007636	ENST00000325214	ENSG00000141179	PCTP	no	complete	0.583	0.086	-0.497	0.00328289	TRUE
isoComp_00013743	geneComp_00001527	ENST00000369739	ENSG00000083097	DOP1A	no	complete	0.125	0.011	-0.113	0.00329587	TRUE
isoComp_00065054	geneComp_00008261	ENST00000521858	ENSG00000145736	GTF2H2	no	complete	0.28	0.147	-0.133	0.00329703	TRUE
isoComp_00095855	geneComp_00013104	ENST00000560168	ENSG00000177045	SIX5	no	complete	0.5	0.13	-0.37	0.00330006	TRUE
isoComp_00103143	geneComp_00014567	ENST00000530112	ENSG00000185670	ZBTB3	no	complete	0.649	0.207	-0.442	0.00330006	TRUE
isoComp_00023974	geneComp_00002804	ENST00000519833	ENSG00000104432	IL7	no	complete	0.464	0.027	-0.438	0.00335592	TRUE
isoComp_00113396	geneComp_00017480	ENST00000375055	ENSG00000204305	AGER	no	complete	0.261	0.033	-0.228	0.00335967	TRUE
isoComp_00077117	geneComp_00010019	ENST00000590296	ENSG00000161914	ZNF653	no	complete	0.171	0.012	-0.158	0.00336978	FALSE
isoComp_00055277	geneComp_00007001	ENST00000686794	ENSG00000137070	IL11RA	no	complete	0.143	0.029	-0.115	0.00343979	TRUE
isoComp_00060084	geneComp_00007608	ENST00000565123	ENSG00000140961	OSGIN1	no	complete	0.249	0.056	-0.193	0.00345706	TRUE
isoComp_00080313	geneComp_00010539	ENST00000639561	ENSG00000164053	ATRIP	no	complete	0.167	0.048	-0.119	0.00347544	TRUE
isoComp_00066817	geneComp_00008527	ENST00000642669	ENSG00000148019	CEP78	no	complete	0.209	0.043	-0.166	0.00347897	TRUE
isoComp_00084780	geneComp_00011253	ENST00000513544	ENSG00000167107	ACSF2	no	complete	0.272	0.068	-0.204	0.00349261	TRUE
isoComp_00044992	geneComp_00005625	ENST00000570649	ENSG00000127564	PKMYT1	no	complete	0.36	0.133	-0.226	0.00361457	FALSE
isoComp_00061765	geneComp_00007794	ENST00000442846	ENSG00000142512	SIGLEC10	no	complete	0.43	0.074	-0.356	0.00365452	TRUE
isoComp_00065402	geneComp_00008321	ENST00000631498	ENSG00000146122	DAAM2	no	complete	0.449	0.2	-0.249	0.00366319	TRUE
isoComp_00038815	geneComp_00004695	ENST00000238633	ENSG00000119655	NPC2	no	complete	0.15	0.044	-0.106	0.00368621	FALSE
isoComp_00024775	geneComp_00002890	ENST00000396331	ENSG00000104972	LILRB1	no	complete	0.657	0.438	-0.219	0.00378827	TRUE
isoComp_00022373	geneComp_00002630	ENST00000219302	ENSG00000103024	NME3	no	complete	0.856	0.261	-0.595	0.00381786	TRUE
isoComp_00089158	geneComp_00011910	ENST00000527733	ENSG00000170242	USP47	no	complete	0.645	0.336	-0.309	0.00389366	FALSE
isoComp_00066482	geneComp_00008486	ENST00000396623	ENSG00000147576	ADHFE1	no	complete	0.309	0.009	-0.299	0.00392295	TRUE
isoComp_00153474	geneComp_00042227	ENST00000650690	ENSG00000286071	NA	no	complete	0.264	0.01	-0.253	0.00395449	FALSE
isoComp_00020083	geneComp_00002296	ENST00000267622	ENSG00000100815	TRIP11	no	complete	0.785	0.91	0.125	0.00397737	TRUE
isoComp_00056909	geneComp_00007208	ENST00000461650	ENSG00000138134	STAMBPL1	no	complete	0.195	0.009	-0.186	0.00406524	TRUE
isoComp_00106786	geneComp_00015357	ENST00000528448	ENSG00000196323	ZBTB44	no	complete	0.192	0.024	-0.168	0.00409142	TRUE
isoComp_00002235	geneComp_00000261	ENST00000485729	ENSG00000010704	HFE	no	complete	0.128	0.01	-0.118	0.0041253	TRUE
isoComp_00046065	geneComp_00005776	ENST00000395463	ENSG00000129007	CALML4	no	complete	0.223	0.017	-0.206	0.00413871	FALSE
isoComp_00082414	geneComp_00010912	ENST00000486542	ENSG00000165626	BEND7	no	complete	0.144	0.019	-0.126	0.00415757	TRUE
isoComp_00092554	geneComp_00012495	ENST00000465304	ENSG00000173200	PARP15	no	complete	0.395	0.054	-0.341	0.00415757	TRUE
isoComp_00003401	geneComp_00000396	ENST00000642999	ENSG00000021574	SPAST	no	complete	0.329	0.125	-0.204	0.00433777	TRUE
isoComp_00069234	geneComp_00008855	ENST00000343765	ENSG00000151445	VIPAS39	no	complete	0.197	0.029	-0.168	0.00442695	TRUE
isoComp_00060490	geneComp_00007644	ENST00000579336	ENSG00000141293	SKAP1	no	complete	0.205	0.037	-0.168	0.004559	TRUE
isoComp_00056494	geneComp_00007150	ENST00000569936	ENSG00000137868	STRA6	no	complete	0.16	0.04	-0.121	0.00461061	FALSE
isoComp_00102803	geneComp_00014509	ENST00000550097	ENSG00000185432	TMT1A	no	complete	0.377	0.058	-0.319	0.0047532	TRUE
isoComp_00140999	geneComp_00032997	ENST00000555147	ENSG00000258839	MC1R	no	complete	0.075	0.485	0.41	0.00479648	TRUE
isoComp_00013573	geneComp_00001515	ENST00000439747	ENSG00000082515	MRPL22	no	complete	0.63	0.191	-0.439	0.00485891	TRUE
isoComp_00038085	geneComp_00004590	ENST00000531845	ENSG00000118513	MYB	no	complete	0.618	0.025	-0.593	0.00486548	TRUE
isoComp_00073881	geneComp_00009548	ENST00000338176	ENSG00000157869	RAB28	no	complete	0.198	0.019	-0.179	0.00491523	TRUE
isoComp_00121715	geneComp_00021826	ENST00000414488	ENSG00000225746	MEG8	no	complete	0.188	0.021	-0.167	0.00492156	FALSE
isoComp_00012535	geneComp_00001399	ENST00000434643	ENSG00000079150	FKBP7	no	complete	0.258	0.013	-0.245	0.00493245	TRUE
isoComp_00046408	geneComp_00005816	ENST00000693296	ENSG00000129422	MTUS1	no	complete	0.66	0.212	-0.448	0.00497128	TRUE
isoComp_00052871	geneComp_00006663	ENST00000682709	ENSG00000135317	SNX14	no	complete	0.156	0.044	-0.112	0.00505609	TRUE
isoComp_00134002	geneComp_00028714	ENST00000650092	ENSG00000246273	SBF2-AS1	no	complete	0.424	0.058	-0.366	0.00514186	TRUE
isoComp_00072972	geneComp_00009431	ENST00000524307	ENSG00000156787	TBC1D31	no	complete	0.149	0.018	-0.131	0.00515156	TRUE
isoComp_00080598	geneComp_00010585	ENST00000309439	ENSG00000164162	ANAPC10	no	complete	0.358	0.067	-0.291	0.0051693	TRUE
isoComp_00041343	geneComp_00005064	ENST00000490696	ENSG00000122958	VPS26A	no	complete	0.236	0.063	-0.174	0.00533685	TRUE
isoComp_00104869	geneComp_00014917	ENST00000397071	ENSG00000187630	DHRS4L2	no	complete	0.751	0.276	-0.475	0.00534973	TRUE
isoComp_00073629	geneComp_00009516	ENST00000398911	ENSG00000157554	ERG	no	complete	0.525	0.057	-0.468	0.00544162	TRUE
isoComp_00055247	geneComp_00006995	ENST00000259526	ENSG00000136999	CCN3	no	complete	0.5	0.958	0.458	0.00544436	TRUE
isoComp_00158357	geneComp_00045246	ENST00000687223	ENSG00000293311	SMPD4BP	no	complete	0.481	0.078	-0.402	0.00551697	FALSE
isoComp_00006412	geneComp_00000731	ENST00000493646	ENSG00000055950	MRPL43	no	complete	0.443	0.245	-0.198	0.00553212	TRUE
isoComp_00032345	geneComp_00003863	ENST00000541292	ENSG00000112357	PEX7	no	complete	0.5	0.008	-0.492	0.00558003	TRUE
isoComp_00086791	geneComp_00011533	ENST00000356151	ENSG00000168297	PXK	no	complete	0.446	0.224	-0.223	0.00563088	TRUE
isoComp_00011674	geneComp_00001303	ENST00000592945	ENSG00000076662	ICAM3	no	complete	0.229	0.017	-0.212	0.0056507	TRUE
isoComp_00052880	geneComp_00006663	ENST00000684017	ENSG00000135317	SNX14	no	complete	0.18	0.032	-0.148	0.00571567	TRUE
isoComp_00080798	geneComp_00010624	ENST00000296734	ENSG00000164294	GPX8	no	complete	0.22	0.059	-0.162	0.00577081	TRUE
isoComp_00083400	geneComp_00011066	ENST00000468407	ENSG00000166278	C2	no	complete	0.269	0.023	-0.246	0.00584355	TRUE
isoComp_00019388	geneComp_00002214	ENST00000216259	ENSG00000100417	PMM1	no	complete	0.506	0.336	-0.17	0.00593381	FALSE
isoComp_00103498	geneComp_00014628	ENST00000332375	ENSG00000185955	SPACDR	no	complete	0.118	0.771	0.653	0.00598353	TRUE
isoComp_00000387	geneComp_00000041	ENST00000453013	ENSG00000003436	TFPI	no	complete	0.316	0.081	-0.235	0.00620131	TRUE
isoComp_00109863	geneComp_00015862	ENST00000373250	ENSG00000198157	HMGN5	no	complete	0.458	0.011	-0.447	0.00635108	TRUE
isoComp_00131617	geneComp_00027509	ENST00000333972	ENSG00000240771	ARHGEF25	no	complete	0.182	0.031	-0.151	0.00635849	TRUE
isoComp_00047967	geneComp_00006032	ENST00000466533	ENSG00000130962	PRRG1	no	complete	0.399	0.092	-0.307	0.00638423	TRUE
isoComp_00000704	geneComp_00000083	ENST00000440284	ENSG00000005187	ACSM3	no	complete	0.002	0.114	0.111	0.00644665	TRUE
isoComp_00077119	geneComp_00010019	ENST00000592756	ENSG00000161914	ZNF653	no	complete	0.159	0.026	-0.132	0.00650815	FALSE
isoComp_00052167	geneComp_00006577	ENST00000257209	ENSG00000134775	FHOD3	no	complete	0.413	0.043	-0.37	0.00660758	TRUE
isoComp_00096842	geneComp_00013275	ENST00000601482	ENSG00000178078	STAP2	no	complete	0.337	0.03	-0.307	0.00660758	TRUE
isoComp_00107515	geneComp_00015471	ENST00000530079	ENSG00000196696	PDXDC2P-NPIPB14P	no	complete	0.514	0.371	-0.144	0.00661787	FALSE
isoComp_00096301	geneComp_00013184	ENST00000568703	ENSG00000177548	RABEP2	no	complete	0.13	0.012	-0.117	0.00663084	TRUE
isoComp_00079316	geneComp_00010403	ENST00000427191	ENSG00000163629	PTPN13	no	complete	0.537	0.32	-0.217	0.00675606	FALSE
isoComp_00111368	geneComp_00016127	ENST00000526019	ENSG00000198945	L3MBTL3	no	complete	0.66	0.059	-0.6	0.00676012	FALSE
isoComp_00080330	geneComp_00010541	ENST00000394339	ENSG00000164056	SPRY1	no	complete	0.485	0.076	-0.409	0.00680181	TRUE
isoComp_00008582	geneComp_00000979	ENST00000453081	ENSG00000067445	TRO	no	complete	0.198	0.029	-0.17	0.00689765	TRUE
isoComp_00079557	geneComp_00010432	ENST00000478206	ENSG00000163702	IL17RC	no	complete	0.16	0.035	-0.124	0.00692498	TRUE
isoComp_00023235	geneComp_00002731	ENST00000220058	ENSG00000103707	MTFMT	no	complete	0.432	0.813	0.381	0.00697081	TRUE
isoComp_00081651	geneComp_00010766	ENST00000330295	ENSG00000164932	CTHRC1	no	complete	0.793	0.566	-0.226	0.0069977	TRUE
isoComp_00109914	geneComp_00015872	ENST00000692313	ENSG00000198185	ZNF334	no	complete	0.245	0.546	0.301	0.00701015	TRUE
isoComp_00053167	geneComp_00006702	ENST00000433805	ENSG00000135469	COQ10A	no	complete	0.457	0.055	-0.401	0.00718259	TRUE
isoComp_00019994	geneComp_00002286	ENST00000681419	ENSG00000100749	VRK1	no	complete	0.565	0.308	-0.258	0.00726192	TRUE
isoComp_00025961	geneComp_00003046	ENST00000598862	ENSG00000105750	ZNF85	no	complete	0.193	0.012	-0.182	0.00733136	TRUE
isoComp_00099508	geneComp_00013871	ENST00000460672	ENSG00000182162	P2RY8	no	complete	0.211	0.087	-0.123	0.00735636	TRUE
isoComp_00066898	geneComp_00008536	ENST00000481146	ENSG00000148153	INIP	no	complete	0.144	0.025	-0.12	0.00741504	FALSE
isoComp_00128693	geneComp_00025757	ENST00000521467	ENSG00000235531	MSC-AS1	no	complete	0.258	0.06	-0.197	0.00744	TRUE
isoComp_00031820	geneComp_00003768	ENST00000392839	ENSG00000111785	RIC8B	no	complete	0.603	0.297	-0.305	0.00757638	TRUE
isoComp_00135954	geneComp_00029689	ENST00000484558	ENSG00000250479	CHCHD10	no	complete	0.169	0.615	0.446	0.00759746	TRUE
isoComp_00101205	geneComp_00014200	ENST00000550912	ENSG00000183828	NUDT14	no	complete	0.632	0.381	-0.251	0.00761656	FALSE
isoComp_00014187	geneComp_00001588	ENST00000380818	ENSG00000085231	AK6	no	complete	0.578	0.184	-0.394	0.0076174	TRUE
isoComp_00039874	geneComp_00004858	ENST00000550189	ENSG00000120837	NFYB	no	complete	0.167	0.006	-0.161	0.00763922	FALSE
isoComp_00000761	geneComp_00000088	ENST00000583414	ENSG00000005243	COPZ2	no	complete	0.14	0.016	-0.123	0.00765329	TRUE
isoComp_00057158	geneComp_00007244	ENST00000420250	ENSG00000138381	ASNSD1	no	complete	0.255	0.019	-0.236	0.00772436	FALSE
isoComp_00029181	geneComp_00003457	ENST00000359094	ENSG00000108984	MAP2K6	no	complete	0.495	0.061	-0.434	0.00776513	TRUE
isoComp_00050854	geneComp_00006417	ENST00000360375	ENSG00000133739	LRRCC1	no	complete	0.503	0.378	-0.124	0.00786392	TRUE
isoComp_00088908	geneComp_00011856	ENST00000520027	ENSG00000169946	ZFPM2	no	complete	0.274	0.124	-0.15	0.00786392	TRUE
isoComp_00156939	geneComp_00044839	ENST00000690102	ENSG00000291043	GLUD1P3	no	complete	0.497	0.3	-0.197	0.00786392	FALSE
isoComp_00027601	geneComp_00003259	ENST00000333421	ENSG00000107362	ABHD17B	no	complete	0.688	0.877	0.188	0.00790407	TRUE
isoComp_00040722	geneComp_00004977	ENST00000439144	ENSG00000122085	MTERF4	no	complete	0.253	0.002	-0.251	0.00792437	TRUE
isoComp_00157990	geneComp_00045010	ENST00000649458	ENSG00000291242	NA	no	complete	0.307	0	-0.307	0.00805686	FALSE
isoComp_00140087	geneComp_00032423	ENST00000653856	ENSG00000257261	SLC38A4-AS1	no	complete	0.246	0.13	-0.116	0.00808741	FALSE
isoComp_00009158	geneComp_00001041	ENST00000378045	ENSG00000069509	FUNDC1	no	complete	0.193	0.66	0.467	0.00810089	TRUE
isoComp_00120540	geneComp_00021135	ENST00000656463	ENSG00000224078	SNHG14	no	complete	0.008	0.17	0.162	0.00824029	FALSE
isoComp_00084165	geneComp_00011164	ENST00000299964	ENSG00000166741	NNMT	no	complete	0.519	0.393	-0.126	0.00828567	FALSE
isoComp_00026435	geneComp_00003109	ENST00000396276	ENSG00000106066	CPVL	no	complete	0.738	0.056	-0.683	0.00836033	TRUE
isoComp_00093007	geneComp_00012572	ENST00000393960	ENSG00000173599	PC	no	complete	0.204	0.059	-0.145	0.00850596	FALSE
isoComp_00033720	geneComp_00004040	ENST00000506326	ENSG00000114019	AMOTL2	no	complete	0.407	0.289	-0.118	0.00853678	FALSE
isoComp_00037438	geneComp_00004501	ENST00000370207	ENSG00000117525	F3	no	complete	0.32	0.002	-0.318	0.00853678	TRUE
isoComp_00073378	geneComp_00009481	ENST00000496677	ENSG00000157224	CLDN12	no	complete	0.129	0.012	-0.117	0.00863542	FALSE
isoComp_00020584	geneComp_00002352	ENST00000395841	ENSG00000101146	RAE1	no	complete	0.426	0.275	-0.15	0.00871383	TRUE
isoComp_00046456	geneComp_00005822	ENST00000557253	ENSG00000129465	RIPK3	no	complete	0.143	0.014	-0.129	0.0087485	TRUE
isoComp_00122167	geneComp_00022066	ENST00000665704	ENSG00000226328	NUP50-DT	no	complete	0.36	0.232	-0.128	0.0087485	FALSE
isoComp_00075241	geneComp_00009759	ENST00000508789	ENSG00000159685	CHCHD6	no	complete	0.273	0.054	-0.219	0.00886985	TRUE
isoComp_00079609	geneComp_00010433	ENST00000684659	ENSG00000163703	CRELD1	no	complete	0.388	0.207	-0.182	0.00894561	TRUE
isoComp_00050093	geneComp_00006305	ENST00000255194	ENSG00000132842	AP3B1	no	complete	0.737	0.307	-0.429	0.00896929	FALSE
isoComp_00069822	geneComp_00008940	ENST00000281932	ENSG00000152133	GPATCH11	no	complete	0.199	0.035	-0.164	0.00932648	TRUE
isoComp_00025542	geneComp_00002985	ENST00000594790	ENSG00000105499	PLA2G4C	no	complete	0.454	0.03	-0.424	0.00940119	FALSE
isoComp_00078060	geneComp_00010180	ENST00000366983	ENSG00000162772	ATF3	no	complete	0.15	0.026	-0.124	0.00956313	TRUE
isoComp_00012496	geneComp_00001396	ENST00000396218	ENSG00000079102	RUNX1T1	no	complete	0.394	0.009	-0.384	0.00958319	FALSE
isoComp_00018298	geneComp_00002070	ENST00000398292	ENSG00000099998	GGT5	no	complete	0.29	0.13	-0.16	0.00966133	FALSE
isoComp_00006877	geneComp_00000788	ENST00000541012	ENSG00000060339	CCAR1	no	complete	0.181	0.032	-0.149	0.00993714	TRUE
isoComp_00156333	geneComp_00044563	ENST00000616141	ENSG00000290569	NA	no	complete	0.373	0.193	-0.18	0.0100783	NA
isoComp_00032956	geneComp_00003936	ENST00000261413	ENSG00000113048	MRPS27	no	complete	0.302	0.132	-0.17	0.0101377	TRUE
isoComp_00069487	geneComp_00008888	ENST00000322522	ENSG00000151689	INPP1	no	complete	0.793	0.355	-0.438	0.0102317	TRUE
isoComp_00136278	geneComp_00029879	ENST00000558687	ENSG00000250988	SNHG21	no	complete	0.497	0.096	-0.401	0.0102317	FALSE
isoComp_00109236	geneComp_00015759	ENST00000602554	ENSG00000197813	NA	no	complete	0.255	0.042	-0.213	0.0102443	FALSE
isoComp_00030631	geneComp_00003626	ENST00000683856	ENSG00000110711	AIP	no	complete	0.193	0.012	-0.181	0.0105353	TRUE
isoComp_00071699	geneComp_00009232	ENST00000442255	ENSG00000154814	OXNAD1	no	complete	0.468	0.197	-0.271	0.010851	TRUE
isoComp_00021476	geneComp_00002495	ENST00000460773	ENSG00000101974	ATP11C	no	complete	0.159	0.045	-0.114	0.0109566	FALSE
isoComp_00110763	geneComp_00016004	ENST00000489086	ENSG00000198721	ECI2	no	complete	0.191	0.012	-0.179	0.0110003	FALSE
isoComp_00024781	geneComp_00002890	ENST00000480375	ENSG00000104972	LILRB1	no	complete	0.162	0.045	-0.117	0.0111007	TRUE
isoComp_00055275	geneComp_00007001	ENST00000685278	ENSG00000137070	IL11RA	no	complete	0.328	0.072	-0.255	0.0113013	TRUE
isoComp_00044692	geneComp_00005582	ENST00000491442	ENSG00000127124	HIVEP3	no	complete	0.156	0.021	-0.135	0.0113338	FALSE
isoComp_00074390	geneComp_00009636	ENST00000529721	ENSG00000158555	GDPD5	no	complete	0.184	0.006	-0.178	0.0114992	NA
isoComp_00049366	geneComp_00006208	ENST00000487197	ENSG00000132330	SCLY	no	complete	0.176	0.044	-0.133	0.0115124	TRUE
isoComp_00027523	geneComp_00003247	ENST00000265382	ENSG00000107242	PIP5K1B	no	complete	0.654	0.311	-0.342	0.0115565	TRUE
isoComp_00085806	geneComp_00011402	ENST00000310157	ENSG00000167755	KLK6	no	complete	0.309	0.124	-0.185	0.0115565	NA
isoComp_00034314	geneComp_00004106	ENST00000430409	ENSG00000114738	MAPKAPK3	no	complete	0.144	0.014	-0.131	0.0115585	TRUE
isoComp_00036411	geneComp_00004354	ENST00000369709	ENSG00000116473	RAP1A	no	complete	0.945	0.73	-0.215	0.0115732	FALSE
isoComp_00089625	geneComp_00012002	ENST00000394909	ENSG00000170631	ZNF16	no	complete	0.512	0.06	-0.452	0.0116145	TRUE
isoComp_00062036	geneComp_00007840	ENST00000650582	ENSG00000142867	BCL10	no	complete	0.232	0.081	-0.151	0.0117732	NA
isoComp_00071816	geneComp_00009245	ENST00000493838	ENSG00000154928	EPHB1	no	complete	0.166	0.047	-0.119	0.0118	TRUE
isoComp_00107297	geneComp_00015441	ENST00000369975	ENSG00000196586	MYO6	no	complete	0.528	0.335	-0.193	0.0118057	TRUE
isoComp_00014473	geneComp_00001620	ENST00000664182	ENSG00000085999	RAD54L	no	complete	0.184	0.072	-0.113	0.0118075	TRUE
isoComp_00048666	geneComp_00006118	ENST00000478065	ENSG00000131584	ACAP3	no	complete	0.412	0.21	-0.202	0.011911	TRUE
isoComp_00044379	geneComp_00005536	ENST00000673934	ENSG00000126705	AHDC1	no	complete	0.418	0.085	-0.332	0.0120152	TRUE
isoComp_00054616	geneComp_00006898	ENST00000429709	ENSG00000136518	ACTL6A	no	complete	0.532	0.329	-0.203	0.012101	NA
isoComp_00029069	geneComp_00003443	ENST00000262435	ENSG00000108854	SMURF2	no	complete	0.625	0.365	-0.26	0.0121505	TRUE
isoComp_00096365	geneComp_00013189	ENST00000613385	ENSG00000177576	C18orf32	no	complete	0.398	0.277	-0.121	0.0123719	FALSE
isoComp_00128503	geneComp_00025647	ENST00000439246	ENSG00000235257	ITGA9-AS1	no	complete	0.386	0.155	-0.231	0.0124637	TRUE
isoComp_00008460	geneComp_00000967	ENST00000558485	ENSG00000067141	NEO1	no	complete	0.232	0.053	-0.178	0.012477	TRUE
isoComp_00015117	geneComp_00001691	ENST00000395915	ENSG00000087586	AURKA	no	complete	0.343	0.168	-0.175	0.012477	TRUE
isoComp_00033176	geneComp_00003971	ENST00000512239	ENSG00000113356	POLR3G	no	complete	0.339	0.203	-0.136	0.0125684	TRUE
isoComp_00070071	geneComp_00008993	ENST00000405223	ENSG00000152527	PLEKHH2	no	complete	0.371	0.079	-0.292	0.0126499	TRUE
isoComp_00064562	geneComp_00008191	ENST00000273668	ENSG00000145088	EAF2	no	complete	0.808	0.514	-0.294	0.012695	TRUE
isoComp_00078154	geneComp_00010200	ENST00000367136	ENSG00000162877	PM20D1	no	complete	0.62	0.854	0.234	0.0128279	TRUE
isoComp_00029830	geneComp_00003525	ENST00000514152	ENSG00000109686	SH3D19	no	complete	0.353	0.077	-0.276	0.0128984	TRUE
isoComp_00093060	geneComp_00012584	ENST00000379687	ENSG00000173681	BCLAF3	no	complete	0.5	0.066	-0.434	0.0130257	TRUE
isoComp_00007617	geneComp_00000871	ENST00000686316	ENSG00000064763	FAR2	no	complete	0.364	0.019	-0.345	0.0132643	TRUE
isoComp_00080436	geneComp_00010553	ENST00000489026	ENSG00000164081	TEX264	no	complete	0.205	0.026	-0.178	0.0135086	TRUE
isoComp_00080373	geneComp_00010547	ENST00000641133	ENSG00000164073	MFSD8	no	complete	0.316	0.126	-0.19	0.0136088	TRUE
isoComp_00097202	geneComp_00013353	ENST00000524918	ENSG00000178685	PARP10	no	complete	0.339	0.103	-0.237	0.0136978	TRUE
isoComp_00093323	geneComp_00012622	ENST00000581774	ENSG00000173918	C1QTNF1	no	complete	0.369	0.056	-0.312	0.0137463	FALSE
isoComp_00033438	geneComp_00004006	ENST00000504251	ENSG00000113638	TTC33	no	complete	0.232	0.011	-0.221	0.0137638	FALSE
isoComp_00074049	geneComp_00009575	ENST00000650567	ENSG00000158079	PTPDC1	no	complete	0.382	0.031	-0.351	0.0137683	TRUE
isoComp_00037447	geneComp_00004503	ENST00000236192	ENSG00000117533	VAMP4	no	complete	0.824	0.993	0.169	0.013777	TRUE
isoComp_00085202	geneComp_00011317	ENST00000585362	ENSG00000167468	GPX4	no	complete	0.387	0.088	-0.299	0.0137996	FALSE
isoComp_00008362	geneComp_00000957	ENST00000523924	ENSG00000066827	ZFAT	no	complete	0.182	0.005	-0.177	0.0140783	TRUE
isoComp_00082286	geneComp_00010887	ENST00000525388	ENSG00000165490	DDIAS	no	complete	0.477	0.056	-0.421	0.0141654	TRUE
isoComp_00031299	geneComp_00003702	ENST00000392583	ENSG00000111335	OAS2	no	complete	0.718	0.426	-0.292	0.0141846	NA
isoComp_00077077	geneComp_00010010	ENST00000550809	ENSG00000161835	TAMALIN	no	complete	0.454	0.118	-0.336	0.0147517	TRUE
isoComp_00101202	geneComp_00014200	ENST00000392568	ENSG00000183828	NUDT14	no	complete	0.009	0.244	0.235	0.0148933	FALSE
isoComp_00069354	geneComp_00008868	ENST00000685324	ENSG00000151503	NCAPD3	no	complete	0.216	0.008	-0.208	0.0149218	TRUE
isoComp_00047544	geneComp_00005979	ENST00000691425	ENSG00000130713	EXOSC2	no	complete	0.284	0.181	-0.103	0.0149607	TRUE
isoComp_00002734	geneComp_00000313	ENST00000013125	ENSG00000012983	MAP4K5	no	complete	0.522	0.272	-0.25	0.0150938	TRUE
isoComp_00095666	geneComp_00013068	ENST00000320095	ENSG00000176845	METRNL	no	complete	0.498	0.731	0.232	0.015172	TRUE
isoComp_00026955	geneComp_00003174	ENST00000242057	ENSG00000106546	AHR	no	complete	0.981	0.822	-0.16	0.0152537	TRUE
isoComp_00014564	geneComp_00001635	ENST00000389675	ENSG00000086504	MRPL28	no	complete	0.211	0.021	-0.191	0.0153848	TRUE
isoComp_00044149	geneComp_00005505	ENST00000262633	ENSG00000126254	RBM42	no	complete	0.18	0.698	0.518	0.0156312	FALSE
isoComp_00002599	geneComp_00000298	ENST00000573688	ENSG00000011638	LDAF1	no	complete	0.185	0.014	-0.171	0.0156391	TRUE
isoComp_00107860	geneComp_00015525	ENST00000369850	ENSG00000196924	FLNA	no	complete	0.755	0.452	-0.303	0.0157219	TRUE
isoComp_00147658	geneComp_00037657	ENST00000661740	ENSG00000272142	LYRM4-AS1	no	complete	0.229	0.052	-0.176	0.0160667	FALSE
isoComp_00044156	geneComp_00005507	ENST00000246548	ENSG00000126261	UBA2	no	complete	0.862	0.657	-0.205	0.016134	TRUE
isoComp_00021145	geneComp_00002450	ENST00000584915	ENSG00000101577	LPIN2	no	complete	0.167	0.062	-0.105	0.0162926	TRUE
isoComp_00097206	geneComp_00013353	ENST00000526007	ENSG00000178685	PARP10	no	complete	0.114	0.221	0.107	0.0164199	TRUE
isoComp_00071556	geneComp_00009208	ENST00000518893	ENSG00000154589	LY96	no	complete	0.414	0.136	-0.278	0.0166475	TRUE
isoComp_00110941	geneComp_00016047	ENST00000361505	ENSG00000198805	PNP	no	complete	0.344	0.53	0.186	0.0167146	TRUE
isoComp_00088906	geneComp_00011856	ENST00000511341	ENSG00000169946	ZFPM2	no	complete	0.211	0.019	-0.192	0.0167223	TRUE
isoComp_00004817	geneComp_00000556	ENST00000559365	ENSG00000041357	PSMA4	no	complete	0.217	0.035	-0.181	0.0167818	TRUE
isoComp_00026150	geneComp_00003067	ENST00000467916	ENSG00000105865	DUS4L	no	complete	0.609	0.12	-0.489	0.0168059	TRUE
isoComp_00040317	geneComp_00004916	ENST00000541801	ENSG00000121417	ZNF211	no	complete	0.141	0.017	-0.124	0.0168127	TRUE
isoComp_00087547	geneComp_00011642	ENST00000302755	ENSG00000168876	ANKRD49	no	complete	0.487	0.217	-0.269	0.0172053	TRUE
isoComp_00078686	geneComp_00010303	ENST00000403729	ENSG00000163297	ANTXR2	no	complete	1	0.754	-0.246	0.0172135	TRUE
isoComp_00056107	geneComp_00007105	ENST00000529281	ENSG00000137692	DCUN1D5	no	complete	0.32	0.016	-0.305	0.0172524	TRUE
isoComp_00002225	geneComp_00000261	ENST00000309234	ENSG00000010704	HFE	no	complete	0.442	0.062	-0.38	0.0173546	TRUE
isoComp_00075770	geneComp_00009834	ENST00000369575	ENSG00000160219	GAB3	no	complete	0.643	0.245	-0.398	0.0173785	TRUE
isoComp_00058094	geneComp_00007350	ENST00000535651	ENSG00000139144	PIK3C2G	no	complete	0.173	0.054	-0.118	0.0175419	TRUE
isoComp_00121923	geneComp_00021929	ENST00000590952	ENSG00000225975	ZNF567-DT	no	complete	0.223	0.041	-0.183	0.0175718	TRUE
isoComp_00074719	geneComp_00009680	ENST00000646800	ENSG00000159023	EPB41	no	complete	0.148	0.012	-0.136	0.0179332	TRUE
isoComp_00051450	geneComp_00006495	ENST00000369569	ENSG00000134262	AP4B1	no	complete	0.395	0.14	-0.255	0.0179698	FALSE
isoComp_00100235	geneComp_00013997	ENST00000377604	ENSG00000182872	RBM10	no	complete	0.395	0.251	-0.144	0.0180343	FALSE
isoComp_00017247	geneComp_00001922	ENST00000697893	ENSG00000094631	HDAC6	no	complete	0.16	0.021	-0.139	0.0181591	NA
isoComp_00013056	geneComp_00001452	ENST00000700374	ENSG00000080815	PSEN1	no	complete	0.297	0.015	-0.282	0.0181999	TRUE
isoComp_00116818	geneComp_00019278	ENST00000460900	ENSG00000213145	CRIP1	no	complete	0.189	0.06	-0.129	0.0181999	TRUE
isoComp_00026208	geneComp_00003076	ENST00000396475	ENSG00000105926	PALS2	no	complete	0.237	0.103	-0.133	0.0182552	TRUE
isoComp_00047697	geneComp_00006000	ENST00000474683	ENSG00000130772	MED18	no	complete	0.182	0.016	-0.166	0.018576	TRUE
isoComp_00080362	geneComp_00010545	ENST00000487805	ENSG00000164068	RNF123	no	complete	0.804	0.454	-0.35	0.0189964	TRUE
isoComp_00075061	geneComp_00009729	ENST00000326735	ENSG00000159363	ATP13A2	no	complete	0.658	0.384	-0.274	0.0190684	TRUE
isoComp_00104480	geneComp_00014837	ENST00000334310	ENSG00000187079	TEAD1	no	complete	0.132	0.014	-0.118	0.0190906	TRUE
isoComp_00064224	geneComp_00008139	ENST00000436654	ENSG00000144677	CTDSPL	no	complete	0.162	0.018	-0.144	0.0193606	TRUE
isoComp_00051831	geneComp_00006533	ENST00000534292	ENSG00000134470	IL15RA	no	complete	0.184	0.032	-0.152	0.019381	TRUE
isoComp_00111431	geneComp_00016129	ENST00000393704	ENSG00000198948	MFAP3L	no	complete	0.34	0.035	-0.305	0.0194051	TRUE
isoComp_00055408	geneComp_00007015	ENST00000635162	ENSG00000137124	ALDH1B1	no	complete	0.234	0.114	-0.12	0.0194568	TRUE
isoComp_00068754	geneComp_00008788	ENST00000680411	ENSG00000150768	DLAT	no	complete	0.222	0.083	-0.139	0.0196926	TRUE
isoComp_00010043	geneComp_00001142	ENST00000396688	ENSG00000072195	SPEG	no	complete	0.183	0.043	-0.14	0.0197603	NA
isoComp_00067669	geneComp_00008645	ENST00000528173	ENSG00000149091	DGKZ	no	complete	0.5	0.198	-0.302	0.0200591	TRUE
isoComp_00069158	geneComp_00008844	ENST00000694963	ENSG00000151338	MIPOL1	no	complete	0.184	0.055	-0.129	0.0202207	TRUE
isoComp_00086601	geneComp_00011506	ENST00000533539	ENSG00000168172	HOOK3	no	complete	0.495	0.146	-0.349	0.0203331	FALSE
isoComp_00090904	geneComp_00012241	ENST00000303143	ENSG00000171812	COL8A2	no	complete	0.75	0.413	-0.337	0.020378	FALSE
isoComp_00109906	geneComp_00015870	ENST00000586559	ENSG00000198182	ZNF607	no	complete	0.497	0.244	-0.252	0.020378	TRUE
isoComp_00038854	geneComp_00004701	ENST00000555144	ENSG00000119684	MLH3	no	complete	0.258	0.041	-0.218	0.0203836	TRUE
isoComp_00059137	geneComp_00007516	ENST00000465139	ENSG00000140350	ANP32A	no	complete	0.389	0.525	0.136	0.020496	FALSE
isoComp_00107178	geneComp_00015424	ENST00000679092	ENSG00000196531	NACA	no	complete	0.314	0.115	-0.199	0.0205006	TRUE
isoComp_00024656	geneComp_00002878	ENST00000592062	ENSG00000104907	TRMT1	no	complete	0.246	0.012	-0.234	0.020714	TRUE
isoComp_00070158	geneComp_00009004	ENST00000474846	ENSG00000152642	GPD1L	no	complete	0.5	0.134	-0.365	0.0208593	TRUE
isoComp_00076182	geneComp_00009895	ENST00000525863	ENSG00000160703	NLRX1	no	complete	0.37	0.03	-0.341	0.0209081	TRUE
isoComp_00005862	geneComp_00000671	ENST00000674063	ENSG00000051382	PIK3CB	no	complete	0.839	0.514	-0.325	0.0209597	FALSE
isoComp_00124745	geneComp_00023570	ENST00000668806	ENSG00000230084	ZBTB47-AS1	no	complete	0.279	0.028	-0.252	0.0209972	FALSE
isoComp_00010405	geneComp_00001170	ENST00000558540	ENSG00000072952	IRAG1	no	complete	0.194	0.01	-0.184	0.0211136	TRUE
isoComp_00019419	geneComp_00002220	ENST00000475965	ENSG00000100429	HDAC10	no	complete	0.864	0.643	-0.221	0.0212099	NA
isoComp_00113873	geneComp_00017562	ENST00000445347	ENSG00000204577	LILRB3	no	complete	0.292	0.038	-0.254	0.02121	TRUE
isoComp_00099575	geneComp_00013880	ENST00000487270	ENSG00000182185	RAD51B	no	complete	0.348	0.15	-0.199	0.0213357	TRUE
isoComp_00045385	geneComp_00005665	ENST00000434248	ENSG00000128000	ZNF780B	no	complete	0.841	0.667	-0.174	0.0213361	NA
isoComp_00109689	geneComp_00015827	ENST00000360128	ENSG00000198042	MAK16	no	complete	0.661	0.947	0.286	0.0213429	TRUE
isoComp_00149600	geneComp_00039155	ENST00000622802	ENSG00000276043	UHRF1	no	complete	0.661	0.376	-0.285	0.0214611	FALSE
isoComp_00130285	geneComp_00026651	ENST00000510032	ENSG00000237765	FAM200B	no	complete	0.262	0.155	-0.107	0.0214713	TRUE
isoComp_00078516	geneComp_00010266	ENST00000444671	ENSG00000163138	PACRGL	no	complete	0.416	0.053	-0.363	0.0215411	TRUE
isoComp_00036216	geneComp_00004327	ENST00000367634	ENSG00000116191	RALGPS2	no	complete	0.501	0.248	-0.253	0.0216042	TRUE
isoComp_00085939	geneComp_00011425	ENST00000381165	ENSG00000167842	MIS12	no	complete	0.173	0.048	-0.125	0.0217292	FALSE
isoComp_00068729	geneComp_00008786	ENST00000280333	ENSG00000150760	DOCK1	no	complete	0.611	0.417	-0.194	0.0217703	FALSE
isoComp_00068038	geneComp_00008685	ENST00000489634	ENSG00000149474	KAT14	no	complete	0.323	0.061	-0.262	0.0217739	TRUE
isoComp_00015499	geneComp_00001745	ENST00000541564	ENSG00000089041	P2RX7	no	complete	0.158	0.045	-0.113	0.0219139	TRUE
isoComp_00101644	geneComp_00014290	ENST00000491556	ENSG00000184307	ZDHHC23	no	complete	0.232	0.087	-0.145	0.0219531	TRUE
isoComp_00105505	geneComp_00015078	ENST00000357749	ENSG00000188419	CHM	no	complete	0.932	0.724	-0.208	0.0220382	TRUE
isoComp_00110382	geneComp_00015950	ENST00000438150	ENSG00000198538	ZNF28	no	complete	0.595	0.418	-0.176	0.0220382	TRUE
isoComp_00021836	geneComp_00002556	ENST00000218516	ENSG00000102393	GLA	no	complete	0.5	0.237	-0.263	0.0221763	TRUE
isoComp_00147990	geneComp_00037867	ENST00000608255	ENSG00000272602	ZNF595	no	complete	0.445	0.228	-0.218	0.0222462	TRUE
isoComp_00028181	geneComp_00003330	ENST00000369452	ENSG00000108061	SHOC2	no	complete	0.641	0.369	-0.272	0.0225177	FALSE
isoComp_00064372	geneComp_00008161	ENST00000470699	ENSG00000144824	PHLDB2	no	complete	0.139	0.016	-0.122	0.0227213	TRUE
isoComp_00032414	geneComp_00003872	ENST00000461700	ENSG00000112425	EPM2A	no	complete	0.485	0.033	-0.452	0.022986	TRUE
isoComp_00022763	geneComp_00002669	ENST00000567172	ENSG00000103245	CIAO3	no	complete	0.372	0.204	-0.167	0.0230601	NA
isoComp_00043914	geneComp_00005480	ENST00000706830	ENSG00000126001	CEP250	no	complete	0.166	0.055	-0.111	0.0232825	TRUE
isoComp_00030317	geneComp_00003586	ENST00000538919	ENSG00000110200	ANAPC15	no	complete	0.39	0.135	-0.255	0.0233754	TRUE
isoComp_00029601	geneComp_00003502	ENST00000262995	ENSG00000109458	GAB1	no	complete	0.504	0.228	-0.275	0.0234131	FALSE
isoComp_00004915	geneComp_00000567	ENST00000295802	ENSG00000042445	RETSAT	no	complete	0.951	0.833	-0.117	0.0234205	NA
isoComp_00117610	geneComp_00019598	ENST00000318010	ENSG00000214013	GANC	no	complete	0.823	0.639	-0.183	0.0237636	TRUE
isoComp_00011510	geneComp_00001285	ENST00000542140	ENSG00000076053	RBM7	no	complete	0.201	0.014	-0.187	0.023937	TRUE
isoComp_00133719	geneComp_00028649	ENST00000524264	ENSG00000245275	SAP30L-AS1	no	complete	0.578	0.422	-0.156	0.0239741	FALSE
isoComp_00061191	geneComp_00007714	ENST00000586569	ENSG00000141655	TNFRSF11A	no	complete	0.64	0.538	-0.102	0.0240124	TRUE
isoComp_00094741	geneComp_00012858	ENST00000482010	ENSG00000175470	PPP2R2D	no	complete	0.335	0.138	-0.196	0.0240795	TRUE
isoComp_00126070	geneComp_00024304	ENST00000607066	ENSG00000231889	TRAF3IP2-AS1	no	complete	0.21	0.065	-0.145	0.0241665	FALSE
isoComp_00087634	geneComp_00011656	ENST00000446465	ENSG00000168917	SLC35G2	no	complete	0.737	0.49	-0.247	0.0242547	TRUE
isoComp_00105803	geneComp_00015159	ENST00000470258	ENSG00000188811	NHLRC3	no	complete	0.132	0.008	-0.123	0.0243654	TRUE
isoComp_00072934	geneComp_00009426	ENST00000675111	ENSG00000156709	AIFM1	no	complete	0.3	0.066	-0.234	0.0244805	FALSE
isoComp_00094885	geneComp_00012887	ENST00000412446	ENSG00000175611	ERCC6L2-AS1	no	complete	0.44	0.093	-0.347	0.0245741	FALSE
isoComp_00095106	geneComp_00012932	ENST00000566237	ENSG00000175938	ORAI3	no	complete	0.173	0.024	-0.149	0.0246472	TRUE
isoComp_00138612	geneComp_00031498	ENST00000528551	ENSG00000254614	CAPN1-AS1	no	complete	0.408	0.144	-0.264	0.0246472	FALSE
isoComp_00051703	geneComp_00006517	ENST00000491717	ENSG00000134363	FST	no	complete	0.317	0.111	-0.206	0.0247028	TRUE
isoComp_00109806	geneComp_00015851	ENST00000374431	ENSG00000198121	LPAR1	no	complete	0.739	0.508	-0.232	0.0247334	TRUE
isoComp_00037184	geneComp_00004467	ENST00000374893	ENSG00000117298	ECE1	no	complete	0.587	0.173	-0.414	0.0248169	FALSE
isoComp_00002865	geneComp_00000327	ENST00000369808	ENSG00000013563	DNASE1L1	no	complete	0.809	0.537	-0.272	0.0249499	FALSE
isoComp_00145667	geneComp_00036184	ENST00000585940	ENSG00000267523	NA	no	complete	0.993	0.811	-0.182	0.0249516	FALSE
isoComp_00019130	geneComp_00002182	ENST00000449084	ENSG00000100336	APOL4	no	complete	0.151	0.014	-0.137	0.0253629	TRUE
isoComp_00052446	geneComp_00006610	ENST00000504915	ENSG00000134982	APC	no	complete	0.382	0.08	-0.301	0.0255409	TRUE
isoComp_00034988	geneComp_00004189	ENST00000696453	ENSG00000115290	GRB14	no	complete	0.364	0.092	-0.273	0.0256654	TRUE
isoComp_00005266	geneComp_00000611	ENST00000426837	ENSG00000047849	MAP4	no	complete	0.349	0.196	-0.153	0.0262199	FALSE
isoComp_00091772	geneComp_00012387	ENST00000555345	ENSG00000172590	MRPL52	no	complete	0.459	0.185	-0.274	0.0266021	TRUE
isoComp_00122351	geneComp_00022189	ENST00000662554	ENSG00000226648	PLCG1-AS1	no	complete	0.985	0.79	-0.195	0.0266975	FALSE
isoComp_00023368	geneComp_00002742	ENST00000559966	ENSG00000103888	CEMIP	no	complete	0.2	0.039	-0.161	0.0267565	TRUE
isoComp_00158527	geneComp_00045317	ENST00000462560	ENSG00000293427	NA	no	complete	0.669	0.289	-0.38	0.0274184	NA
isoComp_00052256	geneComp_00006589	ENST00000513033	ENSG00000134852	CLOCK	no	complete	0.151	0.023	-0.128	0.027511	FALSE
isoComp_00057543	geneComp_00007293	ENST00000335927	ENSG00000138670	RASGEF1B	no	complete	0.259	0.026	-0.233	0.027511	TRUE
isoComp_00126247	geneComp_00024391	ENST00000615718	ENSG00000232118	BACH1-AS1	no	complete	0.927	0.68	-0.247	0.027511	FALSE
isoComp_00098211	geneComp_00013556	ENST00000389623	ENSG00000179954	SSC5D	no	complete	0.998	0.834	-0.164	0.0275764	TRUE
isoComp_00015487	geneComp_00001744	ENST00000552111	ENSG00000089022	MAPKAPK5	no	complete	0.062	0.172	0.11	0.0277214	TRUE
isoComp_00044931	geneComp_00005615	ENST00000392965	ENSG00000127507	ADGRE2	no	complete	0.135	0.023	-0.112	0.0277214	TRUE
isoComp_00010783	geneComp_00001210	ENST00000377214	ENSG00000074219	TEAD2	no	complete	0.557	0.33	-0.226	0.0279042	FALSE
isoComp_00069974	geneComp_00008974	ENST00000338635	ENSG00000152422	XRCC4	no	complete	0.649	0.323	-0.327	0.0280951	TRUE
isoComp_00010756	geneComp_00001206	ENST00000177742	ENSG00000074071	MRPS34	no	complete	0.45	0.236	-0.214	0.028184	TRUE
isoComp_00157734	geneComp_00044957	ENST00000687350	ENSG00000291176	NA	no	complete	0.181	0.015	-0.167	0.028184	TRUE
isoComp_00098966	geneComp_00013755	ENST00000458143	ENSG00000181220	ZNF746	no	complete	0.405	0.134	-0.271	0.0282012	TRUE
isoComp_00123552	geneComp_00022855	ENST00000598961	ENSG00000228302	NA	no	complete	0.974	0.673	-0.301	0.028242	FALSE
isoComp_00034710	geneComp_00004150	ENST00000698509	ENSG00000115085	ZAP70	no	complete	0.256	0.032	-0.224	0.0283213	TRUE
isoComp_00030519	geneComp_00003614	ENST00000326656	ENSG00000110536	PTPMT1	no	complete	0.465	0.294	-0.171	0.0283914	TRUE
isoComp_00075348	geneComp_00009775	ENST00000291107	ENSG00000159842	ABR	no	complete	0.25	0.149	-0.101	0.028456	TRUE
isoComp_00060500	geneComp_00007645	ENST00000584580	ENSG00000141294	LRRC46	no	complete	0.5	0.946	0.446	0.0284975	TRUE
isoComp_00122741	geneComp_00022348	ENST00000688945	ENSG00000227039	ITGB2-AS1	no	complete	0.438	0.068	-0.37	0.0287167	FALSE
isoComp_00084535	geneComp_00011220	ENST00000566882	ENSG00000166946	CCNDBP1	no	complete	0.11	0.23	0.119	0.0291404	TRUE
isoComp_00097933	geneComp_00013509	ENST00000532522	ENSG00000179632	MAF1	no	complete	0.358	0.189	-0.169	0.0291404	FALSE
isoComp_00147385	geneComp_00037433	ENST00000616498	ENSG00000271605	MILR1	no	complete	0.194	0.039	-0.155	0.029197	TRUE
isoComp_00099068	geneComp_00013784	ENST00000590289	ENSG00000181513	ACBD4	no	complete	0.162	0.041	-0.121	0.0293087	TRUE
isoComp_00024462	geneComp_00002851	ENST00000264071	ENSG00000104833	TUBB4A	no	complete	1	0.843	-0.157	0.0294927	TRUE
isoComp_00093251	geneComp_00012609	ENST00000690666	ENSG00000173852	DPY19L1	no	complete	0.464	0.363	-0.1	0.0296517	NA
isoComp_00109974	geneComp_00015882	ENST00000381529	ENSG00000198223	CSF2RA	no	complete	0.401	0.2	-0.201	0.029758	TRUE
isoComp_00072980	geneComp_00009432	ENST00000523984	ENSG00000156795	NTAQ1	no	complete	0.408	0.156	-0.252	0.0299366	TRUE
isoComp_00132546	geneComp_00028012	ENST00000631605	ENSG00000242612	DECR2	no	complete	0.437	0.01	-0.428	0.0300818	TRUE
isoComp_00100627	geneComp_00014065	ENST00000331479	ENSG00000183172	SMDT1	no	complete	0.662	0.78	0.118	0.0301732	TRUE
isoComp_00075468	geneComp_00009794	ENST00000483009	ENSG00000160050	CCDC28B	no	complete	0.357	0.077	-0.28	0.0305744	TRUE
isoComp_00106979	geneComp_00015398	ENST00000448051	ENSG00000196437	ZNF569	no	complete	0.996	0.117	-0.879	0.0306133	TRUE
isoComp_00134005	geneComp_00028714	ENST00000664105	ENSG00000246273	SBF2-AS1	no	complete	0.231	0.031	-0.2	0.030881	TRUE
isoComp_00051059	geneComp_00006435	ENST00000377313	ENSG00000133895	MEN1	no	complete	0.195	0.034	-0.161	0.0312193	TRUE
isoComp_00095426	geneComp_00013008	ENST00000409785	ENSG00000176407	KCMF1	no	complete	0.877	0.647	-0.23	0.0314329	TRUE
isoComp_00013907	geneComp_00001552	ENST00000391694	ENSG00000083838	ZNF446	no	complete	0.508	0.033	-0.475	0.0314777	TRUE
isoComp_00037809	geneComp_00004551	ENST00000264021	ENSG00000118096	IFT46	no	complete	0.417	0.169	-0.248	0.0317661	TRUE
isoComp_00113471	geneComp_00017493	ENST00000477826	ENSG00000204348	DXO	no	complete	0.195	0.08	-0.115	0.031857	NA
isoComp_00149988	geneComp_00039478	ENST00000620399	ENSG00000276997	NA	no	complete	0.265	0.137	-0.128	0.0319493	FALSE
isoComp_00055851	geneComp_00007076	ENST00000497194	ENSG00000137496	IL18BP	no	complete	0.676	0.486	-0.189	0.0320316	TRUE
isoComp_00033851	geneComp_00004053	ENST00000273480	ENSG00000114125	RNF7	no	complete	0.742	0.617	-0.125	0.0323872	TRUE
isoComp_00039983	geneComp_00004870	ENST00000518379	ENSG00000120915	EPHX2	no	complete	0.331	0.022	-0.31	0.0323872	FALSE
isoComp_00070685	geneComp_00009078	ENST00000283285	ENSG00000153283	CD96	no	complete	0.428	0.327	-0.101	0.0323872	FALSE
isoComp_00071252	geneComp_00009168	ENST00000284376	ENSG00000154222	CC2D1B	no	complete	0.46	0.27	-0.19	0.0325149	TRUE
isoComp_00036591	geneComp_00004377	ENST00000494710	ENSG00000116675	DNAJC6	no	complete	0.126	0.02	-0.106	0.0326562	TRUE
isoComp_00062049	geneComp_00007842	ENST00000610703	ENSG00000142875	PRKACB	no	complete	0.188	0.009	-0.179	0.0327759	TRUE
isoComp_00086192	geneComp_00011461	ENST00000301773	ENSG00000167994	RAB3IL1	no	complete	0.244	0.048	-0.196	0.0328336	FALSE
isoComp_00131996	geneComp_00027721	ENST00000487814	ENSG00000241560	ZBTB20-AS1	no	complete	0.136	0.033	-0.103	0.0328734	FALSE
isoComp_00069662	geneComp_00008913	ENST00000512085	ENSG00000151881	TMEM267	no	complete	0.283	0.11	-0.173	0.0329321	FALSE
isoComp_00090397	geneComp_00012157	ENST00000589521	ENSG00000171443	ZNF524	no	complete	0.211	0.012	-0.199	0.0333613	TRUE
isoComp_00086597	geneComp_00011506	ENST00000307602	ENSG00000168172	HOOK3	no	complete	0.465	0.682	0.217	0.0336166	FALSE
isoComp_00077161	geneComp_00010029	ENST00000293831	ENSG00000161960	EIF4A1	no	complete	0.328	0.446	0.119	0.0336911	TRUE
isoComp_00043472	geneComp_00005404	ENST00000595369	ENSG00000125731	SH2D3A	no	complete	0.511	0.402	-0.109	0.0337221	TRUE
isoComp_00109574	geneComp_00015807	ENST00000474361	ENSG00000197976	AKAP17A	no	complete	0.463	0.181	-0.281	0.0339653	TRUE
isoComp_00141332	geneComp_00033217	ENST00000656865	ENSG00000259248	USP3-AS1	no	complete	0.433	0.031	-0.402	0.0339948	FALSE
isoComp_00079800	geneComp_00010468	ENST00000296137	ENSG00000163820	FYCO1	no	complete	0.944	0.749	-0.194	0.0340437	TRUE
isoComp_00053524	geneComp_00006748	ENST00000518148	ENSG00000135722	FBXL8	no	complete	0.997	0.662	-0.335	0.0342512	TRUE
isoComp_00099296	geneComp_00013836	ENST00000318110	ENSG00000181896	ZNF101	no	complete	0.147	0.032	-0.115	0.0343035	TRUE
isoComp_00118120	geneComp_00019769	ENST00000381223	ENSG00000214717	ZBED1	no	complete	0.457	0.308	-0.15	0.0345711	FALSE
isoComp_00068616	geneComp_00008767	ENST00000341749	ENSG00000150527	MIA2	no	complete	0.598	0.23	-0.368	0.0348848	FALSE
isoComp_00082877	geneComp_00010975	ENST00000298815	ENSG00000165895	ARHGAP42	no	complete	0.982	0.818	-0.164	0.0349241	TRUE
isoComp_00085310	geneComp_00011327	ENST00000564238	ENSG00000167523	SPATA33	no	complete	0.784	0.5	-0.284	0.0350262	TRUE
isoComp_00105980	geneComp_00015207	ENST00000343075	ENSG00000189046	ALKBH2	no	complete	0.483	0.159	-0.324	0.0350348	TRUE
isoComp_00126439	geneComp_00024530	ENST00000444503	ENSG00000232490	OSBPL10-AS1	no	complete	0.322	0.129	-0.192	0.0352966	FALSE
isoComp_00058570	geneComp_00007429	ENST00000603680	ENSG00000139629	GALNT6	no	complete	0	0.105	0.105	0.0353729	FALSE
isoComp_00010850	geneComp_00001218	ENST00000538383	ENSG00000074527	NTN4	no	complete	0.311	0.023	-0.288	0.0354048	TRUE
isoComp_00094300	geneComp_00012791	ENST00000374271	ENSG00000175087	PDIK1L	no	complete	0.5	0.24	-0.26	0.0355207	FALSE
isoComp_00047074	geneComp_00005919	ENST00000598811	ENSG00000130313	PGLS	no	complete	0.503	0.335	-0.168	0.0357386	TRUE
isoComp_00019710	geneComp_00002253	ENST00000674802	ENSG00000100578	KIAA0586	no	complete	0.202	0.067	-0.135	0.0358461	TRUE
isoComp_00107489	geneComp_00015468	ENST00000535834	ENSG00000196684	HSH2D	no	complete	0.139	0.006	-0.133	0.0359412	TRUE
isoComp_00046846	geneComp_00005886	ENST00000693263	ENSG00000130159	ECSIT	no	complete	0.387	0.187	-0.2	0.0360306	TRUE
isoComp_00065674	geneComp_00008372	ENST00000357727	ENSG00000146592	CREB5	no	complete	0.471	0.32	-0.151	0.0360306	TRUE
isoComp_00079075	geneComp_00010361	ENST00000522202	ENSG00000163517	HDAC11	no	complete	0.404	0.028	-0.376	0.0360306	TRUE
isoComp_00156508	geneComp_00044653	ENST00000380336	ENSG00000290746	CA5BP1	no	complete	0.479	0.26	-0.219	0.0360306	FALSE
isoComp_00143929	geneComp_00034972	ENST00000582096	ENSG00000264112	NA	no	complete	0.682	0.342	-0.34	0.036114	TRUE
isoComp_00065867	geneComp_00008403	ENST00000275820	ENSG00000146909	NOM1	no	complete	0.97	0.611	-0.358	0.0361148	TRUE
isoComp_00021589	geneComp_00002516	ENST00000376521	ENSG00000102100	SLC35A2	no	complete	0.79	0.403	-0.387	0.0361219	TRUE
isoComp_00077984	geneComp_00010169	ENST00000368072	ENSG00000162735	PEX19	no	complete	0.781	0.56	-0.221	0.0361881	TRUE
isoComp_00035164	geneComp_00004207	ENST00000394555	ENSG00000115380	EFEMP1	no	complete	0.646	0.454	-0.192	0.0363445	TRUE
isoComp_00091222	geneComp_00012295	ENST00000507348	ENSG00000172058	SERF1A	no	complete	0.221	0.049	-0.172	0.0363445	TRUE
isoComp_00058349	geneComp_00007398	ENST00000392872	ENSG00000139372	TDG	no	complete	0.592	0.392	-0.2	0.0369293	TRUE
isoComp_00004151	geneComp_00000478	ENST00000431317	ENSG00000032219	ARID4A	no	complete	0.371	0.065	-0.306	0.0370179	TRUE
isoComp_00038962	geneComp_00004715	ENST00000354366	ENSG00000119720	NRDE2	no	complete	0.861	0.691	-0.17	0.0370323	TRUE
isoComp_00022179	geneComp_00002605	ENST00000412082	ENSG00000102897	LYRM1	no	complete	0.302	0.027	-0.275	0.0370558	TRUE
isoComp_00108028	geneComp_00015553	ENST00000394152	ENSG00000197037	ZSCAN25	no	complete	0.339	0.188	-0.151	0.037578	TRUE
isoComp_00088062	geneComp_00011723	ENST00000495458	ENSG00000169228	RAB24	no	complete	0.164	0.055	-0.109	0.0377232	TRUE
isoComp_00127810	geneComp_00025316	ENST00000423484	ENSG00000234444	ZNF736	no	complete	0.297	0.584	0.287	0.037986	TRUE
isoComp_00069186	geneComp_00008846	ENST00000497508	ENSG00000151353	TMEM18	no	complete	0	0.233	0.233	0.0381336	TRUE
isoComp_00136052	geneComp_00029741	ENST00000511699	ENSG00000250608	NUDT16-DT	no	complete	0.235	0.046	-0.189	0.0381813	TRUE
isoComp_00081653	geneComp_00010766	ENST00000520337	ENSG00000164932	CTHRC1	no	complete	0.149	0.267	0.118	0.0382074	TRUE
isoComp_00121822	geneComp_00021872	ENST00000543656	ENSG00000225855	RUSC1-AS1	no	complete	0.564	0.34	-0.224	0.0382526	TRUE
isoComp_00005476	geneComp_00000632	ENST00000683216	ENSG00000049167	ERCC8	no	complete	0	0.113	0.113	0.0384569	TRUE
isoComp_00023640	geneComp_00002771	ENST00000523132	ENSG00000104219	ZDHHC2	no	complete	0.485	0.267	-0.217	0.0384569	TRUE
isoComp_00085877	geneComp_00011417	ENST00000301475	ENSG00000167785	ZNF558	no	complete	0.627	0.207	-0.419	0.0384821	TRUE
isoComp_00081151	geneComp_00010691	ENST00000683432	ENSG00000164610	RP9	no	complete	0.262	0.111	-0.151	0.03862	TRUE
isoComp_00043363	geneComp_00005386	ENST00000537335	ENSG00000125630	POLR1B	no	complete	0.38	0.053	-0.327	0.0386457	TRUE
isoComp_00089838	geneComp_00012046	ENST00000370963	ENSG00000170899	GSTA4	no	complete	0.628	0.386	-0.242	0.0387586	FALSE
isoComp_00076483	geneComp_00009932	ENST00000497613	ENSG00000160949	TONSL	no	complete	0.763	0.613	-0.151	0.0388797	TRUE
isoComp_00009910	geneComp_00001132	ENST00000553384	ENSG00000072042	RDH11	no	complete	0.145	0.03	-0.116	0.0389387	TRUE
isoComp_00009390	geneComp_00001070	ENST00000621441	ENSG00000070367	EXOC5	no	complete	0.881	0.663	-0.218	0.0389497	NA
isoComp_00020207	geneComp_00002309	ENST00000261479	ENSG00000100902	PSMA6	no	complete	0.745	0.478	-0.267	0.0389646	NA
isoComp_00105075	geneComp_00014962	ENST00000324822	ENSG00000187838	PLSCR3	no	complete	0.211	0.042	-0.169	0.0389646	TRUE
isoComp_00067795	geneComp_00008659	ENST00000530203	ENSG00000149231	CCDC82	no	complete	0.152	0.02	-0.133	0.0390383	TRUE
isoComp_00022266	geneComp_00002615	ENST00000613167	ENSG00000102934	PLLP	no	complete	0.789	0.647	-0.142	0.0390448	FALSE
isoComp_00082354	geneComp_00010899	ENST00000533628	ENSG00000165526	RPUSD4	no	complete	0.355	0.027	-0.328	0.0390664	TRUE
isoComp_00104598	geneComp_00014858	ENST00000602253	ENSG00000187187	ZNF546	no	complete	0.245	0.04	-0.205	0.0395285	TRUE
isoComp_00062938	geneComp_00007970	ENST00000462880	ENSG00000143553	SNAPIN	no	complete	0.216	0.079	-0.137	0.039642	TRUE
isoComp_00055248	geneComp_00006995	ENST00000520082	ENSG00000136999	CCN3	no	complete	0.5	0.042	-0.458	0.039733	TRUE
isoComp_00114335	geneComp_00017657	ENST00000552460	ENSG00000204954	UQCC6	no	complete	0.251	0.032	-0.219	0.0401755	TRUE
isoComp_00114168	geneComp_00017628	ENST00000524906	ENSG00000204839	MROH6	no	complete	0.182	0.013	-0.169	0.0402736	TRUE
isoComp_00062664	geneComp_00007934	ENST00000361936	ENSG00000143409	MINDY1	no	complete	0.498	0.387	-0.111	0.0404335	NA
isoComp_00011582	geneComp_00001292	ENST00000209884	ENSG00000076321	KLHL20	no	complete	0.875	0.739	-0.137	0.0410395	TRUE
isoComp_00126438	geneComp_00024530	ENST00000436598	ENSG00000232490	OSBPL10-AS1	no	complete	0.189	0.053	-0.136	0.0410395	FALSE
isoComp_00089428	geneComp_00011960	ENST00000329043	ENSG00000170448	NFXL1	no	complete	0.19	0.085	-0.105	0.0412276	TRUE
isoComp_00067346	geneComp_00008599	ENST00000322680	ENSG00000148660	CAMK2G	no	complete	0.179	0.072	-0.107	0.0412343	TRUE
isoComp_00119026	geneComp_00020169	ENST00000641009	ENSG00000218510	LINC00339	no	complete	0.71	0.402	-0.308	0.0415018	TRUE
isoComp_00035582	geneComp_00004255	ENST00000496443	ENSG00000115661	STK16	no	complete	0.285	0.075	-0.209	0.041646	TRUE
isoComp_00145249	geneComp_00035949	ENST00000591056	ENSG00000267106	ZNF561-AS1	no	complete	0.211	0.042	-0.169	0.0417279	TRUE
isoComp_00145534	geneComp_00036106	ENST00000658494	ENSG00000267374	MIR924HG	no	complete	0.425	0.163	-0.262	0.0418448	FALSE
isoComp_00004246	geneComp_00000487	ENST00000673929	ENSG00000033170	FUT8	no	complete	0.597	0.49	-0.107	0.0418683	FALSE
isoComp_00157041	geneComp_00044859	ENST00000687685	ENSG00000291066	NA	no	complete	0.129	0.015	-0.114	0.0419109	FALSE
isoComp_00134615	geneComp_00028934	ENST00000508424	ENSG00000248445	SEMA6A-AS1	no	complete	0.551	0.241	-0.31	0.0419261	FALSE
isoComp_00047448	geneComp_00005968	ENST00000360442	ENSG00000130669	PAK4	no	complete	0.798	0.341	-0.457	0.0420205	FALSE
isoComp_00043053	geneComp_00005334	ENST00000342624	ENSG00000125247	TMTC4	no	complete	0.749	0.442	-0.307	0.042028	TRUE
isoComp_00065765	geneComp_00008387	ENST00000450302	ENSG00000146757	ZNF92	no	complete	0.296	0.035	-0.261	0.0420591	FALSE
isoComp_00083266	geneComp_00011044	ENST00000532129	ENSG00000166199	ALKBH3	no	complete	0.21	0.041	-0.17	0.0421346	TRUE
isoComp_00035809	geneComp_00004277	ENST00000422440	ENSG00000115840	SLC25A12	no	complete	0.795	0.528	-0.268	0.0425457	TRUE
isoComp_00005699	geneComp_00000653	ENST00000683431	ENSG00000050165	DKK3	no	complete	0.549	0.231	-0.318	0.0425471	TRUE
isoComp_00081698	geneComp_00010774	ENST00000297596	ENSG00000164949	GEM	no	complete	0.662	0.492	-0.17	0.0425471	TRUE
isoComp_00138014	geneComp_00031091	ENST00000338368	ENSG00000253729	PRKDC	no	complete	0.179	0.302	0.123	0.0429096	TRUE
isoComp_00067624	geneComp_00008637	ENST00000469480	ENSG00000149016	TUT1	no	complete	0.566	0.437	-0.13	0.0430963	TRUE
isoComp_00058006	geneComp_00007337	ENST00000435822	ENSG00000138867	GUCD1	no	complete	0.803	0.522	-0.281	0.0434054	TRUE
isoComp_00155518	geneComp_00043927	ENST00000685922	ENSG00000289318	NA	no	complete	0.987	0.887	-0.101	0.0435026	FALSE
isoComp_00087186	geneComp_00011590	ENST00000446571	ENSG00000168591	TMUB2	no	complete	0.34	0.073	-0.267	0.0435106	TRUE
isoComp_00108083	geneComp_00015563	ENST00000623276	ENSG00000197062	ZSCAN26	no	complete	0.274	0.09	-0.184	0.0435434	FALSE
isoComp_00097748	geneComp_00013467	ENST00000374943	ENSG00000179344	HLA-DQB1	no	complete	0.256	0.064	-0.192	0.0435534	TRUE
isoComp_00100988	geneComp_00014149	ENST00000436087	ENSG00000183621	ZNF438	no	complete	0.262	0.085	-0.177	0.04374	TRUE
isoComp_00158506	geneComp_00045305	ENST00000616283	ENSG00000293413	NA	no	complete	0.169	0.042	-0.127	0.0440317	TRUE
isoComp_00126891	geneComp_00024768	ENST00000657621	ENSG00000233058	ATP13A3-DT	no	complete	0.47	0.141	-0.33	0.0441215	TRUE
isoComp_00076506	geneComp_00009935	ENST00000688394	ENSG00000160957	RECQL4	no	complete	0.009	0.153	0.144	0.0441781	TRUE
isoComp_00020409	geneComp_00002330	ENST00000262460	ENSG00000101003	GINS1	no	complete	0.611	0.352	-0.259	0.0442405	TRUE
isoComp_00052550	geneComp_00006623	ENST00000377216	ENSG00000135063	ENTREP1	no	complete	0.169	0.065	-0.104	0.0443186	TRUE
isoComp_00099049	geneComp_00013780	ENST00000449609	ENSG00000181458	TMEM45A	no	complete	0.209	0.092	-0.117	0.0444629	TRUE
isoComp_00017986	geneComp_00002027	ENST00000602117	ENSG00000099785	MARCHF2	no	complete	0.739	0.395	-0.345	0.0445974	FALSE
isoComp_00080299	geneComp_00010537	ENST00000485535	ENSG00000164050	PLXNB1	no	complete	0.314	0.203	-0.111	0.0446436	TRUE
isoComp_00145252	geneComp_00035949	ENST00000661696	ENSG00000267106	ZNF561-AS1	no	complete	0	0.157	0.157	0.044842	TRUE
isoComp_00087165	geneComp_00011586	ENST00000634363	ENSG00000168566	SNRNP48	no	complete	0.158	0.035	-0.123	0.0449173	TRUE
isoComp_00122015	geneComp_00021986	ENST00000703582	ENSG00000226124	FTCDNL1	no	complete	0.439	0.079	-0.36	0.04528	TRUE
isoComp_00102174	geneComp_00014392	ENST00000463376	ENSG00000184887	BTBD6	no	complete	0.321	0.19	-0.131	0.0454055	TRUE
isoComp_00093327	geneComp_00012623	ENST00000504239	ENSG00000173926	MARCHF3	no	complete	0.404	0.285	-0.119	0.0454226	FALSE
isoComp_00019022	geneComp_00002166	ENST00000551731	ENSG00000100299	ARSA	no	complete	0.026	0.189	0.162	0.0456985	TRUE
isoComp_00037467	geneComp_00004506	ENST00000706595	ENSG00000117569	PTBP2	no	complete	0.815	0.623	-0.192	0.0456985	NA
isoComp_00059994	geneComp_00007599	ENST00000424011	ENSG00000140931	CMTM3	no	complete	0.166	0.035	-0.131	0.0459829	FALSE
isoComp_00014188	geneComp_00001588	ENST00000380822	ENSG00000085231	AK6	no	complete	0.278	0.674	0.396	0.0464075	TRUE
isoComp_00134247	geneComp_00028785	ENST00000634992	ENSG00000247595	MISFA	no	complete	0.558	0.205	-0.353	0.0465194	TRUE
isoComp_00086537	geneComp_00011494	ENST00000488682	ENSG00000168116	KIAA1586	no	complete	0.543	0.119	-0.425	0.0466939	TRUE
isoComp_00065751	geneComp_00008385	ENST00000275605	ENSG00000146733	PSPH	no	complete	0.475	0.176	-0.299	0.0470782	TRUE
isoComp_00035416	geneComp_00004231	ENST00000639867	ENSG00000115525	ST3GAL5	no	complete	0.3	0.079	-0.221	0.0472236	FALSE
isoComp_00141987	geneComp_00033669	ENST00000565573	ENSG00000260083	MIR762HG	no	complete	0.313	0.138	-0.176	0.0472236	FALSE
isoComp_00018303	geneComp_00002071	ENST00000382363	ENSG00000099999	RNF215	no	complete	0.971	0.367	-0.605	0.0473013	TRUE
isoComp_00094567	geneComp_00012831	ENST00000524224	ENSG00000175305	CCNE2	no	complete	0.378	0.272	-0.106	0.0474366	FALSE
isoComp_00030807	geneComp_00003644	ENST00000288532	ENSG00000110871	COQ5	no	complete	0.934	0.768	-0.166	0.0475858	FALSE
isoComp_00133049	geneComp_00028314	ENST00000663366	ENSG00000243701	DUBR	no	complete	0.193	0.027	-0.165	0.0478054	FALSE
isoComp_00094130	geneComp_00012768	ENST00000561540	ENSG00000174943	KCTD13	no	complete	0.465	0.309	-0.156	0.0480379	TRUE
isoComp_00139816	geneComp_00032242	ENST00000536670	ENSG00000256591	NA	no	complete	0.339	0.069	-0.27	0.0480854	FALSE
isoComp_00015500	geneComp_00001745	ENST00000541716	ENSG00000089041	P2RX7	no	complete	0.176	0.004	-0.172	0.0482562	TRUE
isoComp_00039381	geneComp_00004775	ENST00000517946	ENSG00000120159	CAAP1	no	complete	0.213	0.013	-0.199	0.0484894	FALSE
isoComp_00129172	geneComp_00026017	ENST00000453015	ENSG00000236200	KDM4A-AS1	no	complete	0.188	0.033	-0.155	0.049187	FALSE
isoComp_00034665	geneComp_00004146	ENST00000447036	ENSG00000115042	FAHD2A	no	complete	0.45	0.148	-0.302	0.0491931	FALSE
isoComp_00045747	geneComp_00005730	ENST00000489702	ENSG00000128604	IRF5	no	complete	0.135	0.01	-0.125	0.0492159	TRUE
isoComp_00017909	geneComp_00002017	ENST00000262519	ENSG00000099381	SETD1A	no	complete	0.243	0.122	-0.121	0.0492934	FALSE
isoComp_00030003	geneComp_00003547	ENST00000639570	ENSG00000109911	ELP4	no	complete	0.75	0.539	-0.211	0.0496825	FALSE
isoComp_00082040	geneComp_00010841	ENST00000685264	ENSG00000165240	ATP7A	no	complete	0.168	0.056	-0.113	0.0497044	TRUE
isoComp_00099507	geneComp_00013871	ENST00000381297	ENSG00000182162	P2RY8	no	complete	0.789	0.913	0.123	0.0497044	TRUE
isoComp_00066896	geneComp_00008536	ENST00000374242	ENSG00000148153	INIP	no	complete	0.856	0.961	0.106	0.0499207	FALSE
isoComp_00001024	geneComp_00000115	ENST00000579728	ENSG00000006025	OSBPL7	no	complete	0.492	0.048	-0.444	0.0499465	TRUE
isoComp_00072081	geneComp_00009289	ENST00000685571	ENSG00000155393	HEATR3	no	complete	0.412	0.194	-0.218	0.0499465	TRUE
isoComp_00234424	geneComp_00055211	ENST00000343687	ENSG00000160179	ABCG1	no	partial	0.645	0.039	-0.606	3.4654e-15	TRUE
isoComp_00192679	geneComp_00049452	ENST00000477393	ENSG00000114125	RNF7	no	partial	0.141	0.01	-0.131	3.82279e-13	TRUE
isoComp_00190412	geneComp_00049134	ENST00000551980	ENSG00000111647	BLTP3B	no	partial	0.144	0.003	-0.141	7.72416e-12	TRUE
isoComp_00279355	geneComp_00066534	ENST00000551631	ENSG00000224078	SNHG14	no	partial	0.264	0.033	-0.231	3.31542e-11	FALSE
isoComp_00202883	geneComp_00050893	ENST00000554974	ENSG00000126215	XRCC3	no	partial	0.278	0	-0.278	9.52286e-11	TRUE
isoComp_00228855	geneComp_00054382	ENST00000378201	ENSG00000152464	RPP38	no	partial	0.189	0.018	-0.171	3.03814e-10	TRUE
isoComp_00290469	geneComp_00072928	ENST00000468071	ENSG00000240857	RDH14	no	partial	0.217	0	-0.217	7.08537e-10	FALSE
isoComp_00166995	geneComp_00046335	ENST00000373552	ENSG00000066248	NGEF	no	partial	0.294	0.046	-0.248	1.57776e-09	TRUE
isoComp_00238398	geneComp_00055832	ENST00000383811	ENSG00000163703	CRELD1	no	partial	0.321	0.008	-0.312	9.46191e-09	TRUE
isoComp_00290468	geneComp_00072928	ENST00000381249	ENSG00000240857	RDH14	no	partial	0.783	1	0.217	1.38994e-08	FALSE
isoComp_00200007	geneComp_00050428	ENST00000651779	ENSG00000122644	ARL4A	no	partial	0.228	0.009	-0.22	2.08181e-08	FALSE
isoComp_00288254	geneComp_00071575	ENST00000609615	ENSG00000236581	STARD13-AS	no	partial	0.181	0.026	-0.155	2.28355e-08	TRUE
isoComp_00228186	geneComp_00054267	ENST00000693576	ENSG00000151503	NCAPD3	no	partial	0.129	0.004	-0.125	6.04298e-08	TRUE
isoComp_00216446	geneComp_00052698	ENST00000693334	ENSG00000138688	BLTP1	no	partial	0.137	0.03	-0.107	6.22715e-08	TRUE
isoComp_00263020	geneComp_00060167	ENST00000624862	ENSG00000186654	PRR5	no	partial	0.238	0.002	-0.236	6.7565e-08	TRUE
isoComp_00305208	geneComp_00082046	ENST00000612051	ENSG00000269335	IKBKG	no	partial	0.411	0	-0.411	6.7565e-08	TRUE
isoComp_00181634	geneComp_00048071	ENST00000569604	ENSG00000103253	HAGHL	no	partial	0.308	0	-0.308	1.58804e-07	TRUE
isoComp_00259362	geneComp_00059440	ENST00000545021	ENSG00000183060	LYSMD4	no	partial	0.409	0.034	-0.374	2.09658e-07	TRUE
isoComp_00164252	geneComp_00046026	ENST00000637215	ENSG00000048740	CELF2	no	partial	0.213	0.055	-0.158	2.34413e-07	TRUE
isoComp_00170827	geneComp_00046737	ENST00000600540	ENSG00000077463	SIRT6	no	partial	0.107	0.004	-0.103	3.46908e-07	TRUE
isoComp_00220595	geneComp_00053195	ENST00000594968	ENSG00000142528	ZNF473	no	partial	0.422	0.02	-0.402	3.75963e-07	TRUE
isoComp_00313923	geneComp_00088980	ENST00000687837	ENSG00000288869	SMANTIS	no	partial	0.318	0	-0.318	3.75963e-07	TRUE
isoComp_00234500	geneComp_00055223	ENST00000359624	ENSG00000160200	CBS	no	partial	0.345	0.058	-0.287	3.9515e-07	TRUE
isoComp_00182064	geneComp_00048130	ENST00000560717	ENSG00000103707	MTFMT	no	partial	0.277	0	-0.277	4.66746e-07	TRUE
isoComp_00193551	geneComp_00049552	ENST00000452780	ENSG00000115109	EPB41L5	no	partial	0.155	0.01	-0.144	5.03967e-07	TRUE
isoComp_00192848	geneComp_00049472	ENST00000429366	ENSG00000114388	NPRL2	no	partial	0.144	0.037	-0.107	5.16486e-07	TRUE
isoComp_00253516	geneComp_00058248	ENST00000374633	ENSG00000175395	ZNF25	no	partial	0.475	0	-0.475	5.16486e-07	TRUE
isoComp_00200185	geneComp_00050465	ENST00000676833	ENSG00000122966	CIT	no	partial	0.178	0.01	-0.168	6.45254e-07	TRUE
isoComp_00185938	geneComp_00048588	ENST00000698983	ENSG00000106628	POLD2	no	partial	0.116	0.003	-0.113	8.28943e-07	TRUE
isoComp_00192588	geneComp_00049444	ENST00000466072	ENSG00000114054	PCCB	no	partial	0.174	0.016	-0.158	9.60169e-07	TRUE
isoComp_00236014	geneComp_00055428	ENST00000584798	ENSG00000161960	EIF4A1	no	partial	0.221	0.095	-0.126	9.94751e-07	TRUE
isoComp_00218289	geneComp_00052941	ENST00000566479	ENSG00000140474	ULK3	no	partial	0.149	0.029	-0.119	1.16628e-06	TRUE
isoComp_00222500	geneComp_00053469	ENST00000434566	ENSG00000144182	LIPT1	no	partial	0.273	0	-0.273	1.24576e-06	TRUE
isoComp_00315993	geneComp_00090275	ENST00000700784	ENSG00000291084	ALOX12P2	no	partial	0.135	0.026	-0.109	1.24576e-06	FALSE
isoComp_00249932	geneComp_00057675	ENST00000470048	ENSG00000171962	DRC3	no	partial	0.417	0.056	-0.361	1.24591e-06	TRUE
isoComp_00219503	geneComp_00053063	ENST00000269195	ENSG00000141429	GALNT1	no	partial	0.462	0.698	0.236	1.52978e-06	TRUE
isoComp_00237109	geneComp_00055619	ENST00000535944	ENSG00000162946	DISC1	no	partial	0.328	0.007	-0.321	1.61053e-06	TRUE
isoComp_00222586	geneComp_00053484	ENST00000409673	ENSG00000144306	SCRN3	no	partial	0.155	0.024	-0.131	1.82572e-06	TRUE
isoComp_00181132	geneComp_00048020	ENST00000695711	ENSG00000102977	ACD	no	partial	0.423	0	-0.423	2.31295e-06	TRUE
isoComp_00228781	geneComp_00054365	ENST00000514838	ENSG00000152359	POC5	no	partial	0.372	0	-0.372	5.75459e-06	FALSE
isoComp_00253515	geneComp_00058248	ENST00000302609	ENSG00000175395	ZNF25	no	partial	0.525	0.992	0.466	6.11472e-06	TRUE
isoComp_00317590	geneComp_00090777	ENST00000458301	ENSG00000293510	AFG3L1P	no	partial	0.247	0.012	-0.234	6.33258e-06	FALSE
isoComp_00239039	geneComp_00055923	ENST00000359079	ENSG00000164023	SGMS2	no	partial	0.379	0	-0.379	7.90936e-06	FALSE
isoComp_00199834	geneComp_00050410	ENST00000671952	ENSG00000122507	BBS9	no	partial	0.368	0.013	-0.355	7.91748e-06	TRUE
isoComp_00250371	geneComp_00057750	ENST00000575894	ENSG00000172366	MCRIP2	no	partial	0.848	0.289	-0.559	7.91748e-06	TRUE
isoComp_00222488	geneComp_00053466	ENST00000409450	ENSG00000144152	FBLN7	no	partial	0.465	0	-0.465	8.51739e-06	TRUE
isoComp_00183749	geneComp_00048310	ENST00000600440	ENSG00000105137	SYDE1	no	partial	0.427	0.009	-0.418	1.04521e-05	FALSE
isoComp_00257846	geneComp_00059170	ENST00000490730	ENSG00000181392	SYNE4	no	partial	0.419	0	-0.419	1.40396e-05	TRUE
isoComp_00173553	geneComp_00047054	ENST00000704026	ENSG00000087074	PPP1R15A	no	partial	0.152	0.008	-0.144	1.52337e-05	TRUE
isoComp_00189453	geneComp_00049025	ENST00000682659	ENSG00000110711	AIP	no	partial	0.13	0	-0.13	1.52337e-05	TRUE
isoComp_00211471	geneComp_00052037	ENST00000543318	ENSG00000135124	P2RX4	no	partial	0.122	0.009	-0.113	2.37948e-05	TRUE
isoComp_00294782	geneComp_00075088	ENST00000523865	ENSG00000250479	CHCHD10	no	partial	0.689	0.212	-0.477	2.43975e-05	TRUE
isoComp_00262957	geneComp_00060156	ENST00000691432	ENSG00000186594	MIR22HG	no	partial	0.368	0	-0.368	2.45706e-05	TRUE
isoComp_00230482	geneComp_00054624	ENST00000681433	ENSG00000154743	TSEN2	no	partial	0.318	0	-0.318	2.85001e-05	FALSE
isoComp_00287488	geneComp_00071144	ENST00000659935	ENSG00000235501	CNN3-DT	no	partial	0.367	0.054	-0.313	2.87576e-05	FALSE
isoComp_00224989	geneComp_00053845	ENST00000372418	ENSG00000147224	PRPS1	no	partial	0.208	0.008	-0.199	3.15232e-05	TRUE
isoComp_00241646	geneComp_00056361	ENST00000298715	ENSG00000165816	VWA2	no	partial	0.179	0	-0.179	3.40101e-05	TRUE
isoComp_00243711	geneComp_00056673	ENST00000300589	ENSG00000167207	NOD2	no	partial	0.437	0	-0.437	3.61619e-05	TRUE
isoComp_00268739	geneComp_00061271	ENST00000692313	ENSG00000198185	ZNF334	no	partial	0.245	0.619	0.374	3.83218e-05	TRUE
isoComp_00316351	geneComp_00090325	ENST00000692820	ENSG00000291137	GBAP1	no	partial	0.236	0	-0.236	4.2516e-05	TRUE
isoComp_00170589	geneComp_00046712	ENST00000397981	ENSG00000076984	MAP2K7	no	partial	0.312	0.047	-0.265	4.27918e-05	FALSE
isoComp_00173487	geneComp_00047048	ENST00000535142	ENSG00000086827	ZW10	no	partial	0.179	0.041	-0.139	5.07914e-05	FALSE
isoComp_00234210	geneComp_00055177	ENST00000448492	ENSG00000159873	CCDC117	no	partial	0.204	0.021	-0.183	5.13464e-05	TRUE
isoComp_00213593	geneComp_00052316	ENST00000614059	ENSG00000136643	RPS6KC1	no	partial	0.192	0.011	-0.181	6.30672e-05	NA
isoComp_00237884	geneComp_00055760	ENST00000402259	ENSG00000163517	HDAC11	no	partial	0.281	0	-0.281	7.15675e-05	TRUE
isoComp_00263694	geneComp_00060316	ENST00000397071	ENSG00000187630	DHRS4L2	no	partial	0.751	0.178	-0.573	7.29428e-05	TRUE
isoComp_00191274	geneComp_00049275	ENST00000486845	ENSG00000112511	PHF1	no	partial	0.213	0.054	-0.16	8.30684e-05	TRUE
isoComp_00243041	geneComp_00056570	ENST00000300006	ENSG00000166780	BMERB1	no	partial	0.677	0.532	-0.146	8.57821e-05	TRUE
isoComp_00176503	geneComp_00047385	ENST00000518614	ENSG00000096872	IFT74	no	partial	0.169	0.008	-0.161	9.87558e-05	TRUE
isoComp_00179552	geneComp_00047777	ENST00000344256	ENSG00000101224	CDC25B	no	partial	0.299	0.057	-0.242	9.87558e-05	FALSE
isoComp_00182571	geneComp_00048182	ENST00000520859	ENSG00000104325	DECR1	no	partial	0.289	0.022	-0.267	0.000105462	TRUE
isoComp_00160768	geneComp_00045625	ENST00000435970	ENSG00000009413	REV3L	no	partial	0.278	0.014	-0.264	0.000105911	TRUE
isoComp_00206866	geneComp_00051442	ENST00000434421	ENSG00000131042	LILRB2	no	partial	0.408	0.028	-0.379	0.000108349	TRUE
isoComp_00211139	geneComp_00051996	ENST00000490317	ENSG00000134897	BIVM	no	partial	0.374	0.185	-0.189	0.000108633	TRUE
isoComp_00263582	geneComp_00060291	ENST00000488957	ENSG00000187527	ATP13A5	no	partial	0.133	0.324	0.191	0.000108633	FALSE
isoComp_00283511	geneComp_00068924	ENST00000436880	ENSG00000229989	MIR181A1HG	no	partial	0.344	0.163	-0.18	0.000108633	NA
isoComp_00176350	geneComp_00047362	ENST00000337656	ENSG00000095794	CREM	no	partial	0.202	0.006	-0.197	0.000109615	TRUE
isoComp_00195173	geneComp_00049746	ENST00000680832	ENSG00000116337	AMPD2	no	partial	0.26	0	-0.26	0.00010984	TRUE
isoComp_00272165	geneComp_00062868	ENST00000374866	ENSG00000204262	COL5A2	no	partial	0.806	0.939	0.133	0.000130222	TRUE
isoComp_00256729	geneComp_00058900	ENST00000569086	ENSG00000179588	ZFPM1	no	partial	0.286	0	-0.286	0.000133158	TRUE
isoComp_00197234	geneComp_00050039	ENST00000539225	ENSG00000119139	TJP2	no	partial	0.292	0	-0.292	0.000146406	NA
isoComp_00266098	geneComp_00060835	ENST00000686599	ENSG00000196569	LAMA2	no	partial	0.222	0.011	-0.211	0.00017734	FALSE
isoComp_00272035	geneComp_00062840	ENST00000488276	ENSG00000204161	TMEM273	no	partial	0.293	0.008	-0.285	0.000196254	TRUE
isoComp_00248558	geneComp_00057423	ENST00000518169	ENSG00000170791	CHCHD7	no	partial	0.179	0.005	-0.174	0.000197137	TRUE
isoComp_00248459	geneComp_00057402	ENST00000323735	ENSG00000170632	ARMC10	no	partial	0.173	0.023	-0.151	0.000197687	TRUE
isoComp_00255652	geneComp_00058671	ENST00000496152	ENSG00000178057	NDUFAF3	no	partial	0.496	0.278	-0.217	0.000197687	NA
isoComp_00299588	geneComp_00078235	ENST00000666503	ENSG00000258526	NA	no	partial	0.184	0.031	-0.153	0.000203799	FALSE
isoComp_00243964	geneComp_00056706	ENST00000496630	ENSG00000167393	PPP2R3B	no	partial	0.332	0	-0.332	0.000211479	TRUE
isoComp_00189630	geneComp_00049042	ENST00000539028	ENSG00000110852	CLEC2B	no	partial	0.283	0.008	-0.275	0.000216994	TRUE
isoComp_00201386	geneComp_00050646	ENST00000528387	ENSG00000124444	ZNF576	no	partial	0.356	0	-0.356	0.00022838	TRUE
isoComp_00230042	geneComp_00054559	ENST00000683539	ENSG00000154153	RETREG1	no	partial	0.19	0	-0.19	0.000261821	TRUE
isoComp_00235364	geneComp_00055340	ENST00000488996	ENSG00000160991	ORAI2	no	partial	0.423	0.003	-0.42	0.000285056	TRUE
isoComp_00231797	geneComp_00054830	ENST00000524307	ENSG00000156787	TBC1D31	no	partial	0.149	0.002	-0.147	0.000288106	TRUE
isoComp_00240801	geneComp_00056231	ENST00000638131	ENSG00000165195	PIGA	no	partial	0.275	0	-0.275	0.000308098	FALSE
isoComp_00251266	geneComp_00057872	ENST00000380667	ENSG00000173068	BNC2	no	partial	0.382	0	-0.382	0.000341102	TRUE
isoComp_00173486	geneComp_00047048	ENST00000200135	ENSG00000086827	ZW10	no	partial	0.821	0.959	0.139	0.000371128	FALSE
isoComp_00164762	geneComp_00046075	ENST00000706619	ENSG00000052126	PLEKHA5	no	partial	0.159	0.009	-0.15	0.000394552	TRUE
isoComp_00254594	geneComp_00058491	ENST00000449319	ENSG00000176973	FAM89B	no	partial	0.532	0.283	-0.249	0.000394552	TRUE
isoComp_00237474	geneComp_00055690	ENST00000420321	ENSG00000163249	CCNYL1	no	partial	0.235	0.131	-0.104	0.000414457	TRUE
isoComp_00315492	geneComp_00090126	ENST00000621798	ENSG00000290867	LINC01145	no	partial	0.197	0.038	-0.16	0.000414641	FALSE
isoComp_00302137	geneComp_00079936	ENST00000572898	ENSG00000262246	CORO7	no	partial	0.232	0.007	-0.225	0.000489395	NA
isoComp_00183072	geneComp_00048230	ENST00000511342	ENSG00000104723	TUSC3	no	partial	0.257	0.129	-0.127	0.000536804	TRUE
isoComp_00265840	geneComp_00060805	ENST00000428343	ENSG00000196460	RFX8	no	partial	0.484	0.1	-0.383	0.000631664	TRUE
isoComp_00172212	geneComp_00046894	ENST00000642462	ENSG00000081923	ATP8B1	no	partial	0.442	0	-0.442	0.000645702	TRUE
isoComp_00176890	geneComp_00047439	ENST00000431809	ENSG00000099849	RASSF7	no	partial	0.319	0.023	-0.297	0.000645702	TRUE
isoComp_00194222	geneComp_00049629	ENST00000470268	ENSG00000115524	SF3B1	no	partial	0.152	0.007	-0.145	0.000657181	TRUE
isoComp_00173990	geneComp_00047097	ENST00000649570	ENSG00000088035	ALG6	no	partial	0.192	0	-0.192	0.000674216	TRUE
isoComp_00278448	geneComp_00065936	ENST00000276054	ENSG00000221994	ZNF630	no	partial	0.276	0.908	0.632	0.000685258	TRUE
isoComp_00182400	geneComp_00048166	ENST00000620867	ENSG00000104177	MYEF2	no	partial	0.2	0.004	-0.196	0.000696383	NA
isoComp_00224471	geneComp_00053765	ENST00000491163	ENSG00000146540	C7orf50	no	partial	0.168	0.003	-0.165	0.000763548	TRUE
isoComp_00164495	geneComp_00046048	ENST00000511181	ENSG00000049860	HEXB	no	partial	0.362	0.176	-0.187	0.000764183	TRUE
isoComp_00316631	geneComp_00090368	ENST00000562902	ENSG00000291188	NA	no	partial	0.189	0.078	-0.111	0.000832347	FALSE
isoComp_00163740	geneComp_00045966	ENST00000295802	ENSG00000042445	RETSAT	no	partial	0.951	0.735	-0.215	0.000853258	TRUE
isoComp_00254191	geneComp_00058394	ENST00000398154	ENSG00000176358	TAC4	no	partial	0.495	0	-0.495	0.000870576	TRUE
isoComp_00266394	geneComp_00060875	ENST00000648179	ENSG00000196715	VKORC1L1	no	partial	0.762	0.426	-0.337	0.000872154	TRUE
isoComp_00214102	geneComp_00052400	ENST00000686794	ENSG00000137070	IL11RA	no	partial	0.143	0.037	-0.106	0.000917846	TRUE
isoComp_00181198	geneComp_00048029	ENST00000219302	ENSG00000103024	NME3	no	partial	0.856	0.284	-0.572	0.000927487	TRUE
isoComp_00197453	geneComp_00050065	ENST00000373547	ENSG00000119414	PPP6C	no	partial	0.575	0.772	0.197	0.000960113	TRUE
isoComp_00248931	geneComp_00057493	ENST00000495408	ENSG00000171130	ATP6V0E2	no	partial	0.427	0.006	-0.421	0.000960113	TRUE
isoComp_00204155	geneComp_00051060	ENST00000406735	ENSG00000127989	MTERF1	no	partial	0.26	0.025	-0.235	0.00096996	TRUE
isoComp_00258333	geneComp_00059270	ENST00000460672	ENSG00000182162	P2RY8	no	partial	0.211	0.024	-0.187	0.00100008	TRUE
isoComp_00238141	geneComp_00055802	ENST00000427191	ENSG00000163629	PTPN13	no	partial	0.537	0.256	-0.281	0.00100973	NA
isoComp_00253846	geneComp_00058314	ENST00000545089	ENSG00000175832	ETV4	no	partial	0.46	0.004	-0.457	0.00102009	TRUE
isoComp_00263580	geneComp_00060291	ENST00000342358	ENSG00000187527	ATP13A5	no	partial	0.867	0.662	-0.205	0.00105035	FALSE
isoComp_00230162	geneComp_00054579	ENST00000284440	ENSG00000154277	UCHL1	no	partial	0.886	0.512	-0.374	0.00110416	TRUE
isoComp_00272167	geneComp_00062868	ENST00000618828	ENSG00000204262	COL5A2	no	partial	0.176	0.031	-0.145	0.00110416	TRUE
isoComp_00202656	geneComp_00050866	ENST00000246174	ENSG00000125962	ARMCX5	no	partial	0.319	0.044	-0.275	0.00114235	TRUE
isoComp_00166088	geneComp_00046237	ENST00000393639	ENSG00000063761	ADCK1	no	partial	0.242	0.038	-0.204	0.00114502	TRUE
isoComp_00214440	geneComp_00052443	ENST00000676965	ENSG00000137275	RIPK1	no	partial	0.238	0.035	-0.204	0.00124897	TRUE
isoComp_00170253	geneComp_00046675	ENST00000482456	ENSG00000075826	SEC31B	no	partial	0.267	0.005	-0.262	0.00125895	TRUE
isoComp_00211556	geneComp_00052048	ENST00000257694	ENSG00000135241	PNPLA8	no	partial	0.614	0.291	-0.323	0.0012616	TRUE
isoComp_00241239	geneComp_00056311	ENST00000486542	ENSG00000165626	BEND7	no	partial	0.144	0	-0.144	0.00130985	TRUE
isoComp_00218601	geneComp_00052973	ENST00000568142	ENSG00000140682	TGFB1I1	no	partial	0.246	0.047	-0.199	0.00134706	TRUE
isoComp_00313894	geneComp_00088954	ENST00000686193	ENSG00000288838	NA	no	partial	0.855	0.564	-0.291	0.00135976	FALSE
isoComp_00159788	geneComp_00045505	ENST00000503614	ENSG00000005882	PDK2	no	partial	0.241	0	-0.241	0.00140198	NA
isoComp_00238308	geneComp_00055824	ENST00000462046	ENSG00000163684	RPP14	no	partial	0.337	0.048	-0.289	0.00143218	FALSE
isoComp_00314577	geneComp_00089532	ENST00000686111	ENSG00000289607	NA	no	partial	0.478	0.031	-0.447	0.00149636	TRUE
isoComp_00261561	geneComp_00059900	ENST00000678658	ENSG00000185359	HGS	no	partial	0.331	0.163	-0.168	0.00151583	NA
isoComp_00163608	geneComp_00045950	ENST00000673669	ENSG00000040531	CTNS	no	partial	0.299	0.047	-0.252	0.00151856	TRUE
isoComp_00198756	geneComp_00050263	ENST00000520207	ENSG00000120896	SORBS3	no	partial	0.239	0.093	-0.146	0.00155378	TRUE
isoComp_00167409	geneComp_00046378	ENST00000474933	ENSG00000067445	TRO	no	partial	0.274	0.008	-0.266	0.00157371	TRUE
isoComp_00220587	geneComp_00053193	ENST00000357375	ENSG00000142512	SIGLEC10	no	partial	0.371	0	-0.371	0.00159026	TRUE
isoComp_00287468	geneComp_00071133	ENST00000454429	ENSG00000235481	UBE2R2-AS1	no	partial	0.432	0	-0.432	0.00160952	FALSE
isoComp_00227554	geneComp_00054185	ENST00000280333	ENSG00000150760	DOCK1	no	partial	0.611	0.41	-0.2	0.00161249	FALSE
isoComp_00167404	geneComp_00046378	ENST00000442098	ENSG00000067445	TRO	no	partial	0.225	0.012	-0.213	0.00162913	TRUE
isoComp_00161455	geneComp_00045700	ENST00000423698	ENSG00000012061	ERCC1	no	partial	0.236	0.004	-0.232	0.00164173	TRUE
isoComp_00193558	geneComp_00049555	ENST00000238721	ENSG00000115129	TP53I3	no	partial	0.612	0.39	-0.222	0.00171249	TRUE
isoComp_00268411	geneComp_00061210	ENST00000373043	ENSG00000197982	C1orf122	no	partial	0.594	0.311	-0.284	0.001726	TRUE
isoComp_00278452	geneComp_00065936	ENST00000442455	ENSG00000221994	ZNF630	no	partial	0.725	0.059	-0.665	0.001726	TRUE
isoComp_00191149	geneComp_00049257	ENST00000618129	ENSG00000112320	SOBP	no	partial	0.297	0.184	-0.113	0.00173602	TRUE
isoComp_00266254	geneComp_00060854	ENST00000394170	ENSG00000196652	ZKSCAN5	no	partial	0.514	0.069	-0.444	0.00177213	FALSE
isoComp_00175410	geneComp_00047262	ENST00000572795	ENSG00000091622	PITPNM3	no	partial	0.259	0.102	-0.157	0.00177882	TRUE
isoComp_00235944	geneComp_00055418	ENST00000592756	ENSG00000161914	ZNF653	no	partial	0.159	0.029	-0.13	0.0019338	TRUE
isoComp_00238502	geneComp_00055841	ENST00000490698	ENSG00000163738	MTHFD2L	no	partial	0.305	0.008	-0.297	0.00194232	TRUE
isoComp_00259506	geneComp_00059478	ENST00000512334	ENSG00000183258	DDX41	no	partial	0.288	0	-0.288	0.00195783	TRUE
isoComp_00246979	geneComp_00057136	ENST00000650695	ENSG00000169255	B3GALNT1	no	partial	0.297	0	-0.297	0.00197769	TRUE
isoComp_00315158	geneComp_00089962	ENST00000616141	ENSG00000290569	NA	no	partial	0.373	0.228	-0.145	0.00197769	FALSE
isoComp_00259771	geneComp_00059539	ENST00000402174	ENSG00000183579	ZNRF3	no	partial	0.879	0.054	-0.824	0.0019973	TRUE
isoComp_00305049	geneComp_00081929	ENST00000604231	ENSG00000268750	NA	no	partial	0.271	0.062	-0.209	0.00200634	TRUE
isoComp_00242970	geneComp_00056559	ENST00000561139	ENSG00000166710	B2M	no	partial	0.554	0.386	-0.168	0.0020391	TRUE
isoComp_00204468	geneComp_00051112	ENST00000393329	ENSG00000128513	POT1	no	partial	0.258	0.028	-0.229	0.00208061	TRUE
isoComp_00236935	geneComp_00055586	ENST00000498791	ENSG00000162813	BPNT1	no	partial	0.126	0.008	-0.117	0.00209308	TRUE
isoComp_00256918	geneComp_00058926	ENST00000391768	ENSG00000179820	MYADM	no	partial	0.397	0.276	-0.121	0.00212688	TRUE
isoComp_00268161	geneComp_00061174	ENST00000406434	ENSG00000197872	CYRIA	no	partial	0.229	0.046	-0.183	0.00213869	TRUE
isoComp_00238686	geneComp_00055877	ENST00000490290	ENSG00000163870	TPRA1	no	partial	0.216	0	-0.216	0.00220605	TRUE
isoComp_00176072	geneComp_00047321	ENST00000697893	ENSG00000094631	HDAC6	no	partial	0.16	0.015	-0.145	0.00228232	TRUE
isoComp_00221056	geneComp_00053274	ENST00000367843	ENSG00000143164	DCAF6	no	partial	0.357	0.2	-0.157	0.00228232	NA
isoComp_00254680	geneComp_00058503	ENST00000560168	ENSG00000177045	SIX5	no	partial	0.5	0.112	-0.388	0.00234728	TRUE
isoComp_00252304	geneComp_00058052	ENST00000533024	ENSG00000174151	CYB561D1	no	partial	0.493	0.021	-0.472	0.00236218	TRUE
isoComp_00160317	geneComp_00045575	ENST00000569601	ENSG00000007376	RPUSD1	no	partial	0.116	0.007	-0.109	0.00238581	TRUE
isoComp_00195998	geneComp_00049864	ENST00000437324	ENSG00000117280	RAB29	no	partial	0.17	0	-0.17	0.0024484	TRUE
isoComp_00267551	geneComp_00061071	ENST00000561857	ENSG00000197471	SPN	no	partial	0.203	0.019	-0.183	0.00245942	TRUE
isoComp_00230911	geneComp_00054688	ENST00000691604	ENSG00000155393	HEATR3	no	partial	0.304	0	-0.304	0.00260414	TRUE
isoComp_00178829	geneComp_00047687	ENST00000340738	ENSG00000100767	PAPLN	no	partial	0.219	0.006	-0.213	0.00260726	TRUE
isoComp_00272296	geneComp_00062892	ENST00000477826	ENSG00000204348	DXO	no	partial	0.195	0.059	-0.136	0.00263829	TRUE
isoComp_00225128	geneComp_00053862	ENST00000356537	ENSG00000147419	CCDC25	no	partial	0.61	0.432	-0.178	0.00267066	TRUE
isoComp_00263614	geneComp_00060299	ENST00000540964	ENSG00000187554	TLR5	no	partial	0.292	0.174	-0.118	0.00269573	TRUE
isoComp_00199137	geneComp_00050315	ENST00000407202	ENSG00000121417	ZNF211	no	partial	0.409	0.02	-0.389	0.00281146	TRUE
isoComp_00223831	geneComp_00053657	ENST00000507921	ENSG00000145725	PPIP5K2	no	partial	0.304	0.079	-0.226	0.00281866	TRUE
isoComp_00291468	geneComp_00073463	ENST00000649419	ENSG00000242802	AP5Z1	no	partial	0.171	0.015	-0.156	0.00281866	TRUE
isoComp_00248490	geneComp_00057405	ENST00000395829	ENSG00000170638	TRABD	no	partial	0.376	0.051	-0.326	0.00298502	TRUE
isoComp_00301545	geneComp_00079555	ENST00000566506	ENSG00000261170	NA	no	partial	0.34	0.034	-0.306	0.00298502	FALSE
isoComp_00207610	geneComp_00051536	ENST00000582747	ENSG00000131746	TNS4	no	partial	0.209	0.096	-0.113	0.0030118	TRUE
isoComp_00183729	geneComp_00048308	ENST00000534378	ENSG00000105135	ILVBL	no	partial	0.279	0.016	-0.263	0.00302828	FALSE
isoComp_00315854	geneComp_00090256	ENST00000685456	ENSG00000291064	RPL23AP7	no	partial	0.277	0	-0.277	0.0030494	TRUE
isoComp_00210002	geneComp_00051847	ENST00000520110	ENSG00000134014	ELP3	no	partial	0.158	0.042	-0.116	0.00305321	FALSE
isoComp_00213827	geneComp_00052353	ENST00000373299	ENSG00000136854	STXBP1	no	partial	0.67	0.416	-0.255	0.00305321	TRUE
isoComp_00195236	geneComp_00049753	ENST00000369709	ENSG00000116473	RAP1A	no	partial	0.945	0.689	-0.256	0.00306791	TRUE
isoComp_00202739	geneComp_00050879	ENST00000706830	ENSG00000126001	CEP250	no	partial	0.166	0.026	-0.14	0.00307667	TRUE
isoComp_00268896	geneComp_00061295	ENST00000698652	ENSG00000198286	CARD11	no	partial	0.163	0.013	-0.151	0.00307898	FALSE
isoComp_00259315	geneComp_00059431	ENST00000705282	ENSG00000183023	SLC8A1	no	partial	0.363	0	-0.363	0.00310098	FALSE
isoComp_00235766	geneComp_00055383	ENST00000639636	ENSG00000161551	ZNF577	no	partial	0.021	0.154	0.133	0.00310339	FALSE
isoComp_00184787	geneComp_00048445	ENST00000599885	ENSG00000105750	ZNF85	no	partial	0.233	0	-0.233	0.00311275	TRUE
isoComp_00169472	geneComp_00046595	ENST00000382199	ENSG00000073792	IGF2BP2	no	partial	0.726	0.44	-0.286	0.0031866	TRUE
isoComp_00225177	geneComp_00053868	ENST00000521637	ENSG00000147454	SLC25A37	no	partial	0.107	0.003	-0.103	0.00329872	TRUE
isoComp_00243605	geneComp_00056652	ENST00000513544	ENSG00000167107	ACSF2	no	partial	0.272	0.092	-0.18	0.003309	NA
isoComp_00239187	geneComp_00055944	ENST00000487805	ENSG00000164068	RNF123	no	partial	0.804	0.442	-0.362	0.00331681	TRUE
isoComp_00212366	geneComp_00052149	ENST00000569068	ENSG00000135736	CCDC102A	no	partial	0.241	0.09	-0.151	0.00339447	TRUE
isoComp_00180934	geneComp_00047997	ENST00000520833	ENSG00000102878	HSF4	no	partial	0.164	0.02	-0.144	0.00351491	TRUE
isoComp_00181091	geneComp_00048014	ENST00000613167	ENSG00000102934	PLLP	no	partial	0.789	0.561	-0.228	0.00357657	TRUE
isoComp_00280661	geneComp_00067283	ENST00000420844	ENSG00000225885	NA	no	partial	0.18	0	-0.18	0.00368153	TRUE
isoComp_00221852	geneComp_00053379	ENST00000648267	ENSG00000143612	C1orf43	no	partial	0.178	0.004	-0.174	0.0037059	TRUE
isoComp_00316632	geneComp_00090368	ENST00000702506	ENSG00000291188	NA	no	partial	0.811	0.922	0.111	0.00375237	FALSE
isoComp_00252083	geneComp_00058011	ENST00000514112	ENSG00000173868	PHOSPHO1	no	partial	0.43	0	-0.43	0.0037811	TRUE
isoComp_00264773	geneComp_00060597	ENST00000340067	ENSG00000188997	KCTD21	no	partial	0.982	0.759	-0.224	0.00379151	TRUE
isoComp_00232890	geneComp_00054976	ENST00000478862	ENSG00000158092	NCK1	no	partial	0.195	0.066	-0.129	0.00380573	FALSE
isoComp_00169876	geneComp_00046642	ENST00000251074	ENSG00000075188	NUP37	no	partial	0.414	0.181	-0.233	0.00398383	TRUE
isoComp_00184367	geneComp_00048384	ENST00000594790	ENSG00000105499	PLA2G4C	no	partial	0.454	0.013	-0.442	0.0040767	FALSE
isoComp_00260469	geneComp_00059689	ENST00000491556	ENSG00000184307	ZDHHC23	no	partial	0.232	0.107	-0.125	0.00409448	TRUE
isoComp_00233133	geneComp_00055017	ENST00000474594	ENSG00000158467	AHCYL2	no	partial	0.312	0.046	-0.266	0.00417796	TRUE
isoComp_00196273	geneComp_00049902	ENST00000474047	ENSG00000117533	VAMP4	no	partial	0.176	0	-0.176	0.00429415	TRUE
isoComp_00169581	geneComp_00046605	ENST00000177742	ENSG00000074071	MRPS34	no	partial	0.45	0.181	-0.269	0.00439559	TRUE
isoComp_00249487	geneComp_00057605	ENST00000328089	ENSG00000171621	SPSB1	no	partial	0.405	0.613	0.208	0.00443918	FALSE
isoComp_00267514	geneComp_00061065	ENST00000355836	ENSG00000197451	HNRNPAB	no	partial	0.372	0.16	-0.211	0.0044603	TRUE
isoComp_00191595	geneComp_00049313	ENST00000371383	ENSG00000112796	ENPP5	no	partial	0.799	0.645	-0.154	0.0044826	TRUE
isoComp_00170280	geneComp_00046677	ENST00000549060	ENSG00000075884	ARHGAP15	no	partial	0.16	0.041	-0.118	0.00449944	TRUE
isoComp_00215316	geneComp_00052549	ENST00000432245	ENSG00000137868	STRA6	no	partial	0.09	0.28	0.19	0.00451915	TRUE
isoComp_00258332	geneComp_00059270	ENST00000381297	ENSG00000182162	P2RY8	no	partial	0.789	0.976	0.187	0.00451915	TRUE
isoComp_00298684	geneComp_00077668	ENST00000535817	ENSG00000256690	STX5-DT	no	partial	0.5	0.115	-0.385	0.00452302	FALSE
isoComp_00315330	geneComp_00090052	ENST00000380331	ENSG00000290746	CA5BP1	no	partial	0.043	0.221	0.178	0.00454873	FALSE
isoComp_00252520	geneComp_00058088	ENST00000611835	ENSG00000174428	GTF2IRD2B	no	partial	0.207	0.102	-0.105	0.0045518	TRUE
isoComp_00207660	geneComp_00051541	ENST00000521461	ENSG00000131773	KHDRBS3	no	partial	0.155	0.025	-0.13	0.00461855	TRUE
isoComp_00174913	geneComp_00047212	ENST00000265028	ENSG00000090520	DNAJB11	no	partial	0.859	0.623	-0.236	0.00461902	TRUE
isoComp_00265841	geneComp_00060805	ENST00000481179	ENSG00000196460	RFX8	no	partial	0.326	0.012	-0.314	0.00462176	TRUE
isoComp_00192273	geneComp_00049407	ENST00000393895	ENSG00000113645	WWC1	no	partial	0.29	0.078	-0.212	0.00462389	FALSE
isoComp_00179177	geneComp_00047719	ENST00000555802	ENSG00000100968	NFATC4	no	partial	0.205	0.012	-0.194	0.00471995	TRUE
isoComp_00192593	geneComp_00049444	ENST00000478469	ENSG00000114054	PCCB	no	partial	0.129	0.014	-0.114	0.00488095	TRUE
isoComp_00176204	geneComp_00047340	ENST00000223423	ENSG00000095303	PTGS1	no	partial	0.152	0.016	-0.136	0.00490523	TRUE
isoComp_00187764	geneComp_00048821	ENST00000592454	ENSG00000108784	NAGLU	no	partial	0.224	0	-0.224	0.00501912	TRUE
isoComp_00241948	geneComp_00056418	ENST00000299157	ENSG00000166130	IKBIP	no	partial	0.446	0.692	0.246	0.00509324	FALSE
isoComp_00209679	geneComp_00051816	ENST00000360375	ENSG00000133739	LRRCC1	no	partial	0.503	0.234	-0.269	0.00509907	TRUE
isoComp_00178130	geneComp_00047602	ENST00000698891	ENSG00000100385	IL2RB	no	partial	0.473	0	-0.473	0.00530255	TRUE
isoComp_00177000	geneComp_00047451	ENST00000490458	ENSG00000099940	SNAP29	no	partial	0.095	0.198	0.103	0.00533162	TRUE
isoComp_00266685	geneComp_00060924	ENST00000369850	ENSG00000196924	FLNA	no	partial	0.755	0.483	-0.272	0.0053668	TRUE
isoComp_00178655	geneComp_00047669	ENST00000556981	ENSG00000100629	CEP128	no	partial	0.107	0.003	-0.103	0.00542787	TRUE
isoComp_00234031	geneComp_00055154	ENST00000582678	ENSG00000159640	ACE	no	partial	0.189	0.086	-0.103	0.00542787	TRUE
isoComp_00292628	geneComp_00074070	ENST00000666750	ENSG00000245648	KLRK1-AS1	no	partial	0.271	0.07	-0.201	0.00542787	TRUE
isoComp_00249875	geneComp_00057665	ENST00000474847	ENSG00000171914	TLN2	no	partial	0.149	0.014	-0.135	0.00543241	TRUE
isoComp_00184597	geneComp_00048422	ENST00000247003	ENSG00000105671	DDX49	no	partial	0.709	0.386	-0.323	0.00543614	TRUE
isoComp_00204889	geneComp_00051175	ENST00000354678	ENSG00000129007	CALML4	no	partial	0.6	0.486	-0.114	0.00544236	TRUE
isoComp_00234581	geneComp_00055231	ENST00000479117	ENSG00000160216	AGPAT3	no	partial	0.26	0.079	-0.181	0.00547471	TRUE
isoComp_00283568	geneComp_00068969	ENST00000445452	ENSG00000230084	ZBTB47-AS1	no	partial	0.232	0.007	-0.225	0.00558537	FALSE
isoComp_00313895	geneComp_00088954	ENST00000690996	ENSG00000288838	NA	no	partial	0.145	0.436	0.291	0.00575258	FALSE
isoComp_00185607	geneComp_00048548	ENST00000468872	ENSG00000106355	LSM5	no	partial	0.221	0.075	-0.146	0.00575551	TRUE
isoComp_00205385	geneComp_00051238	ENST00000262715	ENSG00000129566	TEP1	no	partial	0.287	0.604	0.317	0.00585171	TRUE
isoComp_00256575	geneComp_00058866	ENST00000399082	ENSG00000179344	HLA-DQB1	no	partial	0.137	0.015	-0.123	0.00592391	NA
isoComp_00176069	geneComp_00047321	ENST00000697552	ENSG00000094631	HDAC6	no	partial	0.151	0.002	-0.149	0.00596872	TRUE
isoComp_00228264	geneComp_00054277	ENST00000358102	ENSG00000151623	NR3C2	no	partial	0.011	0.122	0.111	0.00598857	TRUE
isoComp_00167984	geneComp_00046440	ENST00000483115	ENSG00000069509	FUNDC1	no	partial	0.807	0.3	-0.507	0.00599769	TRUE
isoComp_00247835	geneComp_00057276	ENST00000540486	ENSG00000170043	TRAPPC1	no	partial	0.201	0.372	0.171	0.0061065	TRUE
isoComp_00212394	geneComp_00052154	ENST00000446915	ENSG00000135750	KCNK1	no	partial	0.148	0.03	-0.119	0.00640876	TRUE
isoComp_00215543	geneComp_00052582	ENST00000462426	ENSG00000138036	DYNC2LI1	no	partial	0.229	0.005	-0.224	0.00640876	TRUE
isoComp_00277143	geneComp_00065249	ENST00000504270	ENSG00000215039	CD27-AS1	no	partial	0.238	0.01	-0.228	0.00667955	FALSE
isoComp_00228487	geneComp_00054312	ENST00000512085	ENSG00000151881	TMEM267	no	partial	0.283	0.094	-0.189	0.00669436	FALSE
isoComp_00191146	geneComp_00049257	ENST00000317357	ENSG00000112320	SOBP	no	partial	0.703	0.816	0.113	0.00677142	TRUE
isoComp_00282766	geneComp_00068447	ENST00000600739	ENSG00000228748	NA	no	partial	0.012	0.144	0.132	0.00677142	FALSE
isoComp_00228267	geneComp_00054277	ENST00000511528	ENSG00000151623	NR3C2	no	partial	0.345	0.009	-0.336	0.00691373	TRUE
isoComp_00303397	geneComp_00080898	ENST00000582631	ENSG00000265845	NA	no	partial	0.88	0.463	-0.417	0.0069589	FALSE
isoComp_00256920	geneComp_00058926	ENST00000391770	ENSG00000179820	MYADM	no	partial	0.398	0.546	0.147	0.00705971	TRUE
isoComp_00277585	geneComp_00065375	ENST00000462952	ENSG00000215845	TSTD1	no	partial	0.393	0.185	-0.208	0.00705971	TRUE
isoComp_00174916	geneComp_00047212	ENST00000495390	ENSG00000090520	DNAJB11	no	partial	0.083	0.187	0.104	0.00723846	TRUE
isoComp_00236481	geneComp_00055506	ENST00000621990	ENSG00000162493	PDPN	no	partial	0.139	0.259	0.12	0.00726882	TRUE
isoComp_00196168	geneComp_00049885	ENST00000372070	ENSG00000117448	AKR1A1	no	partial	0.315	0.181	-0.133	0.00729817	FALSE
isoComp_00164073	geneComp_00046005	ENST00000545746	ENSG00000047621	C12orf4	no	partial	0.146	0.002	-0.143	0.00731502	TRUE
isoComp_00250895	geneComp_00057830	ENST00000303334	ENSG00000172828	CES3	no	partial	0.937	0.249	-0.688	0.00744857	TRUE
isoComp_00273726	geneComp_00063197	ENST00000590818	ENSG00000205744	DENND1C	no	partial	0.434	0.028	-0.406	0.00749916	TRUE
isoComp_00234070	geneComp_00055158	ENST00000515867	ENSG00000159685	CHCHD6	no	partial	0.297	0.027	-0.27	0.00755291	TRUE
isoComp_00223526	geneComp_00053611	ENST00000498875	ENSG00000145332	KLHL8	no	partial	0.242	0.018	-0.225	0.00776683	FALSE
isoComp_00265710	geneComp_00060778	ENST00000527740	ENSG00000196378	ZNF34	no	partial	0.275	0	-0.275	0.00795461	TRUE
isoComp_00300151	geneComp_00078616	ENST00000558831	ENSG00000259248	USP3-AS1	no	partial	0.345	0.038	-0.307	0.00824706	FALSE
isoComp_00269080	geneComp_00061327	ENST00000427117	ENSG00000198453	ZNF568	no	partial	0.2	0.305	0.105	0.00828601	TRUE
isoComp_00299824	geneComp_00078396	ENST00000555147	ENSG00000258839	MC1R	no	partial	0.075	0.488	0.413	0.00828601	TRUE
isoComp_00215324	geneComp_00052549	ENST00000575272	ENSG00000137868	STRA6	no	partial	0.242	0.361	0.119	0.00832919	TRUE
isoComp_00199845	geneComp_00050411	ENST00000643595	ENSG00000122512	PMS2	no	partial	0.482	0	-0.482	0.00867447	TRUE
isoComp_00260027	geneComp_00059599	ENST00000392568	ENSG00000183828	NUDT14	no	partial	0.009	0.367	0.358	0.0087957	FALSE
isoComp_00242973	geneComp_00056559	ENST00000648006	ENSG00000166710	B2M	no	partial	0.347	0.565	0.218	0.00888272	TRUE
isoComp_00197806	geneComp_00050116	ENST00000324593	ENSG00000119725	ZNF410	no	partial	0.392	0.091	-0.301	0.00908268	TRUE
isoComp_00176889	geneComp_00047439	ENST00000414138	ENSG00000099849	RASSF7	no	partial	0.352	0.016	-0.336	0.00912942	TRUE
isoComp_00234770	geneComp_00055255	ENST00000542192	ENSG00000160325	CACFD1	no	partial	0.285	0	-0.285	0.00919683	TRUE
isoComp_00190133	geneComp_00049101	ENST00000680898	ENSG00000111335	OAS2	no	partial	0.094	0.263	0.169	0.00951476	TRUE
isoComp_00202791	geneComp_00050888	ENST00000246337	ENSG00000126088	UROD	no	partial	0.635	0.221	-0.414	0.00966025	TRUE
isoComp_00206863	geneComp_00051442	ENST00000391746	ENSG00000131042	LILRB2	no	partial	0.165	0	-0.165	0.00966025	TRUE
isoComp_00251697	geneComp_00057948	ENST00000580170	ENSG00000173482	PTPRM	no	partial	0.27	0	-0.27	0.00971297	TRUE
isoComp_00257874	geneComp_00059179	ENST00000449609	ENSG00000181458	TMEM45A	no	partial	0.209	0.092	-0.117	0.0097617	TRUE
isoComp_00259670	geneComp_00059520	ENST00000329797	ENSG00000183484	GPR132	no	partial	0.758	0.371	-0.387	0.0098266	FALSE
isoComp_00202981	geneComp_00050906	ENST00000246548	ENSG00000126261	UBA2	no	partial	0.862	0.547	-0.315	0.00993771	TRUE
isoComp_00183600	geneComp_00048289	ENST00000396331	ENSG00000104972	LILRB1	no	partial	0.657	0.356	-0.301	0.00999339	TRUE
isoComp_00214961	geneComp_00052507	ENST00000330775	ENSG00000137700	SLC37A4	no	partial	0.278	0.01	-0.268	0.0100221	TRUE
isoComp_00207491	geneComp_00051517	ENST00000478065	ENSG00000131584	ACAP3	no	partial	0.412	0.165	-0.247	0.0102906	TRUE
isoComp_00239137	geneComp_00055938	ENST00000635464	ENSG00000164053	ATRIP	no	partial	0.528	0.013	-0.516	0.0102906	TRUE
isoComp_00214072	geneComp_00052394	ENST00000259526	ENSG00000136999	CCN3	no	partial	0.5	0.998	0.498	0.0103066	TRUE
isoComp_00162835	geneComp_00045860	ENST00000539558	ENSG00000029153	BMAL2	no	partial	0.233	0.065	-0.168	0.0104739	TRUE
isoComp_00175610	geneComp_00047283	ENST00000552488	ENSG00000092140	G2E3	no	partial	0.3	0.405	0.106	0.0107081	TRUE
isoComp_00255026	geneComp_00058564	ENST00000549253	ENSG00000177426	TGIF1	no	partial	0.184	0.011	-0.173	0.0107484	TRUE
isoComp_00213715	geneComp_00052333	ENST00000376016	ENSG00000136758	YME1L1	no	partial	0.527	0.419	-0.108	0.0110302	FALSE
isoComp_00241791	geneComp_00056388	ENST00000555341	ENSG00000165948	IFI27L1	no	partial	0.385	0.204	-0.181	0.0112391	FALSE
isoComp_00257891	geneComp_00059183	ENST00000586346	ENSG00000181513	ACBD4	no	partial	0.242	0.042	-0.201	0.0112909	TRUE
isoComp_00172780	geneComp_00046957	ENST00000614549	ENSG00000084070	SMAP2	no	partial	0.248	0.068	-0.18	0.0113426	NA
isoComp_00255190	geneComp_00058588	ENST00000613385	ENSG00000177576	C18orf32	no	partial	0.398	0.271	-0.126	0.0113426	FALSE
isoComp_00182799	geneComp_00048203	ENST00000519833	ENSG00000104432	IL7	no	partial	0.464	0.061	-0.404	0.0113759	TRUE
isoComp_00165554	geneComp_00046171	ENST00000511095	ENSG00000059145	UNKL	no	partial	0.067	0.201	0.134	0.0114202	TRUE
isoComp_00243388	geneComp_00056625	ENST00000555155	ENSG00000166965	RCCD1	no	partial	0.487	0.04	-0.447	0.0116595	TRUE
isoComp_00160074	geneComp_00045544	ENST00000429152	ENSG00000006695	COX10	no	partial	0.314	0.151	-0.163	0.0117755	TRUE
isoComp_00164290	geneComp_00046031	ENST00000675042	ENSG00000049167	ERCC8	no	partial	0.253	0	-0.253	0.0118736	TRUE
isoComp_00255553	geneComp_00058658	ENST00000463472	ENSG00000177989	CIMAP1B	no	partial	0.476	0.225	-0.251	0.0120113	TRUE
isoComp_00247621	geneComp_00057229	ENST00000449107	ENSG00000169814	BTD	no	partial	0.119	0.015	-0.104	0.0123498	FALSE
isoComp_00207665	geneComp_00051541	ENST00000704572	ENSG00000131773	KHDRBS3	no	partial	0.516	0.672	0.156	0.0123785	TRUE
isoComp_00177955	geneComp_00047581	ENST00000449084	ENSG00000100336	APOL4	no	partial	0.151	0.005	-0.146	0.0123873	TRUE
isoComp_00233392	geneComp_00055066	ENST00000381470	ENSG00000158856	DMTN	no	partial	0.191	0.048	-0.142	0.0124352	FALSE
isoComp_00235331	geneComp_00055334	ENST00000688394	ENSG00000160957	RECQL4	no	partial	0.009	0.149	0.141	0.0125333	TRUE
isoComp_00267275	geneComp_00061018	ENST00000470232	ENSG00000197283	SYNGAP1	no	partial	0.327	0.177	-0.15	0.0125333	TRUE
isoComp_00197163	geneComp_00050024	ENST00000626491	ENSG00000118961	LDAH	no	partial	0.415	0.003	-0.412	0.012547	FALSE
isoComp_00184539	geneComp_00048410	ENST00000600238	ENSG00000105640	RPL18A	no	partial	0.286	0.119	-0.167	0.0126426	TRUE
isoComp_00168215	geneComp_00046469	ENST00000621441	ENSG00000070367	EXOC5	no	partial	0.881	0.632	-0.249	0.0126429	TRUE
isoComp_00203236	geneComp_00050941	ENST00000485641	ENSG00000126756	UXT	no	partial	0.127	0.01	-0.118	0.0128851	TRUE
isoComp_00279365	geneComp_00066534	ENST00000656463	ENSG00000224078	SNHG14	no	partial	0.008	0.117	0.109	0.0129731	FALSE
isoComp_00234810	geneComp_00055264	ENST00000373281	ENSG00000160404	TOR2A	no	partial	0.5	0.067	-0.433	0.0129904	TRUE
isoComp_00253187	geneComp_00058202	ENST00000672916	ENSG00000175155	YPEL2	no	partial	0	0.145	0.145	0.0130138	TRUE
isoComp_00283394	geneComp_00068850	ENST00000566632	ENSG00000229809	ZNF688	no	partial	0.245	0.008	-0.237	0.0135217	TRUE
isoComp_00295103	geneComp_00075278	ENST00000558687	ENSG00000250988	SNHG21	no	partial	0.497	0	-0.497	0.0136227	FALSE
isoComp_00237076	geneComp_00055614	ENST00000430495	ENSG00000162927	PUS10	no	partial	0.166	0	-0.166	0.01363	TRUE
isoComp_00261392	geneComp_00059871	ENST00000525188	ENSG00000185238	PRMT3	no	partial	0.146	0.014	-0.131	0.01363	TRUE
isoComp_00212365	geneComp_00052149	ENST00000258214	ENSG00000135736	CCDC102A	no	partial	0.759	0.91	0.151	0.0136394	TRUE
isoComp_00247190	geneComp_00057171	ENST00000522434	ENSG00000169490	TM2D2	no	partial	0.144	0.004	-0.14	0.013718	TRUE
isoComp_00248450	geneComp_00057401	ENST00000394909	ENSG00000170631	ZNF16	no	partial	0.512	0.088	-0.424	0.0138383	TRUE
isoComp_00179032	geneComp_00047708	ENST00000261479	ENSG00000100902	PSMA6	no	partial	0.745	0.389	-0.355	0.0140979	TRUE
isoComp_00285072	geneComp_00069790	ENST00000615718	ENSG00000232118	BACH1-AS1	no	partial	0.927	0.488	-0.439	0.0142757	FALSE
isoComp_00207883	geneComp_00051571	ENST00000587296	ENSG00000132004	FBXW9	no	partial	0.505	0.065	-0.44	0.0143246	TRUE
isoComp_00263422	geneComp_00060257	ENST00000600094	ENSG00000187187	ZNF546	no	partial	0.31	0.006	-0.304	0.0144368	TRUE
isoComp_00164687	geneComp_00046070	ENST00000674063	ENSG00000051382	PIK3CB	no	partial	0.839	0.383	-0.456	0.01456	FALSE
isoComp_00205899	geneComp_00051318	ENST00000598811	ENSG00000130313	PGLS	no	partial	0.503	0.31	-0.193	0.0146905	TRUE
isoComp_00222739	geneComp_00053501	ENST00000440779	ENSG00000144451	SPAG16	no	partial	0.395	0.056	-0.339	0.0147623	TRUE
isoComp_00237221	geneComp_00055642	ENST00000406397	ENSG00000163032	VSNL1	no	partial	0.224	0.389	0.164	0.0147623	TRUE
isoComp_00286634	geneComp_00070715	ENST00000355095	ENSG00000234444	ZNF736	no	partial	0.419	0.044	-0.375	0.0147623	TRUE
isoComp_00228856	geneComp_00054382	ENST00000378202	ENSG00000152464	RPP38	no	partial	0.41	0.149	-0.261	0.0148237	TRUE
isoComp_00266395	geneComp_00060875	ENST00000648187	ENSG00000196715	VKORC1L1	no	partial	0.137	0.276	0.139	0.0148237	TRUE
isoComp_00232628	geneComp_00054935	ENST00000504570	ENSG00000157765	SLC34A2	no	partial	0.498	0.395	-0.103	0.0148259	FALSE
isoComp_00298707	geneComp_00077688	ENST00000542401	ENSG00000256751	PLBD1-AS1	no	partial	0.945	0.571	-0.374	0.015075	FALSE
isoComp_00304893	geneComp_00081843	ENST00000622447	ENSG00000268350	FAM156A	no	partial	0.786	0.557	-0.228	0.015288	TRUE
isoComp_00226494	geneComp_00054044	ENST00000528173	ENSG00000149091	DGKZ	no	partial	0.5	0.232	-0.268	0.0153958	NA
isoComp_00298392	geneComp_00077496	ENST00000473127	ENSG00000256053	COA8	no	partial	0.247	0.007	-0.24	0.015421	TRUE
isoComp_00187289	geneComp_00048768	ENST00000540627	ENSG00000108424	KPNB1	no	partial	0.159	0.047	-0.112	0.0155606	TRUE
isoComp_00294779	geneComp_00075088	ENST00000484558	ENSG00000250479	CHCHD10	no	partial	0.169	0.669	0.501	0.0157719	TRUE
isoComp_00310944	geneComp_00086612	ENST00000635060	ENSG00000282851	BISPR	no	partial	0.32	0.09	-0.23	0.0161903	TRUE
isoComp_00204131	geneComp_00051055	ENST00000460184	ENSG00000127952	STYXL1	no	partial	0.197	0.068	-0.129	0.0163069	FALSE
isoComp_00268516	geneComp_00061226	ENST00000518389	ENSG00000198042	MAK16	no	partial	0.328	0.015	-0.313	0.0164341	TRUE
isoComp_00196272	geneComp_00049902	ENST00000236192	ENSG00000117533	VAMP4	no	partial	0.824	1	0.176	0.0164538	TRUE
isoComp_00235007	geneComp_00055294	ENST00000525863	ENSG00000160703	NLRX1	no	partial	0.37	0.046	-0.325	0.0164538	TRUE
isoComp_00176553	geneComp_00047396	ENST00000707119	ENSG00000099204	ABLIM1	no	partial	0.769	0.088	-0.681	0.0164816	TRUE
isoComp_00171518	geneComp_00046811	ENST00000549595	ENSG00000079387	SENP1	no	partial	0.287	0	-0.287	0.016676	FALSE
isoComp_00168868	geneComp_00046541	ENST00000396688	ENSG00000072195	SPEG	no	partial	0.183	0.031	-0.153	0.0167337	TRUE
isoComp_00280540	geneComp_00067225	ENST00000414488	ENSG00000225746	MEG8	no	partial	0.188	0.03	-0.158	0.01679	FALSE
isoComp_00254493	geneComp_00058467	ENST00000571814	ENSG00000176845	METRNL	no	partial	0.5	0.31	-0.19	0.0170806	TRUE
isoComp_00290821	geneComp_00073120	ENST00000487814	ENSG00000241560	ZBTB20-AS1	no	partial	0.136	0.015	-0.121	0.0171265	FALSE
isoComp_00257326	geneComp_00059037	ENST00000642959	ENSG00000180488	MIGA1	no	partial	0.334	0.014	-0.321	0.0173618	TRUE
isoComp_00298685	geneComp_00077668	ENST00000535867	ENSG00000256690	STX5-DT	no	partial	0.5	0.885	0.385	0.0173774	FALSE
isoComp_00190124	geneComp_00049101	ENST00000392583	ENSG00000111335	OAS2	no	partial	0.718	0.267	-0.45	0.0174986	TRUE
isoComp_00242029	geneComp_00056432	ENST00000408038	ENSG00000166167	BTRC	no	partial	0.629	0.323	-0.307	0.0177795	FALSE
isoComp_00219327	geneComp_00053045	ENST00000407215	ENSG00000141295	SCRN2	no	partial	0.704	0.455	-0.25	0.0178372	TRUE
isoComp_00239543	geneComp_00056004	ENST00000502322	ENSG00000164211	STARD4	no	partial	0	0.161	0.161	0.0178372	TRUE
isoComp_00247983	geneComp_00057309	ENST00000527733	ENSG00000170242	USP47	no	partial	0.645	0.314	-0.33	0.0178372	FALSE
isoComp_00217395	geneComp_00052828	ENST00000603680	ENSG00000139629	GALNT6	no	partial	0	0.148	0.148	0.0180424	FALSE
isoComp_00317352	geneComp_00090716	ENST00000462560	ENSG00000293427	NA	no	partial	0.669	0.186	-0.484	0.0182063	FALSE
isoComp_00257036	geneComp_00058955	ENST00000389623	ENSG00000179954	SSC5D	no	partial	0.998	0.814	-0.184	0.0183806	TRUE
isoComp_00165310	geneComp_00046144	ENST00000367619	ENSG00000057252	SOAT1	no	partial	0.896	0.656	-0.24	0.0188737	TRUE
isoComp_00315333	geneComp_00090052	ENST00000380336	ENSG00000290746	CA5BP1	no	partial	0.479	0.217	-0.262	0.0190325	FALSE
isoComp_00197903	geneComp_00050126	ENST00000402003	ENSG00000119801	YPEL5	no	partial	0.311	0.003	-0.308	0.0191441	FALSE
isoComp_00247834	geneComp_00057276	ENST00000303731	ENSG00000170043	TRAPPC1	no	partial	0.657	0.547	-0.11	0.0191441	TRUE
isoComp_00198457	geneComp_00050223	ENST00000495422	ENSG00000120656	TAF12	no	partial	0.188	0.012	-0.176	0.0193994	FALSE
isoComp_00236044	geneComp_00055432	ENST00000547543	ENSG00000161996	WDR90	no	partial	0.287	0.066	-0.221	0.0194053	TRUE
isoComp_00196292	geneComp_00049905	ENST00000706595	ENSG00000117569	PTBP2	no	partial	0.815	0.535	-0.28	0.0195321	FALSE
isoComp_00198876	geneComp_00050276	ENST00000262207	ENSG00000121005	CRISPLD1	no	partial	0.44	0.938	0.498	0.019549	TRUE
isoComp_00175514	geneComp_00047276	ENST00000490506	ENSG00000092036	HAUS4	no	partial	0.138	0.019	-0.119	0.0196197	FALSE
isoComp_00246376	geneComp_00057041	ENST00000541144	ENSG00000168876	ANKRD49	no	partial	0.195	0	-0.195	0.0196442	TRUE
isoComp_00240653	geneComp_00056197	ENST00000356838	ENSG00000165071	TMEM71	no	partial	0.244	0	-0.244	0.0199416	FALSE
isoComp_00221411	geneComp_00053326	ENST00000483335	ENSG00000143382	ADAMTSL4	no	partial	0.55	0.401	-0.149	0.0202706	TRUE
isoComp_00200538	geneComp_00050505	ENST00000394824	ENSG00000123358	NR4A1	no	partial	0.584	0	-0.583	0.0203187	TRUE
isoComp_00249489	geneComp_00057605	ENST00000377399	ENSG00000171621	SPSB1	no	partial	0.566	0.268	-0.298	0.020483	FALSE
isoComp_00227559	geneComp_00054185	ENST00000623213	ENSG00000150760	DOCK1	no	partial	0.283	0.385	0.102	0.0204924	FALSE
isoComp_00203790	geneComp_00051017	ENST00000594975	ENSG00000127527	EPS15L1	no	partial	0.228	0.007	-0.221	0.0205154	NA
isoComp_00297803	geneComp_00077158	ENST00000481972	ENSG00000255154	HTD2	no	partial	0.694	0.426	-0.268	0.0207128	TRUE
isoComp_00245848	geneComp_00056961	ENST00000568085	ENSG00000168447	SCNN1B	no	partial	0.319	0.105	-0.214	0.0207823	TRUE
isoComp_00219929	geneComp_00053103	ENST00000269392	ENSG00000141577	CEP131	no	partial	0.875	0.354	-0.521	0.0207858	TRUE
isoComp_00232454	geneComp_00054915	ENST00000398911	ENSG00000157554	ERG	no	partial	0.525	0.038	-0.487	0.0208826	TRUE
isoComp_00260030	geneComp_00059599	ENST00000550912	ENSG00000183828	NUDT14	no	partial	0.632	0.333	-0.299	0.0208826	FALSE
isoComp_00268061	geneComp_00061158	ENST00000602554	ENSG00000197813	NA	no	partial	0.255	0.027	-0.228	0.0208826	FALSE
isoComp_00183417	geneComp_00048267	ENST00000588450	ENSG00000104886	PLEKHJ1	no	partial	0.626	0.348	-0.277	0.0209859	TRUE
isoComp_00238382	geneComp_00055831	ENST00000478206	ENSG00000163702	IL17RC	no	partial	0.16	0.032	-0.128	0.0210121	TRUE
isoComp_00254580	geneComp_00058487	ENST00000498018	ENSG00000176945	MUC20	no	partial	0.341	0.135	-0.206	0.0211713	TRUE
isoComp_00293079	geneComp_00074185	ENST00000676800	ENSG00000247596	TWF2	no	partial	0.243	0.098	-0.146	0.021179	TRUE
isoComp_00176188	geneComp_00047336	ENST00000264028	ENSG00000095139	ARCN1	no	partial	0.735	0.933	0.198	0.021314	FALSE
isoComp_00205233	geneComp_00051215	ENST00000693296	ENSG00000129422	MTUS1	no	partial	0.66	0.308	-0.351	0.0213689	NA
isoComp_00206706	geneComp_00051416	ENST00000491955	ENSG00000130830	MPP1	no	partial	0.365	0.252	-0.113	0.0213709	TRUE
isoComp_00301554	geneComp_00079559	ENST00000647896	ENSG00000261175	LINC02188	no	partial	0.793	0.412	-0.381	0.0215409	TRUE
isoComp_00225589	geneComp_00053923	ENST00000276960	ENSG00000147912	FBXO10	no	partial	0	0.143	0.143	0.0220008	TRUE
isoComp_00263095	geneComp_00060189	ENST00000541517	ENSG00000186815	TPCN1	no	partial	0.343	0.14	-0.203	0.0220008	NA
isoComp_00167983	geneComp_00046440	ENST00000378045	ENSG00000069509	FUNDC1	no	partial	0.193	0.7	0.507	0.02244	TRUE
isoComp_00237511	geneComp_00055702	ENST00000403729	ENSG00000163297	ANTXR2	no	partial	1	0.773	-0.227	0.0225847	TRUE
isoComp_00268399	geneComp_00061206	ENST00000474361	ENSG00000197976	AKAP17A	no	partial	0.463	0.334	-0.129	0.0225847	NA
isoComp_00175186	geneComp_00047238	ENST00000546946	ENSG00000091039	OSBPL8	no	partial	0.169	0.015	-0.154	0.0225928	TRUE
isoComp_00214566	geneComp_00052458	ENST00000672801	ENSG00000137411	VARS2	no	partial	0.333	0.04	-0.293	0.0226309	TRUE
isoComp_00220861	geneComp_00053239	ENST00000650582	ENSG00000142867	BCL10	no	partial	0.232	0.07	-0.162	0.0230317	TRUE
isoComp_00262545	geneComp_00060073	ENST00000334801	ENSG00000186174	BCL9L	no	partial	0.429	0.214	-0.215	0.0232726	FALSE
isoComp_00173942	geneComp_00047090	ENST00000395915	ENSG00000087586	AURKA	no	partial	0.343	0.188	-0.155	0.0237792	NA
isoComp_00252650	geneComp_00058107	ENST00000469964	ENSG00000174564	IL20RB	no	partial	0.512	0.153	-0.359	0.0237792	TRUE
isoComp_00244542	geneComp_00056784	ENST00000534702	ENSG00000167701	GPT	no	partial	0.182	0.025	-0.157	0.0239145	TRUE
isoComp_00167970	geneComp_00046439	ENST00000290855	ENSG00000069493	CLEC2D	no	partial	0.363	0.238	-0.126	0.0239594	TRUE
isoComp_00230735	geneComp_00054667	ENST00000506891	ENSG00000155158	TTC39B	no	partial	0.071	0.189	0.118	0.0239594	TRUE
isoComp_00252802	geneComp_00058137	ENST00000311189	ENSG00000174775	HRAS	no	partial	0.623	0.305	-0.318	0.0239594	TRUE
isoComp_00289431	geneComp_00072218	ENST00000432521	ENSG00000238164	TNFRSF14-AS1	no	partial	0.664	0.125	-0.539	0.0239594	TRUE
isoComp_00245883	geneComp_00056966	ENST00000483364	ENSG00000168487	BMP1	no	partial	0.14	0.013	-0.126	0.0241139	TRUE
isoComp_00219367	geneComp_00053050	ENST00000590253	ENSG00000141349	G6PC3	no	partial	0.297	0.125	-0.172	0.0241723	TRUE
isoComp_00199455	geneComp_00050363	ENST00000417450	ENSG00000121964	GTDC1	no	partial	0.218	0.009	-0.209	0.024467	TRUE
isoComp_00225086	geneComp_00053857	ENST00000426821	ENSG00000147394	ZNF185	no	partial	0.42	0.067	-0.353	0.024467	TRUE
isoComp_00267137	geneComp_00060990	ENST00000395216	ENSG00000197162	ZNF785	no	partial	0.741	0.529	-0.211	0.0245907	TRUE
isoComp_00223837	geneComp_00053657	ENST00000613674	ENSG00000145725	PPIP5K2	no	partial	0.322	0.003	-0.319	0.0246951	TRUE
isoComp_00234928	geneComp_00055283	ENST00000581236	ENSG00000160606	TLCD1	no	partial	0.199	0.014	-0.185	0.0247666	TRUE
isoComp_00278464	geneComp_00065940	ENST00000464114	ENSG00000222009	BTBD19	no	partial	0.276	0	-0.276	0.0247666	TRUE
isoComp_00180227	geneComp_00047882	ENST00000699778	ENSG00000101901	ALG13	no	partial	0.321	0.008	-0.313	0.0248093	TRUE
isoComp_00297437	geneComp_00076897	ENST00000528551	ENSG00000254614	CAPN1-AS1	no	partial	0.408	0.111	-0.297	0.0248237	FALSE
isoComp_00249878	geneComp_00057665	ENST00000561311	ENSG00000171914	TLN2	no	partial	0.522	0.278	-0.243	0.0250496	TRUE
isoComp_00239001	geneComp_00055918	ENST00000471429	ENSG00000164002	EXO5	no	partial	0.283	0.008	-0.275	0.0252298	TRUE
isoComp_00208865	geneComp_00051692	ENST00000476789	ENSG00000132781	MUTYH	no	partial	0.243	0.024	-0.219	0.0254804	TRUE
isoComp_00173389	geneComp_00047034	ENST00000389675	ENSG00000086504	MRPL28	no	partial	0.211	0.028	-0.183	0.0257454	TRUE
isoComp_00232916	geneComp_00054983	ENST00000675282	ENSG00000158156	XKR8	no	partial	0.256	0	-0.256	0.025758	TRUE
isoComp_00170778	geneComp_00046732	ENST00000593523	ENSG00000077348	EXOSC5	no	partial	0.499	0.291	-0.208	0.0257794	TRUE
isoComp_00233215	geneComp_00055035	ENST00000529721	ENSG00000158555	GDPD5	no	partial	0.184	0.003	-0.182	0.0258343	TRUE
isoComp_00242027	geneComp_00056432	ENST00000370187	ENSG00000166167	BTRC	no	partial	0.3	0.467	0.167	0.0263206	FALSE
isoComp_00306817	geneComp_00083266	ENST00000610261	ENSG00000272602	ZNF595	no	partial	0.46	0.347	-0.113	0.0266012	TRUE
isoComp_00230524	geneComp_00054631	ENST00000442255	ENSG00000154814	OXNAD1	no	partial	0.468	0.347	-0.121	0.0270077	TRUE
isoComp_00244631	geneComp_00056801	ENST00000310157	ENSG00000167755	KLK6	no	partial	0.309	0.075	-0.234	0.0270077	TRUE
isoComp_00214191	geneComp_00052408	ENST00000541010	ENSG00000137094	DNAJB5	no	partial	0.957	0.793	-0.164	0.0270455	TRUE
isoComp_00249594	geneComp_00057619	ENST00000305264	ENSG00000171720	HDAC3	no	partial	0.16	0.347	0.187	0.0272812	TRUE
isoComp_00160788	geneComp_00045630	ENST00000373949	ENSG00000009780	FAM76A	no	partial	0.5	0.27	-0.23	0.0274031	TRUE
isoComp_00202610	geneComp_00050856	ENST00000541082	ENSG00000125898	FAM110A	no	partial	0.395	0.078	-0.317	0.0275906	FALSE
isoComp_00239976	geneComp_00056090	ENST00000683432	ENSG00000164610	RP9	no	partial	0.262	0.089	-0.173	0.0276191	TRUE
isoComp_00261968	geneComp_00059966	ENST00000530112	ENSG00000185670	ZBTB3	no	partial	0.649	0.2	-0.449	0.0276191	TRUE
isoComp_00234019	geneComp_00055154	ENST00000290866	ENSG00000159640	ACE	no	partial	0.084	0.239	0.155	0.0278702	TRUE
isoComp_00294168	geneComp_00074774	ENST00000507702	ENSG00000249673	NOP14-AS1	no	partial	0.288	0.034	-0.255	0.0279956	TRUE
isoComp_00214039	geneComp_00052388	ENST00000373474	ENSG00000136944	LMX1B	no	partial	0.437	0.058	-0.378	0.0282751	FALSE
isoComp_00235659	geneComp_00055370	ENST00000481297	ENSG00000161281	COX7A1	no	partial	0.236	0.362	0.126	0.0283227	TRUE
isoComp_00225133	geneComp_00053862	ENST00000520486	ENSG00000147419	CCDC25	no	partial	0.112	0.338	0.226	0.0283689	TRUE
isoComp_00184975	geneComp_00048466	ENST00000467916	ENSG00000105865	DUS4L	no	partial	0.609	0.056	-0.553	0.0285607	TRUE
isoComp_00208531	geneComp_00051652	ENST00000518370	ENSG00000132561	MATN2	no	partial	0.473	0.049	-0.424	0.0286079	TRUE
isoComp_00217009	geneComp_00052760	ENST00000544679	ENSG00000139180	NDUFA9	no	partial	0.333	0.218	-0.115	0.0287542	FALSE
isoComp_00261433	geneComp_00059884	ENST00000367701	ENSG00000185278	ZBTB37	no	partial	0.803	0.517	-0.286	0.0289724	TRUE
isoComp_00228312	geneComp_00054287	ENST00000322522	ENSG00000151689	INPP1	no	partial	0.793	0.315	-0.478	0.0293438	TRUE
isoComp_00312299	geneComp_00087626	ENST00000650690	ENSG00000286071	NA	no	partial	0.264	0.027	-0.237	0.0293887	FALSE
isoComp_00158869	geneComp_00045406	ENST00000695971	ENSG00000000971	CFH	no	partial	0.239	0	-0.239	0.0295463	TRUE
isoComp_00230200	geneComp_00054582	ENST00000357327	ENSG00000154310	TNIK	no	partial	0.159	0.026	-0.133	0.0295463	TRUE
isoComp_00293440	geneComp_00074333	ENST00000508424	ENSG00000248445	SEMA6A-AS1	no	partial	0.551	0.227	-0.323	0.0295463	FALSE
isoComp_00219819	geneComp_00053093	ENST00000579978	ENSG00000141552	ANAPC11	no	partial	0.229	0.089	-0.14	0.0295998	FALSE
isoComp_00238947	geneComp_00055910	ENST00000415111	ENSG00000163959	SLC51A	no	partial	0.55	0.427	-0.123	0.0299201	TRUE
isoComp_00178244	geneComp_00047619	ENST00000475965	ENSG00000100429	HDAC10	no	partial	0.864	0.636	-0.228	0.0300501	TRUE
isoComp_00207781	geneComp_00051554	ENST00000526043	ENSG00000131871	SELENOS	no	partial	0.113	0.324	0.211	0.0300501	TRUE
isoComp_00206045	geneComp_00051336	ENST00000597512	ENSG00000130475	FCHO1	no	partial	0.298	0	-0.298	0.0300776	FALSE
isoComp_00189000	geneComp_00048969	ENST00000687786	ENSG00000110074	FOXRED1	no	partial	0.679	0.494	-0.185	0.0300964	TRUE
isoComp_00208586	geneComp_00051658	ENST00000566430	ENSG00000132600	PRMT7	no	partial	0.239	0.045	-0.194	0.0300964	TRUE
isoComp_00260054	geneComp_00059606	ENST00000368172	ENSG00000183853	KIRREL1	no	partial	0.124	0.418	0.294	0.0300964	TRUE
isoComp_00265804	geneComp_00060797	ENST00000448051	ENSG00000196437	ZNF569	no	partial	0.996	0.092	-0.904	0.0300964	TRUE
isoComp_00282767	geneComp_00068447	ENST00000601701	ENSG00000228748	NA	no	partial	0.98	0.808	-0.172	0.0302991	FALSE
isoComp_00235687	geneComp_00055374	ENST00000579146	ENSG00000161395	PGAP3	no	partial	0.124	0.024	-0.1	0.0305776	TRUE
isoComp_00197778	geneComp_00050111	ENST00000535815	ENSG00000119714	GPR68	no	partial	0.599	0.264	-0.335	0.030812	TRUE
isoComp_00276183	geneComp_00064917	ENST00000259895	ENSG00000213780	GTF2H4	no	partial	0.656	0.371	-0.284	0.0308391	TRUE
isoComp_00218553	geneComp_00052969	ENST00000591451	ENSG00000140632	GLYR1	no	partial	0.212	0.042	-0.17	0.0309991	TRUE
isoComp_00246109	geneComp_00057000	ENST00000601142	ENSG00000168661	ZNF30	no	partial	0.307	0.006	-0.301	0.0309991	TRUE
isoComp_00260903	geneComp_00059772	ENST00000684558	ENSG00000184752	NDUFA12	no	partial	0.248	0.063	-0.184	0.0309991	TRUE
isoComp_00260337	geneComp_00059662	ENST00000417231	ENSG00000184182	UBE2F	no	partial	0.122	0	-0.122	0.031249	TRUE
isoComp_00219687	geneComp_00053084	ENST00000576241	ENSG00000141519	CCDC40	no	partial	0.236	0.042	-0.193	0.0315575	TRUE
isoComp_00264067	geneComp_00060417	ENST00000497036	ENSG00000188130	MAPK12	no	partial	0.737	0.478	-0.258	0.0315724	FALSE
isoComp_00204210	geneComp_00051064	ENST00000434248	ENSG00000128000	ZNF780B	no	partial	0.841	0.584	-0.257	0.0319763	TRUE
isoComp_00219315	geneComp_00053043	ENST00000579336	ENSG00000141293	SKAP1	no	partial	0.205	0.017	-0.187	0.0320368	TRUE
isoComp_00164426	geneComp_00046044	ENST00000320895	ENSG00000049656	CLPTM1L	no	partial	0.716	0.431	-0.284	0.0321099	TRUE
isoComp_00240865	geneComp_00056240	ENST00000685264	ENSG00000165240	ATP7A	no	partial	0.168	0.06	-0.109	0.0321801	TRUE
isoComp_00164301	geneComp_00046031	ENST00000683216	ENSG00000049167	ERCC8	no	partial	0	0.105	0.105	0.0322045	TRUE
isoComp_00181588	geneComp_00048068	ENST00000567172	ENSG00000103245	CIAO3	no	partial	0.372	0.156	-0.215	0.0328606	TRUE
isoComp_00187189	geneComp_00048757	ENST00000577716	ENSG00000108375	RNF43	no	partial	0.473	0.011	-0.462	0.0329231	TRUE
isoComp_00232706	geneComp_00054947	ENST00000338176	ENSG00000157869	RAB28	no	partial	0.198	0.009	-0.188	0.0329682	TRUE
isoComp_00255126	geneComp_00058583	ENST00000568703	ENSG00000177548	RABEP2	no	partial	0.13	0.021	-0.108	0.0331846	TRUE
isoComp_00242041	geneComp_00056433	ENST00000454524	ENSG00000166169	POLL	no	partial	0.219	0.013	-0.206	0.0333147	TRUE
isoComp_00271911	geneComp_00062821	ENST00000373026	ENSG00000204084	INPP5B	no	partial	0.188	0.029	-0.16	0.0334697	TRUE
isoComp_00210104	geneComp_00051867	ENST00000338564	ENSG00000134138	MEIS2	no	partial	0.265	0.048	-0.217	0.0335701	FALSE
isoComp_00185780	geneComp_00048573	ENST00000242057	ENSG00000106546	AHR	no	partial	0.981	0.699	-0.282	0.0335773	TRUE
isoComp_00230381	geneComp_00054607	ENST00000518893	ENSG00000154589	LY96	no	partial	0.414	0.096	-0.317	0.0335773	TRUE
isoComp_00167037	geneComp_00046340	ENST00000376785	ENSG00000066379	POLR1H	no	partial	0.269	0.003	-0.267	0.0336065	TRUE
isoComp_00165313	geneComp_00046144	ENST00000540564	ENSG00000057252	SOAT1	no	partial	0.104	0.227	0.123	0.0337273	TRUE
isoComp_00268369	geneComp_00061204	ENST00000376636	ENSG00000197969	VPS13A	no	partial	0.26	0.135	-0.125	0.0337273	FALSE
isoComp_00185095	geneComp_00048482	ENST00000484212	ENSG00000105967	TFEC	no	partial	0.463	0.267	-0.195	0.0339288	TRUE
isoComp_00243028	geneComp_00056567	ENST00000472960	ENSG00000166762	CATSPER2	no	partial	0.468	0.023	-0.445	0.0339602	TRUE
isoComp_00214073	geneComp_00052394	ENST00000520082	ENSG00000136999	CCN3	no	partial	0.5	0.002	-0.498	0.0339752	TRUE
isoComp_00289397	geneComp_00072198	ENST00000447147	ENSG00000238121	LINC00426	no	partial	0.129	0.021	-0.107	0.0344383	FALSE
isoComp_00239423	geneComp_00055984	ENST00000309439	ENSG00000164162	ANAPC10	no	partial	0.358	0.044	-0.314	0.0348187	TRUE
isoComp_00197549	geneComp_00050081	ENST00000592486	ENSG00000119559	C19orf25	no	partial	0.396	0.231	-0.165	0.0350565	TRUE
isoComp_00269773	geneComp_00061446	ENST00000697614	ENSG00000198805	PNP	no	partial	0.218	0.004	-0.214	0.0351677	TRUE
isoComp_00181861	geneComp_00048104	ENST00000564967	ENSG00000103485	QPRT	no	partial	0.565	0.317	-0.248	0.0354516	TRUE
isoComp_00243509	geneComp_00056639	ENST00000377087	ENSG00000167065	DUSP18	no	partial	0.154	0.049	-0.106	0.0358248	TRUE
isoComp_00183526	geneComp_00048281	ENST00000535102	ENSG00000104946	TBC1D17	no	partial	0.106	0.002	-0.104	0.0358844	FALSE
isoComp_00213441	geneComp_00052297	ENST00000429709	ENSG00000136518	ACTL6A	no	partial	0.532	0.307	-0.225	0.0360046	FALSE
isoComp_00202974	geneComp_00050904	ENST00000262633	ENSG00000126254	RBM42	no	partial	0.18	0.779	0.598	0.0368335	FALSE
isoComp_00266604	geneComp_00060914	ENST00000360171	ENSG00000196873	ZNG1C	no	partial	0.325	0.059	-0.267	0.0370933	TRUE
isoComp_00240646	geneComp_00056194	ENST00000377270	ENSG00000165060	FXN	no	partial	0.481	0	-0.481	0.0373757	TRUE
isoComp_00229859	geneComp_00054529	ENST00000591456	ENSG00000153936	HS2ST1	no	partial	0.087	0.24	0.153	0.0374173	TRUE
isoComp_00215734	geneComp_00052607	ENST00000461650	ENSG00000138134	STAMBPL1	no	partial	0.195	0.014	-0.181	0.0374887	TRUE
isoComp_00286635	geneComp_00070715	ENST00000423484	ENSG00000234444	ZNF736	no	partial	0.297	0.497	0.2	0.0376631	TRUE
isoComp_00221489	geneComp_00053333	ENST00000361936	ENSG00000143409	MINDY1	no	partial	0.498	0.342	-0.157	0.0378112	TRUE
isoComp_00239155	geneComp_00055940	ENST00000394339	ENSG00000164056	SPRY1	no	partial	0.485	0.089	-0.397	0.0378112	TRUE
isoComp_00247492	geneComp_00057215	ENST00000580793	ENSG00000169733	RFNG	no	partial	0.479	0.174	-0.305	0.0379176	TRUE
isoComp_00161580	geneComp_00045716	ENST00000486429	ENSG00000013297	CLDN11	no	partial	0	0.208	0.208	0.0379706	TRUE
isoComp_00250544	geneComp_00057778	ENST00000526034	ENSG00000172543	CTSW	no	partial	0.475	0	-0.475	0.0379706	TRUE
isoComp_00238858	geneComp_00055899	ENST00000697588	ENSG00000163932	PRKCD	no	partial	0.179	0.075	-0.104	0.0381045	TRUE
isoComp_00293758	geneComp_00074512	ENST00000686351	ENSG00000248932	COPB2-DT	no	partial	0.385	0.207	-0.178	0.0383091	FALSE
isoComp_00273215	geneComp_00063078	ENST00000628453	ENSG00000205045	SLFN12L	no	partial	0.448	0.694	0.246	0.0385613	TRUE
isoComp_00230916	geneComp_00054690	ENST00000285814	ENSG00000155438	NIFK	no	partial	0.89	0.639	-0.251	0.0388117	TRUE
isoComp_00233499	geneComp_00055076	ENST00000290039	ENSG00000158966	CACHD1	no	partial	0.213	0.031	-0.182	0.0388117	FALSE
isoComp_00260742	geneComp_00059745	ENST00000547751	ENSG00000184613	NELL2	no	partial	0.311	0.021	-0.29	0.0388117	FALSE
isoComp_00258634	geneComp_00059318	ENST00000347691	ENSG00000182400	TRAPPC6B	no	partial	0.214	0.093	-0.121	0.038944	TRUE
isoComp_00240839	geneComp_00056238	ENST00000488630	ENSG00000165233	CARD19	no	partial	0.415	0.294	-0.12	0.0390464	TRUE
isoComp_00191840	geneComp_00049343	ENST00000520687	ENSG00000113140	SPARC	no	partial	0.295	0.022	-0.273	0.0394033	TRUE
isoComp_00224143	geneComp_00053704	ENST00000274712	ENSG00000146007	ZMAT2	no	partial	0.778	0.969	0.191	0.0396033	TRUE
isoComp_00250653	geneComp_00057794	ENST00000501408	ENSG00000172663	TMEM134	no	partial	0.543	0.24	-0.303	0.0396033	TRUE
isoComp_00268926	geneComp_00061300	ENST00000330236	ENSG00000198315	ZKSCAN8	no	partial	0.446	0.62	0.174	0.0396033	FALSE
isoComp_00228799	geneComp_00054373	ENST00000338635	ENSG00000152422	XRCC4	no	partial	0.649	0.286	-0.363	0.0396777	TRUE
isoComp_00175445	geneComp_00047266	ENST00000480193	ENSG00000091732	ZC3HC1	no	partial	0.124	0.021	-0.103	0.0404759	FALSE
isoComp_00262568	geneComp_00060075	ENST00000587309	ENSG00000186185	KIF18B	no	partial	0.855	0.414	-0.442	0.0405182	TRUE
isoComp_00272883	geneComp_00062994	ENST00000391833	ENSG00000204673	AKT1S1	no	partial	0.515	0.388	-0.127	0.0407415	TRUE
isoComp_00165233	geneComp_00046130	ENST00000448244	ENSG00000055950	MRPL43	no	partial	0.159	0.013	-0.146	0.0411581	TRUE
isoComp_00261166	geneComp_00059829	ENST00000558065	ENSG00000185033	SEMA4B	no	partial	0.345	0.179	-0.166	0.0413004	TRUE
isoComp_00290261	geneComp_00072801	ENST00000613806	ENSG00000240401	NA	no	partial	0.07	0.241	0.171	0.0417683	TRUE
isoComp_00234066	geneComp_00055158	ENST00000508789	ENSG00000159685	CHCHD6	no	partial	0.273	0.102	-0.171	0.0421317	TRUE
isoComp_00245020	geneComp_00056860	ENST00000531922	ENSG00000167994	RAB3IL1	no	partial	0.756	0.554	-0.202	0.0421487	TRUE
isoComp_00224227	geneComp_00053720	ENST00000631498	ENSG00000146122	DAAM2	no	partial	0.449	0.222	-0.226	0.0422218	TRUE
isoComp_00177847	geneComp_00047565	ENST00000551731	ENSG00000100299	ARSA	no	partial	0.026	0.181	0.154	0.0427435	TRUE
isoComp_00185283	geneComp_00048509	ENST00000706158	ENSG00000106069	CHN2	no	partial	0.212	0.055	-0.158	0.0427435	TRUE
isoComp_00233712	geneComp_00055099	ENST00000374640	ENSG00000159189	C1QC	no	partial	0.865	0.641	-0.224	0.0427861	FALSE
isoComp_00242258	geneComp_00056470	ENST00000526240	ENSG00000166313	APBB1	no	partial	0.079	0.253	0.174	0.0429266	TRUE
isoComp_00228201	geneComp_00054269	ENST00000507439	ENSG00000151552	QDPR	no	partial	0.285	0.173	-0.112	0.0432636	FALSE
isoComp_00191553	geneComp_00049306	ENST00000652680	ENSG00000112759	SLC29A1	no	partial	0.309	0.104	-0.204	0.0436584	FALSE
isoComp_00229407	geneComp_00054456	ENST00000510586	ENSG00000153130	SCOC	no	partial	0.346	0.021	-0.326	0.0436796	TRUE
isoComp_00203817	geneComp_00051024	ENST00000570649	ENSG00000127564	PKMYT1	no	partial	0.36	0.092	-0.267	0.043836	FALSE
isoComp_00221843	geneComp_00053379	ENST00000362076	ENSG00000143612	C1orf43	no	partial	0.076	0.229	0.153	0.043836	TRUE
isoComp_00252076	geneComp_00058008	ENST00000690666	ENSG00000173852	DPY19L1	no	partial	0.464	0.328	-0.135	0.0439431	FALSE
isoComp_00176189	geneComp_00047336	ENST00000359415	ENSG00000095139	ARCN1	no	partial	0.238	0.058	-0.18	0.0439554	FALSE
isoComp_00285071	geneComp_00069790	ENST00000449923	ENSG00000232118	BACH1-AS1	no	partial	0.073	0.512	0.439	0.0441966	FALSE
isoComp_00288432	geneComp_00071683	ENST00000414554	ENSG00000236859	NIFK-AS1	no	partial	0.468	0.038	-0.43	0.0446261	TRUE
isoComp_00220687	geneComp_00053211	ENST00000459961	ENSG00000142621	FHAD1	no	partial	0.216	0.394	0.179	0.0446733	TRUE
isoComp_00240569	geneComp_00056178	ENST00000651358	ENSG00000164970	FAM219A	no	partial	0.339	0.214	-0.125	0.0447198	TRUE
isoComp_00169627	geneComp_00046610	ENST00000673233	ENSG00000074266	EED	no	partial	0.136	0.004	-0.131	0.0451587	TRUE
isoComp_00254595	geneComp_00058491	ENST00000530349	ENSG00000176973	FAM89B	no	partial	0.376	0.53	0.154	0.0452018	TRUE
isoComp_00212349	geneComp_00052147	ENST00000518148	ENSG00000135722	FBXL8	no	partial	0.997	0.611	-0.387	0.045353	TRUE
isoComp_00291730	geneComp_00073626	ENST00000480247	ENSG00000243415	NA	no	partial	0.416	0.182	-0.233	0.045353	FALSE
isoComp_00236527	geneComp_00055516	ENST00000294543	ENSG00000162542	TMCO4	no	partial	0.78	0.435	-0.346	0.0454145	FALSE
isoComp_00219974	geneComp_00053110	ENST00000269466	ENSG00000141642	ELAC1	no	partial	0.326	0.597	0.271	0.0456771	TRUE
isoComp_00224981	geneComp_00053841	ENST00000373165	ENSG00000147180	ZNF711	no	partial	0.477	0.118	-0.359	0.0456771	TRUE
isoComp_00304077	geneComp_00081348	ENST00000661696	ENSG00000267106	ZNF561-AS1	no	partial	0	0.226	0.226	0.0456771	TRUE
isoComp_00197937	geneComp_00050130	ENST00000420552	ENSG00000119862	LGALSL	no	partial	0.636	0.004	-0.632	0.045687	TRUE
isoComp_00252955	geneComp_00058167	ENST00000561540	ENSG00000174943	KCTD13	no	partial	0.465	0.312	-0.153	0.0457003	TRUE
isoComp_00258121	geneComp_00059235	ENST00000318110	ENSG00000181896	ZNF101	no	partial	0.147	0.018	-0.129	0.0459891	TRUE
isoComp_00232048	geneComp_00054862	ENST00000357206	ENSG00000157077	ZFYVE9	no	partial	0.422	0.021	-0.401	0.0460804	TRUE
isoComp_00161558	geneComp_00045711	ENST00000555329	ENSG00000012963	UBR7	no	partial	0.178	0.015	-0.163	0.046114	NA
isoComp_00185580	geneComp_00048545	ENST00000479544	ENSG00000106346	USP42	no	partial	0.377	0.123	-0.254	0.0461538	TRUE
isoComp_00298708	geneComp_00077688	ENST00000660979	ENSG00000256751	PLBD1-AS1	no	partial	0.055	0.429	0.374	0.0461538	FALSE
isoComp_00228805	geneComp_00054375	ENST00000282282	ENSG00000152433	ZNF547	no	partial	0.624	0.12	-0.504	0.0463418	TRUE
isoComp_00216211	geneComp_00052672	ENST00000559798	ENSG00000138604	GLCE	no	partial	0.121	0.226	0.105	0.0463724	FALSE
isoComp_00258191	geneComp_00059247	ENST00000373789	ENSG00000182010	RTKN2	no	partial	0.972	0.725	-0.247	0.0470273	TRUE
isoComp_00291845	geneComp_00073700	ENST00000468984	ENSG00000243667	DNAAF10	no	partial	0	0.148	0.148	0.0470273	FALSE
isoComp_00165007	geneComp_00046109	ENST00000557971	ENSG00000054690	PLEKHH1	no	partial	0.295	0.028	-0.267	0.0471142	TRUE
isoComp_00236885	geneComp_00055579	ENST00000366983	ENSG00000162772	ATF3	no	partial	0.15	0	-0.15	0.047274	TRUE
isoComp_00189894	geneComp_00049073	ENST00000537852	ENSG00000111196	MAGOHB	no	partial	0	0.136	0.136	0.047274	TRUE
isoComp_00311698	geneComp_00087209	ENST00000431044	ENSG00000284874	NA	no	partial	0.359	0	-0.359	0.0475336	TRUE
isoComp_00193559	geneComp_00049555	ENST00000335934	ENSG00000115129	TP53I3	no	partial	0.148	0.356	0.208	0.0475482	TRUE
isoComp_00175187	geneComp_00047238	ENST00000547540	ENSG00000091039	OSBPL8	no	partial	0.13	0.005	-0.125	0.0476895	TRUE
isoComp_00224590	geneComp_00053786	ENST00000450302	ENSG00000146757	ZNF92	no	partial	0.296	0.012	-0.284	0.0478458	TRUE
isoComp_00254678	geneComp_00058503	ENST00000317578	ENSG00000177045	SIX5	no	partial	0.5	0.826	0.326	0.0479437	TRUE
isoComp_00259893	geneComp_00059571	ENST00000394106	ENSG00000183723	CMTM4	no	partial	0.803	0.589	-0.214	0.048018	TRUE
isoComp_00161674	geneComp_00045725	ENST00000394514	ENSG00000013561	RNF14	no	partial	0.38	0.228	-0.153	0.0483314	TRUE
isoComp_00231914	geneComp_00054846	ENST00000559454	ENSG00000156958	GALK2	no	partial	0.25	0.019	-0.231	0.0485026	TRUE
isoComp_00293212	geneComp_00074217	ENST00000513560	ENSG00000248092	NNT-AS1	no	partial	0.923	0.555	-0.368	0.0485529	FALSE
isoComp_00194637	geneComp_00049676	ENST00000475360	ENSG00000115840	SLC25A12	no	partial	0.079	0.228	0.148	0.0488623	TRUE
isoComp_00215319	geneComp_00052549	ENST00000569936	ENSG00000137868	STRA6	no	partial	0.16	0.051	-0.109	0.04906	TRUE
isoComp_00224144	geneComp_00053704	ENST00000506644	ENSG00000146007	ZMAT2	no	partial	0.202	0.017	-0.185	0.0492406	TRUE
isoComp_00251318	geneComp_00057882	ENST00000525136	ENSG00000173137	ADCK5	no	partial	0.228	0.028	-0.2	0.0497505	TRUE
isoComp_00401866	geneComp_00101969	ENST00000300006	ENSG00000166780	BMERB1	complete	partial	0.737	0.532	-0.206	0.000292077	TRUE
isoComp_00416682	geneComp_00104571	ENST00000696150	ENSG00000181404	WASHC1	complete	partial	0.148	0.264	0.116	0.00156259	TRUE
isoComp_00370381	geneComp_00097447	ENST00000257694	ENSG00000135241	PNPLA8	complete	partial	0.5	0.291	-0.209	0.00171057	TRUE
isoComp_00374141	geneComp_00097948	ENST00000432245	ENSG00000137868	STRA6	complete	partial	0.172	0.28	0.108	0.00352294	TRUE
isoComp_00418879	geneComp_00105005	ENST00000368172	ENSG00000183853	KIRREL1	complete	partial	0.245	0.418	0.173	0.00381888	NA
isoComp_00352383	geneComp_00094954	ENST00000238721	ENSG00000115129	TP53I3	complete	partial	0.537	0.39	-0.146	0.00431973	TRUE
isoComp_00408941	geneComp_00103105	ENST00000302628	ENSG00000172137	CALB2	complete	partial	0.708	0.449	-0.259	0.00460041	TRUE
isoComp_00363718	geneComp_00096574	ENST00000467188	ENSG00000129007	CALML4	complete	partial	0.128	0.289	0.16	0.00474962	NA
isoComp_00392990	geneComp_00100572	ENST00000392910	ENSG00000159840	ZYX	complete	partial	0.087	0.208	0.121	0.00495994	TRUE
isoComp_00408312	geneComp_00103004	ENST00000328089	ENSG00000171621	SPSB1	complete	partial	0.506	0.613	0.107	0.00509347	FALSE
isoComp_00417379	geneComp_00104699	ENST00000573266	ENSG00000182310	SPACA6	complete	partial	0.279	0.482	0.203	0.00579709	FALSE
isoComp_00401083	geneComp_00101869	ENST00000526240	ENSG00000166313	APBB1	complete	partial	0.137	0.253	0.116	0.00631082	NA
isoComp_00423606	geneComp_00105998	ENST00000237283	ENSG00000189007	ADAT2	complete	partial	0.226	0.123	-0.102	0.00835954	TRUE
isoComp_00350420	geneComp_00094712	ENST00000371383	ENSG00000112796	ENPP5	complete	partial	0.874	0.645	-0.229	0.00908533	FALSE
isoComp_00405275	geneComp_00102453	ENST00000306315	ENSG00000168916	ZNF608	complete	partial	0.188	0.297	0.109	0.0111104	FALSE
isoComp_00378799	geneComp_00098509	ENST00000269466	ENSG00000141642	ELAC1	complete	partial	0.475	0.597	0.121	0.0111401	NA
isoComp_00394779	geneComp_00100819	ENST00000576153	ENSG00000161921	CXCL16	complete	partial	0.133	0.298	0.165	0.0112139	TRUE
isoComp_00319373	geneComp_00091007	ENST00000601877	ENSG00000008382	MPND	complete	partial	0.216	0.352	0.136	0.0128744	TRUE
isoComp_00418779	geneComp_00104980	ENST00000331456	ENSG00000183763	TRAIP	complete	partial	0.654	0.532	-0.122	0.0141367	FALSE
isoComp_00397268	geneComp_00101234	ENST00000295992	ENSG00000163710	PCOLCE2	complete	partial	0.309	0.417	0.108	0.0149331	FALSE
isoComp_00418782	geneComp_00104980	ENST00000477546	ENSG00000183763	TRAIP	complete	partial	0.269	0.43	0.161	0.01547	FALSE
isoComp_00422407	geneComp_00105690	ENST00000488957	ENSG00000187527	ATP13A5	complete	partial	0.217	0.324	0.107	0.0168807	NA
isoComp_00359074	geneComp_00095871	ENST00000396148	ENSG00000123080	CDKN2C	complete	partial	0.676	0.467	-0.209	0.0177323	FALSE
isoComp_00405377	geneComp_00102467	ENST00000491746	ENSG00000168970	JMJD7-PLA2G4B	complete	partial	0.223	0.347	0.124	0.0192352	TRUE
isoComp_00388987	geneComp_00099978	ENST00000284440	ENSG00000154277	UCHL1	complete	partial	0.627	0.512	-0.115	0.021415	TRUE
isoComp_00327825	geneComp_00091950	ENST00000675504	ENSG00000072501	SMC1A	complete	partial	0.142	0.271	0.129	0.0218039	TRUE
isoComp_00342598	geneComp_00093714	ENST00000262643	ENSG00000105173	CCNE1	complete	partial	0.432	0.565	0.134	0.0221329	FALSE
isoComp_00345937	geneComp_00094143	ENST00000584517	ENSG00000108244	KRT23	complete	partial	0.12	0.321	0.201	0.0233412	TRUE
isoComp_00337437	geneComp_00093062	ENST00000267615	ENSG00000100605	ITPK1	complete	partial	0.79	0.674	-0.116	0.0234647	TRUE
isoComp_00415019	geneComp_00104186	ENST00000578979	ENSG00000178921	PFAS	complete	partial	0.092	0.2	0.107	0.0242293	TRUE
isoComp_00321487	geneComp_00091242	ENST00000371571	ENSG00000026559	KCNG1	complete	partial	0.298	0.112	-0.186	0.0245519	TRUE
isoComp_00420622	geneComp_00105343	ENST00000333130	ENSG00000185608	MRPL40	complete	partial	0.404	0.57	0.166	0.0246153	TRUE
isoComp_00407459	geneComp_00102837	ENST00000306077	ENSG00000170876	TMEM43	complete	partial	0.905	0.78	-0.126	0.0251298	TRUE
isoComp_00405376	geneComp_00102467	ENST00000490848	ENSG00000168970	JMJD7-PLA2G4B	complete	partial	0.777	0.653	-0.124	0.0261928	TRUE
isoComp_00387860	geneComp_00099813	ENST00000488333	ENSG00000152763	DNAI4	complete	partial	0.153	0.296	0.143	0.0271014	NA
isoComp_00388231	geneComp_00099855	ENST00000506597	ENSG00000153130	SCOC	complete	partial	0.118	0.256	0.138	0.0299811	TRUE
isoComp_00394771	geneComp_00100818	ENST00000293777	ENSG00000161920	MED11	complete	partial	0.511	0.628	0.117	0.0299811	TRUE
isoComp_00379793	geneComp_00098655	ENST00000369483	ENSG00000143061	IGSF3	complete	partial	0.418	0.658	0.24	0.0303987	TRUE
isoComp_00427158	geneComp_00106597	ENST00000594944	ENSG00000197951	ZNF71	complete	partial	0.132	0.236	0.105	0.0307149	TRUE
isoComp_00394196	geneComp_00100742	ENST00000444095	ENSG00000160999	SH2B2	complete	partial	0.686	0.49	-0.196	0.0308898	TRUE
isoComp_00414378	geneComp_00104057	ENST00000463472	ENSG00000177989	CIMAP1B	complete	partial	0.325	0.225	-0.1	0.0325716	NA
isoComp_00326850	geneComp_00091847	ENST00000435532	ENSG00000069869	NEDD4	complete	partial	0.294	0.436	0.142	0.0335459	TRUE
isoComp_00407460	geneComp_00102837	ENST00000432444	ENSG00000170876	TMEM43	complete	partial	0.095	0.22	0.126	0.034436	TRUE
isoComp_00406525	geneComp_00102648	ENST00000472441	ENSG00000169908	TM4SF1	complete	partial	0.109	0.218	0.109	0.0346011	TRUE
isoComp_00328297	geneComp_00091994	ENST00000382199	ENSG00000073792	IGF2BP2	complete	partial	0.68	0.44	-0.24	0.0349791	TRUE
isoComp_00338717	geneComp_00093231	ENST00000619850	ENSG00000101447	FAM83D	complete	partial	0.624	0.516	-0.108	0.0355498	FALSE
isoComp_00418495	geneComp_00104919	ENST00000329797	ENSG00000183484	GPR132	complete	partial	0.52	0.371	-0.149	0.0358985	NA
isoComp_00350419	geneComp_00094712	ENST00000230565	ENSG00000112796	ENPP5	complete	partial	0.096	0.252	0.156	0.0417838	FALSE
isoComp_00436786	geneComp_00111048	ENST00000682710	ENSG00000219545	UMAD1	complete	partial	0.004	0.135	0.131	0.0438013	TRUE
isoComp_00318355	geneComp_00090881	ENST00000501740	ENSG00000005187	ACSM3	complete	partial	0.088	0.243	0.155	0.046254	NA
isoComp_00365044	geneComp_00096761	ENST00000371817	ENSG00000130635	COL5A1	complete	partial	0.542	0.647	0.105	0.0462857	FALSE
isoComp_00406524	geneComp_00102648	ENST00000305366	ENSG00000169908	TM4SF1	complete	partial	0.885	0.769	-0.116	0.0465351	TRUE
isoComp_00393826	geneComp_00100693	ENST00000409109	ENSG00000160703	NLRX1	complete	partial	0.663	0.798	0.136	0.0474952	FALSE
isoComp_00338716	geneComp_00093231	ENST00000619304	ENSG00000101447	FAM83D	complete	partial	0.376	0.484	0.108	0.0479369	FALSE
isoComp_00331434	geneComp_00092330	ENST00000395544	ENSG00000083290	ULK2	complete	partial	0.702	0.541	-0.161	0.0482994	TRUE
isoComp_00394773	geneComp_00100818	ENST00000575284	ENSG00000161920	MED11	complete	partial	0.422	0.291	-0.13	0.0490264	TRUE
isoComp_00325626	geneComp_00091708	ENST00000369679	ENSG00000065615	CYB5R4	complete	partial	0.323	0.445	0.122	0.0491098	TRUE
isoComp_00368079	geneComp_00097161	ENST00000403627	ENSG00000133193	FAM104A	complete	partial	0.344	0.512	0.167	0.0493289	TRUE

## Sheet: Supplementary Table 3A
Supplementary Table 3A. Gene ontology and pathway enrichment analysis for comparison no vs complete response
# background genes	# genes	category	description	FDR value	genes	network.SUID	nodes.SUID	p-value	term name	transferred FDR value
11512	143	COMPARTMENTS	Intracellular	7.97E-13	ERCC1|PPP1R15A|KLHL20|RIPK3|AURKA|PLCG1|UROD|CORO7|PPP1R1B|ELP3|RIPK1|PPP2R3C|GINS1|GAB1|ILVBL|EPB41L5|NGEF|ZAP70|ERCC8|CREM|PIP5K1B|PMS2|G6PC3|EAF2|KLHL8|GTF2H2|DLAT|CD96|LY96|ACE|WDR90|HDAC11|HSP90B1|NOD2|PRKDC|MCM9|LILRB1|CAMK2G|EML4|ATRIP|PSEN1|RARB|SF3B1|SIRT6|SKAP1|SNRNP48|SDSL|OAS2|ATF3|IMPDH1|EPB41|MLH3|ERCC6|PXK|RASSF1|POT1|CREB5|NR3C2|REV3L|PNP|PTGS1|DCAF6|SHOC2|RAP1A|TAF5|FLNA|POLL|PRK…	65928	58950|59091|59112|59157|59172|59322|59433|59115|59472|59481|59166|59550|59574|59349|59601|59637|59682|59400|59028|59751|59337|58986|59802|59847|59121|58998|59880|59907|59913|59952|59973|60000|60054|60060|59016|59577|60162|60192|59385|60126|60246|60294|59592|60003|59343|60315|59604|60069|59106|60024|59640|58980|59010|59925|60297|60108|59754|59958|58953|60330|60615|59733|59094|60369|59868|60666|601…	3.46E-16	GOCC:0005622	1.2098541678603887
3358	72	GO Biological Process	Response to stress	7.11E-12	ERCC1|PPP1R15A|RIPK3|AURKA|LILRB3|RIPK1|SLC12A2|ZAP70|ERCC8|PMS2|GTF2H2|CD96|LY96|KCNMA1|ACE|HSP90B1|NOD2|PRKDC|MCM9|LILRB1|ATRIP|PSEN1|SIRT6|OAS2|ATF3|SCNN1B|MLH3|ERCC6|PXK|RASSF1|REV3L|PTGS1|FCGR3A|FLNA|POLL|PAXX|RAD54L|MAP3K20|SYK|HDAC6|LILRB2|TDG|MAP2K7|CBS|SLC8A1|DYSF|NLRX1|NFATC4|DGKZ|NCK1|HFE|IRF5|FXN|RAD51B|PDK2|XRCC4|SMUG1|CLOCK|CRADD|XRCC3|MAP2K6|PLA2G4C|IRAK4|POLD2|RECQL4|ACD|IKBKG|TLR…	65928	58950|59091|59157|59172|59412|59166|59583|59400|59028|58986|58998|59907|59913|59922|59952|60054|60060|59016|59577|60162|60126|60246|60003|60069|59106|60459|58980|59010|59925|60297|58953|60615|59706|60666|60120|59004|60720|60753|59406|59181|59415|60837|59517|60156|60699|60792|60906|60912|59355|59100|59436|60969|59760|60732|59892|59022|60681|60321|59505|58992|59511|59361|60933|60555|60726|60531|591…	9.07E-16	GO:0006950	1.1148130399270233
744	33	GO Biological Process	Cellular response to DNA damage stimulus	1.72E-11	ERCC1|PPP1R15A|ERCC8|PMS2|GTF2H2|PRKDC|MCM9|ATRIP|PSEN1|SIRT6|MLH3|ERCC6|RASSF1|REV3L|POLL|PAXX|RAD54L|MAP3K20|TDG|NFATC4|DGKZ|RAD51B|XRCC4|SMUG1|CLOCK|CRADD|XRCC3|MAP2K6|POLD2|RECQL4|ACD|IKBKG|MUTYH	65928	58950|59091|59028|58986|58998|59016|59577|60126|60246|60003|58980|59010|60297|58953|60120|59004|60720|60753|60837|60912|59355|60732|59022|60681|60321|59505|58992|59511|60555|60726|60531|59160|59778	5.22E-15	GO:0006974	1.076447155309245
125	15	STRING Clusters	DNA repair pathways, full network, and HDR through Homologous Recombination (HRR)	1.39E-9	ERCC1|MND1|ERCC8|PMS2|PRKDC|ATRIP|MLH3|ERCC6|REV3L|POLL|PAXX|RAD54L|RAD51B|XRCC4|XRCC3	65928	58950|59301|59028|58986|59016|60126|58980|59010|58953|60120|59004|60720|60732|59022|58992	6.07E-13	CL:6144	0.8856985199745905
120	14	WikiPathways	DNA repair pathways, full network	4.08E-9	ERCC1|ERCC8|PMS2|GTF2H2|PRKDC|ERCC6|REV3L|RAP1A|POLL|TDG|XRCC4|SMUG1|POLD2|MUTYH	65928	58950|59028|58986|58998|59016|59010|58953|60369|60120|60837|59022|60681|60555|59778	5.22E-12	WP4946	0.8389339836910119
3931	72	GO Biological Process	Regulation of response to stimulus	4.53E-9	ERCC1|PPP1R15A|RIPK3|AURKA|PLCG1|CORO7|RIPK1|PPP2R3C|SLC12A2|NGEF|ZAP70|ERCC8|PIP5K1B|GTF2H2|CD96|LY96|ACE|NOD2|PRKDC|LILRB1|CAMK2G|ATRIP|PSEN1|SIRT6|SKAP1|ATF3|ERCC6|POT1|NR3C2|CD3E|FCGR3A|SHOC2|RAP1A|TAF5|FLNA|PRKACB|HLA-DQB1|MAP3K20|SYK|HDAC6|LILRB2|TGFB1I1|CARD11|MAP2K7|EPHB1|CBS|NLRX1|NFATC4|TNIK|LAMA2|DISC1|PHLDB2|DGKZ|NCK1|HFE|FXN|PDK2|CLOCK|DMTN|CRADD|XRCC3|KCTD13|MAP2K6|PAK4|IRAK4|SEZ6L2…	65928	58950|59091|59157|59172|59322|59115|59166|59550|59583|59682|59400|59028|59337|58998|59907|59913|59952|60060|59016|60162|60192|60126|60246|60003|59343|59106|59010|60108|59958|59721|59706|59094|60369|59868|60666|59475|59691|60753|59406|59181|59415|60846|59331|59517|59685|60156|60906|60912|60924|60900|60882|60669|59355|59100|59436|59760|59892|60321|60453|59505|58992|59127|59511|60960|60933|61062|591…	2.89E-12	GO:0048583	0.8343901797987169
312	19	GO Biological Process	Immune response-regulating signaling pathway	4.33E-8	PLCG1|ZAP70|LY96|NOD2|LILRB1|PSEN1|SKAP1|CD3E|FCGR3A|HLA-DQB1|SYK|LILRB2|MAP2K7|MAP2K6|IRAK4|IKBKG|THEMIS|TLR5|BCL10	65928	59322|59400|59913|60060|60162|60246|59343|59721|59706|59691|59406|59415|59517|59511|60933|59160|59373|59916|60771	3.31E-11	GO:0002764	0.7363512103646634
1518	40	GO Biological Process	Intracellular signal transduction	6.41E-8	PPP1R15A|RIPK3|PLCG1|PPP1R1B|RIPK1|ZAP70|NOD2|PRKDC|ATRIP|PSEN1|ERCC6|RASSF1|CD3E|FCGR3A|SHOC2|RAP1A|PRKACB|MAP3K20|SYK|CARD11|MAP2K7|SLC8A1|NLRX1|NFATC4|TNIK|DISC1|DGKZ|PDK2|CLOCK|DMTN|CRADD|PIK3C2G|MAP2K6|PAK4|PLA2G4C|IRAK4|IKBKG|DOCK1|BCL10|PIK3CB	65928	59091|59157|59322|59472|59166|59400|60060|59016|60126|60246|59010|60297|59721|59706|59094|60369|59475|60753|59406|59331|59517|60699|60906|60912|60924|60882|59355|59892|60321|60453|59505|59325|59511|60960|59361|60933|59160|60954|60771|59379	5.49E-11	GO:0035556	0.7193141970481183
1702	42	Reactome Pathways	Disease	1.36E-7	RIPK3|PLCG1|RIPK1|GAB1|PMS2|G6PC3|GTF2H2|LY96|HDAC11|NOD2|CAMK2G|EML4|ATRIP|PSEN1|IMPDH1|PNP|FCGR3A|SHOC2|RAP1A|TAF5|PRKACB|SYK|HDAC6|MAP2K7|NCK1|PCCB|RAD51B|XRCC4|CCNE2|NR4A1|STRA6|MAP2K6|SLC37A4|IRAK4|IKBKG|DOCK1|TLR5|B2M|PC|BTD|MUTYH|PIK3CB	65928	59157|59322|59166|59349|58986|59802|58998|59913|60000|60060|60192|59385|60126|60246|60024|60330|59706|59094|60369|59868|59475|59406|59181|59517|59100|60804|60732|59022|59175|60423|60978|59511|59811|60933|59160|60954|59916|59697|59805|61086|59778|59379	1.19E-10	HSA-1643685	0.6866461091629782
2749	55	GO Biological Process	Regulation of multicellular organismal process	1.73E-7	RIPK3|PLCG1|LILRB3|RIPK1|PPP2R3C|SLC12A2|GAB1|EPB41L5|ZAP70|EAF2|CD96|LY96|KCNMA1|ACE|NOD2|PRKDC|LILRB1|CAMK2G|PSEN1|RARB|SIRT6|OAS2|EPB41|PNP|CD3E|FCGR3A|SYK|HDAC6|LILRB2|TDG|TGFB1I1|CARD11|EPHB1|SLC8A1|NLRX1|NFATC4|KAT14|LAMA2|DISC1|PHLDB2|HFE|IRF5|FXN|CLOCK|DMTN|NR4A1|STRA6|MAP2K6|PAK4|SLC37A4|DOCK1|TLR5|B2M|BCL10|PIK3CB	65928	59157|59322|59412|59166|59550|59583|59349|59637|59400|59847|59907|59913|59922|59952|60060|59016|60162|60192|60246|60294|60003|60069|59640|60330|59721|59706|59406|59181|59415|60837|60846|59331|59685|60699|60906|60912|60660|60900|60882|60669|59436|60969|59760|60321|60453|60423|60978|59511|60960|59811|60954|59916|59697|60771|59379	1.76E-10	GO:0051239	0.6761953896871205
1877	44	GO Biological Process	Phosphate-containing compound metabolic process	1.76E-7	PPP1R15A|RIPK3|AURKA|PLCG1|RIPK1|ZAP70|PIP5K1B|G6PC3|DLAT|NOD2|PRKDC|CAMK2G|IMPDH1|PXK|PNP|CD3E|TAF5|PRKACB|MAP3K20|SYK|PPP2R3B|INPP1|TDG|QPRT|PSPH|AMPD3|CARD11|MAP2K7|EPHB1|TNIK|DGKZ|NCK1|PDK2|SMUG1|EPHX2|NNMT|PIK3C2G|MAP2K6|PAK4|PLA2G4C|IRAK4|IKBKG|AMPD2|PIK3CB	65928	59091|59157|59172|59322|59166|59400|59337|59802|59880|60060|59016|60192|60024|59925|60330|59721|59868|59475|60753|59406|60828|59367|60837|60852|60414|60438|59331|59517|59685|60924|59355|59100|59892|60681|60432|60336|59325|59511|60960|59361|60933|59160|60444|59379	1.91E-10	GO:0006796	0.675448733218585
1682	43	Monarch Phenotype	Abnormality of the immune system	2.68E-7	ERCC1|UROD|RIPK1|GINS1|ZAP70|ERCC8|PMS2|G6PC3|CD96|NOD2|PRKDC|PSEN1|RARB|SF3B1|EPB41|SCNN1B|ERCC6|POT1|REV3L|PNP|CD3E|FCGR3A|SHOC2|FLNA|HLA-DQB1|MAP3K20|CARD11|CBS|LAMA2|PHLDB2|HFE|PCCB|RAD51B|XRCC4|STRA6|SLC37A4|IRAK4|RECQL4|ACD|IKBKG|B2M|BCL10|BTD	65928	58950|59433|59166|59574|59400|59028|58986|59802|59907|60060|59016|60246|60294|59592|59640|60459|59010|60108|58953|60330|59721|59706|59094|60666|59691|60753|59331|60156|60900|60669|59436|60804|60732|59022|60978|59811|60933|60726|60531|59160|59697|60771|61086	2.2E-11	HP:0002715	0.6571865205971211
1513	40	Monarch Phenotype	Abnormality of body weight	3.04E-7	ERCC1|RIPK1|PPP2R3C|GINS1|SLC12A2|ZAP70|ERCC8|PMS2|G6PC3|CD96|RP9|MCM9|ATRIP|RARB|IMPDH1|EPB41|SCNN1B|MLH3|ERCC6|NR3C2|PNP|CD3E|SHOC2|FLNA|MAP3K20|LIPT1|PSPH|CBS|LAMA2|HFE|PCCB|XRCC4|STRA6|SLC37A4|RECQL4|IDH3B|ACD|BCL10|PC|AMPD2	65928	58950|59166|59550|59574|59583|59400|59028|58986|59802|59907|60021|59577|60126|60294|60024|59640|60459|58980|59010|59958|60330|59721|59094|60666|60753|59886|60414|60156|60900|59436|60804|59022|60978|59811|60726|59616|60531|60771|59805|60444	4.98E-11	HP:0004323	0.6517126416391246
519	22	GO Biological Process	Positive regulation of programmed cell death	4.85E-7	RIPK3|PLCG1|RIPK1|KCNMA1|ACE|PRKDC|LILRB1|PSEN1|RARB|ATF3|MAP3K20|SYK|HDAC6|MAP2K7|NFATC4|NCK1|IRF5|CRADD|NR4A1|MAP2K6|BCL10|PIK3CB	65928	59157|59322|59166|59922|59952|59016|60162|60246|60294|59106|60753|59406|59181|59517|60912|59100|60969|59505|60423|59511|60771|59379	6.5E-10	GO:0043068	0.6314258261397736
3054	56	COMPARTMENTS	Cytosol	7.37E-7	KLHL20|RIPK3|AURKA|PLCG1|UROD|PPP1R1B|RIPK1|EPB41L5|NGEF|ZAP70|PIP5K1B|ACE|HSP90B1|NOD2|CAMK2G|EML4|SKAP1|SDSL|IMPDH1|EPB41|PXK|PNP|DCAF6|SHOC2|RAP1A|FLNA|PRKACB|MAP3K20|SYK|HDAC6|TNFRSF25|INPP1|PSPH|MAP2K7|CBS|NFATC4|TNIK|DGKZ|NCK1|FXN|PDK2|XRCC4|CLOCK|DMTN|EPHX2|CRADD|NR4A1|MAP2K6|PAK4|IRAK4|IKBKG|DOCK1|B2M|BCL10|PC|AMPD2	65928	59112|59157|59172|59322|59433|59472|59166|59637|59682|59400|59337|59952|60054|60060|60192|59385|59343|59604|60024|59640|59925|60330|59733|59094|60369|60666|59475|60753|59406|59181|59499|59367|60414|59517|60156|60912|60924|59355|59100|59760|59892|59022|60321|60453|60432|59505|60423|59511|60960|60933|59160|60954|59697|60771|59805|60444	2.88E-9	GOCC:0005829	0.6132532512140949
4526	71	GO Cellular Component	Nuclear lumen	1.74E-6	ERCC1|KLHL20|AURKA|UROD|ELP3|PPP2R3C|GINS1|EPB41L5|ERCC8|PMS2|EAF2|KLHL8|GTF2H2|HDAC11|PRKDC|CAMK2G|ATRIP|PSEN1|RARB|SF3B1|SIRT6|SKAP1|SNRNP48|OAS2|ATF3|EPB41|MLH3|ERCC6|POT1|NR3C2|REV3L|DCAF6|SHOC2|TAF5|FLNA|POLL|PRKACB|PAXX|RAD54L|HDAC6|ALDH1B1|PPP2R3B|TDG|TGFB1I1|ELP4|SLC8A1|NFATC4|KAT14|TNIK|POC5|DGKZ|HFE|RAD51B|PDK2|XRCC4|SMUG1|CLOCK|CCNE2|CRADD|NR4A1|XRCC3|KCTD13|MAP2K6|PLA2G4C|POLD2|RECQL4…	65928	58950|59112|59172|59433|59481|59550|59574|59637|59028|58986|59847|59121|58998|60000|59016|60192|60126|60246|60294|59592|60003|59343|60315|60069|59106|59640|58980|59010|60108|59958|58953|59733|59094|59868|60666|60120|59475|59004|60720|59181|60798|60828|60837|60846|59484|60699|60912|60660|60924|59979|59355|59436|60732|59892|59022|60681|60321|59175|59505|60423|58992|59127|59511|59361|60555|60726|605…	5.95E-9	GO:0031981	0.5759450751717401
2692	51	GO Biological Process	Response to organic substance	4.05E-6	ERCC1|KLHL20|PLCG1|LILRB3|PPP1R1B|RIPK1|SLC12A2|GAB1|EPB41L5|CD96|LY96|KCNMA1|ACE|HSP90B1|NOD2|PRKDC|LILRB1|PSEN1|RARB|OAS2|ATF3|SCNN1B|NR3C2|SHOC2|RAP1A|FLNA|SYK|HDAC6|TNFRSF25|LILRB2|PSPH|MAP2K7|CBS|SLC8A1|TNIK|HFE|IRF5|PDK2|DMTN|NR4A1|NNMT|XRCC3|STRA6|MAP2K6|PAK4|SLC37A4|IRAK4|TLR5|FEZ1|B2M|BCL10	65928	58950|59112|59322|59412|59472|59166|59583|59349|59637|59907|59913|59922|59952|60054|60060|59016|60162|60246|60294|60069|59106|60459|59958|59094|60369|60666|59406|59181|59499|59415|60414|59517|60156|60699|60924|59436|60969|59892|60453|60423|60336|58992|60978|59511|60960|59811|60933|59916|60939|59697|60771	6.98E-9	GO:0010033	0.5392544976785332
2891	53	GO Biological Process	Heterocycle metabolic process	5.34E-6	ERCC1|MND1|UROD|PPP1R1B|ELP3|GINS1|RBM42|ERCC8|PMS2|GTF2H2|DLAT|RP9|PRKDC|MCM9|ATRIP|SF3B1|SIRT6|SNRNP48|OAS2|IMPDH1|MLH3|ERCC6|POT1|REV3L|PNP|TAF5|POLL|PAXX|RAD54L|MED18|TDG|QPRT|ELP4|AMPD3|CARD11|CBS|NFATC4|FXN|RAD51B|XRCC4|SMUG1|CCNE2|EPHX2|NR4A1|NNMT|XRCC3|POLD2|RECQL4|ACD|HMBS|AMPD2|BTD|MUTYH	65928	58950|59301|59433|59472|59481|59574|59589|59028|58986|58998|59880|60021|59016|59577|60126|59592|60003|60315|60069|60024|58980|59010|60108|58953|60330|59868|60120|59004|60720|59862|60837|60852|59484|60438|59331|60156|60912|59760|60732|59022|60681|59175|60432|60423|60336|58992|60555|60726|60531|59442|60444|61086|59778	9.53E-9	GO:0046483	0.5272458742971444
100	10	KEGG Pathways	T cell receptor signaling pathway	8.18E-6	PLCG1|ZAP70|CD3E|CARD11|MAP2K7|NCK1|PAK4|IKBKG|BCL10|PIK3CB	65928	59322|59400|59721|59331|59517|59100|60960|59160|60771|59379	2.43E-8	hsa04660	0.5087246696328677
1041	29	Reactome Pathways	Innate Immune System	9.19E-6	RIPK3|PLCG1|LILRB3|RIPK1|LY96|HSP90B1|NOD2|PRKDC|PSEN1|IMPDH1|PNP|FCGR3A|RAP1A|PRKACB|SYK|LILRB2|AMPD3|CARD11|MAP2K7|NLRX1|NCK1|MAP2K6|IRAK4|IKBKG|DOCK1|TLR5|B2M|BCL10|PIK3CB	65928	59157|59322|59412|59166|59913|60054|60060|59016|60246|60024|60330|59706|60369|59475|59406|59415|60438|59331|59517|60906|59100|59511|60933|59160|60954|59916|59697|60771|59379	1.21E-8	HSA-168249	0.503668448861389
517	20	Monarch Phenotype	Abnormal leukocyte morphology	1.17E-5	RIPK1|GINS1|ZAP70|PMS2|G6PC3|PSEN1|SF3B1|POT1|PNP|CD3E|FCGR3A|CARD11|PHLDB2|PCCB|XRCC4|SLC37A4|IRAK4|RECQL4|ACD|IKBKG	65928	59166|59574|59400|58986|59802|60246|59592|60108|60330|59721|59706|59331|60669|60804|59022|59811|60933|60726|60531|59160	1.81E-8	HP:0001881	0.4931814138253839
576	21	Monarch Phenotype	Abnormality of the lymphatic system	1.17E-5	ERCC1|UROD|RIPK1|GINS1|ZAP70|ERCC8|G6PC3|NOD2|RARB|SF3B1|EPB41|SCNN1B|ERCC6|PNP|CD3E|SHOC2|CARD11|HFE|STRA6|BCL10|BTD	65928	58950|59433|59166|59574|59400|59028|59802|60060|60294|59592|59640|60459|59010|60330|59721|59094|59331|59436|60978|60771|61086	2.09E-8	HP:0100763	0.4931814138253839
3085	54	GO Biological Process	Regulation of molecular function	1.56E-5	PPP1R15A|RIPK3|AURKA|PPP1R1B|ELP3|RIPK1|PPP2R3C|GINS1|EPB41L5|NGEF|GTF2H2|ACE|HSP90B1|NOD2|PSEN1|OAS2|EPB41|ERCC6|PXK|POT1|SHOC2|RAP1A|FLNA|SYK|HDAC6|PPP2R3B|TDG|ELP4|CARD11|MAP2K7|EPHB1|CBS|SLC8A1|NFATC4|PPP2R2D|DISC1|DGKZ|NCK1|HFE|CALML4|FXN|XRCC4|CLOCK|CCNE2|CRADD|NR4A1|MAP2K6|SLC37A4|ACD|IKBKG|DOCK1|B2M|BCL10|PIK3CB	65928	59091|59157|59172|59472|59481|59166|59550|59574|59637|59682|58998|59952|60054|60060|60246|60069|59640|59010|59925|60108|59094|60369|60666|59406|59181|60828|60837|59484|59331|59517|59685|60156|60699|60912|59553|60882|59355|59100|59436|59391|59760|59022|60321|59175|59505|60423|59511|59811|60531|59160|60954|59697|60771|59379	3.18E-8	GO:0065009	0.4806875401645538
485	19	GO Biological Process	Positive regulation of cell adhesion	1.61E-5	EPB41L5|ZAP70|NOD2|LILRB1|SKAP1|PNP|CD3E|FLNA|HLA-DQB1|SYK|LILRB2|CARD11|LAMA2|DISC1|NCK1|DMTN|DOCK1|B2M|BCL10	65928	59637|59400|60060|60162|59343|60330|59721|60666|59691|59406|59415|59331|60900|60882|59100|60453|60954|59697|60771	3.5E-8	GO:0045785	0.479317412396815
1379	32	UniProt Keywords	ATP-binding	1.68E-5	RIPK3|AURKA|RIPK1|ZAP70|PIP5K1B|HSP90B1|NOD2|PRKDC|MCM9|CAMK2G|OAS2|ERCC6|PRKACB|RAD54L|MAP3K20|SYK|MAP2K7|EPHB1|NLRX1|TNIK|DGKZ|PCCB|RAD51B|PDK2|PIK3C2G|XRCC3|MAP2K6|PAK4|IRAK4|RECQL4|PC|PIK3CB	65928	59157|59172|59166|59400|59337|60054|60060|59016|59577|60192|60069|59010|59475|60720|60753|59406|59517|59685|60906|60924|59355|60804|60732|59892|59325|58992|59511|60960|60933|60726|59805|59379	1.25E-7	KW-0067	0.47746907182741377
5095	73	UniProt Keywords	Cytoplasm	1.78E-5	ERCC1|KLHL20|RIPK3|AURKA|UROD|CORO7|PPP1R1B|ELP3|RIPK1|PPP2R3C|RBM42|EPB41L5|NGEF|ZAP70|CREM|ACE|WDR90|NOD2|AHCYL2|EML4|RARB|SKAP1|OAS2|IMPDH1|EPB41|PXK|RASSF1|NR3C2|PNP|SHOC2|RAP1A|FLNA|PRKACB|MAP3K20|SYK|HDAC6|TGFB1I1|ELP4|CARD11|RASSF7|MAP2K7|CBS|NFATC4|KAT14|TNIK|PPP2R2D|DISC1|PHLDB2|POC5|DGKZ|NCK1|IRF5|FXN|CLOCK|DMTN|EPHX2|CRADD|NR4A1|NNMT|XRCC3|TLN2|MAP2K6|PAK4|IRAK4|RECQL4|IKBKG|DOCK1|THEM…	65928	58950|59112|59157|59172|59433|59115|59472|59481|59166|59550|59589|59637|59682|59400|59751|59952|59973|60060|60150|59385|60294|59343|60069|60024|59640|59925|60297|59958|60330|59094|60369|60666|59475|60753|59406|59181|60846|59484|59331|60525|59517|60156|60912|60660|60924|59553|60882|60669|59979|59355|59100|60969|59760|60321|60453|60432|59505|60423|60336|58992|60363|59511|60960|60933|60726|59160|609…	1.59E-7	KW-0963	0.47495799976911063
1169	30	Monarch Phenotype	Abnormal cardiovascular system physiology	1.84E-5	ERCC1|ERCC8|PMS2|G6PC3|KCNMA1|ACE|NOD2|PSEN1|RARB|SF3B1|SCNN1B|MLH3|ERCC6|NR3C2|SHOC2|FLNA|LIPT1|CBS|DYSF|LAMA2|HFE|PCCB|FXN|PIK3C2G|KCTD13|STRA6|SLC37A4|IKBKG|B2M|HMBS	65928	58950|59028|58986|59802|59922|59952|60060|60246|60294|59592|60459|58980|59010|59958|59094|60666|59886|60156|60792|60900|59436|60804|59760|59325|59127|60978|59811|59160|59697|59442	3.93E-8	HP:0011025	0.47351821769904634
1539	34	GO Cellular Component	Catalytic complex	2.3E-5	PPP1R15A|KLHL20|RIPK1|ILVBL|ERCC8|KLHL8|GTF2H2|DLAT|HDAC11|PRKDC|SF3B1|ERCC6|REV3L|DCAF6|SHOC2|TAF5|HDAC6|PPP2R3B|QPRT|KAT14|PPP2R2D|DISC1|NCK1|PCCB|PDK2|CCNE2|CRADD|PIK3C2G|KCTD13|POLD2|IDH3B|IKBKG|SCLY|PIK3CB	65928	59091|59112|59166|59601|59028|59121|58998|59880|60000|59016|59592|59010|58953|59733|59094|59868|59181|60828|60852|60660|59553|60882|59100|60804|59892|59175|59505|59325|59127|60555|59616|59160|60984|59379	1.46E-7	GO:1902494	0.4638272163982407
43	7	GO Cellular Component	DNA repair complex	2.39E-5	ERCC1|ERCC8|PMS2|PRKDC|MLH3|PAXX|XRCC4	65928	58950|59028|58986|59016|58980|59004|59022	1.64E-7	GO:1990391	0.4621602099051862
181	12	WikiPathways	Ras signaling	2.65E-5	PLCG1|GAB1|ZAP70|RASSF1|SHOC2|RAP1A|PRKACB|CALML4|PAK4|PLA2G4C|IKBKG|PIK3CB	65928	59322|59349|59400|60297|59094|60369|59475|59391|60960|59361|59160|59379	6.79E-8	WP4223	0.4576754126063192
2121	42	GO Biological Process	Immune system process	2.93E-5	ERCC1|RIPK3|PLCG1|LILRB3|PPP2R3C|SLC12A2|ZAP70|PMS2|CD96|LY96|ACE|NOD2|PRKDC|LILRB1|PSEN1|SKAP1|OAS2|SCNN1B|PNP|CD3E|FCGR3A|FLNA|POLL|HLA-DQB1|SYK|LILRB2|CARD11|EPHB1|DYSF|NLRX1|NCK1|IRF5|XRCC4|DMTN|SLC37A4|IRAK4|IKBKG|DOCK1|THEMIS|TLR5|B2M|BCL10	65928	58950|59157|59322|59412|59550|59583|59400|58986|59907|59913|59952|60060|59016|60162|60246|59343|60069|60459|60330|59721|59706|60666|60120|59691|59406|59415|59331|59685|60792|60906|59100|60969|59022|60453|59811|60933|59160|60954|59373|59916|59697|60771	7.18E-8	GO:0002376	0.4533132379645891
101	9	KEGG Pathways	NF-kappa B signaling pathway	3.7E-5	PLCG1|RIPK1|ZAP70|LY96|SYK|CARD11|IRAK4|IKBKG|BCL10	65928	59322|59166|59400|59913|59406|59331|60933|59160|60771	3.09E-7	hsa04064	0.4431798275933005
100	9	KEGG Pathways	Toll-like receptor signaling pathway	3.7E-5	RIPK1|LY96|MAP2K7|IRF5|MAP2K6|IRAK4|IKBKG|TLR5|PIK3CB	65928	59166|59913|59517|60969|59511|60933|59160|59916|59379	2.86E-7	hsa04620	0.4431798275933005
78	8	KEGG Pathways	B cell receptor signaling pathway	3.7E-5	LILRB3|LILRB1|SYK|LILRB2|CARD11|IKBKG|BCL10|PIK3CB	65928	59412|60162|59406|59415|59331|59160|60771|59379	5.34E-7	hsa04662	0.4431798275933005
203	12	KEGG Pathways	Human immunodeficiency virus 1 infection	3.7E-5	PLCG1|RIPK1|CD3E|MAP2K7|NFATC4|CALML4|MAP2K6|PAK4|IRAK4|IKBKG|B2M|PIK3CB	65928	59322|59166|59721|59517|60912|59391|59511|60960|60933|59160|59697|59379	2.2E-7	hsa05170	0.4431798275933005
1435	31	KEGG Pathways	Metabolic pathways	3.89E-5	PLCG1|UROD|PIP5K1B|G6PC3|DLAT|AHCYL2|SIRT6|SDSL|IMPDH1|PNP|PTGS1|ALDH1B1|INPP1|LIPT1|QPRT|PSPH|AMPD3|CBS|DGKZ|PCCB|EPHX2|NNMT|PIK3C2G|PLA2G4C|IDH3B|HMBS|PC|SCLY|AMPD2|BTD|PIK3CB	65928	59322|59433|59337|59802|59880|60150|60003|59604|60024|60330|60615|60798|59367|59886|60852|60414|60438|60156|59355|60804|60432|60336|59325|59361|59616|59442|59805|60984|60444|61086|59379	9.27E-7	hsa01100	0.4410050398674293
1290	30	GO Cellular Component	Nuclear protein-containing complex	4.33E-5	ERCC1|PLCG1|GINS1|RBM42|ERCC8|CREM|PMS2|EAF2|GTF2H2|HDAC11|PRKDC|ATRIP|SF3B1|SNRNP48|ATF3|ERCC6|POT1|TAF5|FLNA|MED18|HDAC6|ELP4|KAT14|RAD51B|XRCC4|CLOCK|XRCC3|POLD2|ACD|THEMIS	65928	58950|59322|59574|59589|59028|59751|58986|59847|58998|60000|59016|60126|59592|60315|59106|59010|60108|59868|60666|59862|59181|59484|60660|60732|59022|60321|58992|60555|60531|59373	3.18E-7	GO:0140513	0.43635121036466346
124	9	KEGG Pathways	Yersinia infection	4.72E-5	PLCG1|ZAP70|PIP5K1B|MAP2K7|MAP2K6|IRAK4|IKBKG|DOCK1|PIK3CB	65928	59322|59400|59337|59517|59511|60933|59160|60954|59379	1.54E-6	hsa05135	0.4326058001365912
2168	42	Monarch Phenotype	Abnormality of metabolism/homeostasis	4.96E-5	ERCC1|UROD|RIPK1|SLC12A2|ZAP70|ERCC8|DLAT|RP9|NOD2|PSEN1|IMPDH1|EPB41|SCNN1B|ERCC6|NR3C2|PNP|CD3E|FCGR3A|SHOC2|FLNA|LIPT1|PSPH|CARD11|CBS|DYSF|LAMA2|HFE|PCCB|FXN|XRCC4|SLC37A4|IRAK4|RECQL4|IDH3B|IKBKG|DOCK1|B2M|BCL10|HMBS|PC|BTD|MUTYH	65928	58950|59433|59166|59583|59400|59028|59880|60021|60060|60246|60024|59640|60459|59010|59958|60330|59721|59706|59094|60666|59886|60414|59331|60156|60792|60900|59436|60804|59760|59022|59811|60933|60726|59616|59160|60954|59697|60771|59442|59805|61086|59778	1.31E-7	HP:0001939	0.4304518323509803
221	13	GO Molecular Function	Catalytic activity, acting on DNA	5.04E-5	PMS2|MCM9|MLH3|ERCC6|REV3L|POLL|RAD54L|TDG|RAD51B|SMUG1|XRCC3|RECQL4|MUTYH	65928	58986|59577|58980|59010|58953|60120|60720|60837|60732|60681|58992|60726|59778	7.15E-8	GO:0140097	0.4297569463554475
1107	28	GO Biological Process	Response to abiotic stimulus	5.62E-5	ERCC1|PPP1R1B|SLC12A2|ERCC8|GTF2H2|KCNMA1|ACE|HSP90B1|PRKDC|SIRT6|SCNN1B|ERCC6|RAD54L|MAP3K20|PSPH|MAP2K7|EPHB1|CBS|SLC8A1|NFATC4|DISC1|XRCC4|CLOCK|CRADD|NR4A1|STRA6|TLR5|BCL10	65928	58950|59472|59583|59028|58998|59922|59952|60054|59016|60003|60459|59010|60720|60753|60414|59517|59685|60156|60699|60912|60882|59022|60321|59505|60423|60978|59916|60771	1.6E-7	GO:0009628	0.4250263684430939
97	9	WikiPathways	B cell receptor signaling pathway	5.86E-5	PLCG1|GAB1|PIP5K1B|SYK|CARD11|NCK1|MAP2K6|IKBKG|BCL10	65928	59322|59349|59337|59406|59331|59100|59511|59160|60771	2.25E-7	WP23	0.42321023839819094
3533	57	GO Biological Process	Positive regulation of macromolecule metabolic process	6.13E-5	ERCC1|PPP1R15A|RIPK3|AURKA|RIPK1|PPP2R3C|GINS1|ERCC8|EAF2|LY96|ACE|NOD2|PRKDC|LILRB1|PSEN1|RARB|SF3B1|SIRT6|SKAP1|OAS2|ATF3|ERCC6|RASSF1|POT1|CREB5|PNP|CD3E|DCAF6|FCGR3A|RAP1A|TAF5|MED18|SYK|HDAC6|LILRB2|TGFB1I1|CARD11|MAP2K7|NFATC4|TNIK|DISC1|NCK1|HFE|IRF5|CLOCK|EPHX2|CRADD|NR4A1|NNMT|KCTD13|MAP2K6|ACD|IKBKG|TLR5|B2M|BCL10|PIK3CB	65928	58950|59091|59157|59172|59166|59550|59574|59028|59847|59913|59952|60060|59016|60162|60246|60294|59592|60003|59343|60069|59106|59010|60297|60108|59754|60330|59721|59733|59706|60369|59868|59862|59406|59181|59415|60846|59331|59517|60912|60924|60882|59100|59436|60969|60321|60432|59505|60423|60336|59127|59511|60531|59160|59916|59697|60771|59379	1.88E-7	GO:0010604	0.4212539525481585
2755	49	TISSUES	Hematopoietic system	6.88E-5	PPP1R15A|RIPK3|AURKA|PLCG1|LILRB3|UROD|PPP2R3C|ZAP70|GTF2H2|CD96|ACE|HSP90B1|NOD2|LILRB1|PSEN1|SIRT6|SKAP1|OAS2|IMPDH1|EPB41|RASSF1|NR3C2|REV3L|PNP|CD3E|PTGS1|FCGR3A|RAP1A|FLNA|POLL|HLA-DQB1|SYK|TNFRSF25|LILRB2|DYSF|NFATC4|TNIK|PHLDB2|NCK1|DMTN|XRCC3|MAP2K6|PLA2G4C|IRAK4|THEMIS|TLR5|B2M|BCL10|AMPD2	65928	59091|59157|59172|59322|59412|59433|59550|59400|58998|59907|59952|60054|60060|60162|60246|60003|59343|60069|60024|59640|60297|59958|58953|60330|59721|60615|59706|60369|60666|60120|59691|59406|59499|59415|60792|60912|60924|60669|59100|60453|58992|59511|59361|60933|59373|59916|59697|60771|60444	1.13E-7	BTO:0000570	0.41624115617644886
419	17	TISSUES	Lymphocytic leukemia cell	6.88E-5	PLCG1|RIPK1|ZAP70|CD96|PRKDC|EML4|PSEN1|SF3B1|CD3E|FLNA|PRKACB|SYK|CARD11|XRCC4|CCNE2|IRAK4|ACD	65928	59322|59166|59400|59907|59016|59385|60246|59592|59721|60666|59475|59406|59331|59022|59175|60933|60531	1.19E-7	BTO:0000744	0.41624115617644886
27	6	Monarch Phenotype	Uveitis	8.44E-5	ERCC1|ERCC8|NOD2|ERCC6|IKBKG|BCL10	65928	58950|59028|60060|59010|59160|60771	2.57E-7	HP:0000554	0.4073657553374345
739	22	GO Biological Process	Regulation of cytokine production	8.92E-5	RIPK3|RIPK1|CD96|LY96|NOD2|LILRB1|PSEN1|OAS2|PNP|CD3E|FCGR3A|SYK|LILRB2|CARD11|NLRX1|NFATC4|HFE|IRF5|SLC37A4|TLR5|B2M|BCL10	65928	59157|59166|59907|59913|60060|60162|60246|60069|60330|59721|59706|59406|59415|59331|60906|60912|59436|60969|59811|59916|59697|60771	2.9E-7	GO:0001817	0.40496351456238766
784	22	GO Cellular Component	Intracellular protein-containing complex	9.33E-5	KLHL20|ELP3|ERCC8|KLHL8|GTF2H2|PRKDC|CAMK2G|REV3L|DCAF6|RAP1A|TAF5|PRKACB|PAXX|PPP2R3B|ELP4|KAT14|PPP2R2D|XRCC4|KCTD13|POLD2|IKBKG|DOCK1	65928	59112|59481|59028|59121|58998|59016|60192|58953|59733|60369|59868|59475|59004|60828|59484|60660|59553|59022|59127|60555|59160|60954	7.63E-7	GO:0140535	0.40301183562535003
48	7	Monarch Phenotype	Short chin	9.8E-5	ERCC1|ERCC8|PRKDC|ERCC6|FLNA|XRCC4|RECQL4	65928	58950|59028|59016|59010|60666|59022|60726	3.21E-7	HP:0000331	0.4008773924307505
2506	45	GO Biological Process	Biosynthetic process	1.1E-4	UROD|PPP1R1B|ILVBL|PIP5K1B|G6PC3|GTF2H2|DLAT|NOD2|PSEN1|SIRT6|SDSL|ATF3|IMPDH1|ERCC6|POT1|REV3L|PNP|PTGS1|TAF5|POLL|MED18|SYK|INPP1|QPRT|PSPH|ELP4|AMPD3|CARD11|CBS|NFATC4|DGKZ|HFE|PCCB|FXN|NR4A1|NNMT|PIK3C2G|PLA2G4C|SLC37A4|POLD2|ACD|HMBS|PC|AMPD2|PIK3CB	65928	59433|59472|59601|59337|59802|58998|59880|60060|60246|60003|59604|59106|60024|59010|60108|58953|60330|60615|59868|60120|59862|59406|59367|60852|60414|59484|60438|59331|60156|60912|59355|59436|60804|59760|60423|60336|59325|59361|59811|60555|60531|59442|59805|60444|59379	3.51E-7	GO:0009058	0.3958607314841775
1525	33	GO Biological Process	Positive regulation of signal transduction	1.1E-4	RIPK3|CORO7|RIPK1|ZAP70|LY96|NOD2|PSEN1|ATF3|NR3C2|CD3E|SHOC2|RAP1A|FLNA|MAP3K20|SYK|TGFB1I1|CARD11|MAP2K7|NFATC4|TNIK|LAMA2|DISC1|NCK1|HFE|DMTN|CRADD|XRCC3|MAP2K6|IRAK4|IKBKG|TLR5|BCL10|PIK3CB	65928	59157|59115|59166|59400|59913|60060|60246|59106|59958|59721|59094|60369|60666|60753|59406|60846|59331|59517|60912|60924|60900|60882|59100|59436|60453|59505|58992|59511|60933|59160|59916|60771|59379	3.69E-7	GO:0009967	0.3958607314841775
103	9	GO Biological Process	T cell receptor signaling pathway	1.1E-4	PLCG1|ZAP70|PSEN1|SKAP1|CD3E|HLA-DQB1|IKBKG|THEMIS|BCL10	65928	59322|59400|60246|59343|59721|59691|59160|59373|60771	3.61E-7	GO:0050852	0.3958607314841775
30	6	GO Biological Process	Mismatch repair	1.2E-4	ERCC1|PMS2|MCM9|MLH3|TDG|MUTYH	65928	58950|58986|59577|58980|60837|59778	4.43E-7	GO:0006298	0.39208187539523753
105	9	GO Biological Process	Positive regulation of tumor necrosis factor superfamily cytokine production	1.2E-4	RIPK1|LY96|NOD2|PSEN1|OAS2|FCGR3A|SYK|NFATC4|BCL10	65928	59166|59913|60060|60246|60069|59706|59406|60912|60771	4.2E-7	GO:1903557	0.39208187539523753
1405	31	GO Biological Process	Regulation of phosphate metabolic process	1.4E-4	PPP1R15A|RIPK3|PPP1R1B|RIPK1|PPP2R3C|ACE|HSP90B1|NOD2|PRKDC|PSEN1|SIRT6|ERCC6|CD3E|RAP1A|SYK|HDAC6|LILRB2|MAP2K7|EPHB1|CBS|SLC8A1|TNIK|DGKZ|NCK1|HFE|PDK2|DMTN|CCNE2|MAP2K6|BCL10|PIK3CB	65928	59091|59157|59472|59166|59550|59952|60054|60060|59016|60246|60003|59010|59721|60369|59406|59181|59415|59517|59685|60156|60699|60924|59355|59100|59436|59892|60453|59175|59511|60771|59379	5.96E-7	GO:0019220	0.38538719643217617
695	21	GO Molecular Function	Protein domain specific binding	1.4E-4	ERCC1|RIPK1|EPB41L5|NOD2|PRKDC|LILRB1|PSEN1|SKAP1|SCNN1B|CD3E|SYK|TDG|CARD11|KAT14|NCK1|XRCC4|CRADD|KCTD13|IKBKG|DOCK1|BCL10	65928	58950|59166|59637|60060|59016|60162|60246|59343|60459|59721|59406|60837|59331|60660|59100|59022|59505|59127|59160|60954|60771	4.38E-7	GO:0019904	0.38538719643217617
763	22	Monarch Phenotype	Neoplasm	1.4E-4	UROD|GINS1|ZAP70|PMS2|CD96|NOD2|SF3B1|MLH3|ERCC6|POT1|PNP|SHOC2|FLNA|RAD54L|HFE|SLC37A4|RECQL4|ACD|IKBKG|BCL10|HMBS|MUTYH	65928	59433|59574|59400|58986|59907|60060|59592|58980|59010|60108|60330|59094|60666|60720|59436|59811|60726|60531|59160|60771|59442|59778	4.9E-7	HP:0002664	0.38538719643217617
1057	26	GO Biological Process	Cellular response to oxygen-containing compound	1.7E-4	RIPK3|PPP1R1B|RIPK1|GAB1|LY96|ACE|HSP90B1|NOD2|PRKDC|LILRB1|PSEN1|SCNN1B|RAP1A|FLNA|HDAC6|LILRB2|MAP2K7|SLC8A1|FXN|PDK2|DMTN|NR4A1|MAP2K6|TLR5|B2M|BCL10	65928	59157|59472|59166|59349|59913|59952|60054|60060|59016|60162|60246|60459|60369|60666|59181|59415|59517|60699|59760|59892|60453|60423|59511|59916|59697|60771	7.92E-7	GO:1901701	0.37695510786217257
473	17	Monarch Phenotype	Abnormal cellular physiology	1.7E-4	ERCC1|RIPK1|ZAP70|ERCC8|DLAT|ERCC6|PNP|CD3E|FCGR3A|FLNA|LIPT1|CARD11|HFE|FXN|IRAK4|IKBKG|B2M	65928	58950|59166|59400|59028|59880|59010|60330|59721|59706|60666|59886|59331|59436|59760|60933|59160|59697	6.15E-7	HP:0011017	0.37695510786217257
840	23	Monarch Phenotype	Functional abnormality of the gastrointestinal tract	1.7E-4	RIPK1|SLC12A2|ZAP70|ERCC8|PMS2|PSEN1|MLH3|ERCC6|REV3L|PNP|CD3E|FLNA|MAP3K20|PSPH|CBS|DYSF|LAMA2|HFE|FXN|SLC37A4|RECQL4|B2M|HMBS	65928	59166|59583|59400|59028|58986|60246|58980|59010|58953|60330|59721|60666|60753|60414|60156|60792|60900|59436|59760|59811|60726|59697|59442	6.3E-7	HP:0012719	0.37695510786217257
111	8	KEGG Pathways	TNF signaling pathway	1.8E-4	RIPK3|RIPK1|NOD2|CREB5|MAP2K7|MAP2K6|IKBKG|PIK3CB	65928	59157|59166|60060|59754|59517|59511|59160|59379	6.28E-6	hsa04668	0.3744727494896694
112	8	KEGG Pathways	Neurotrophin signaling pathway	1.8E-4	PLCG1|GAB1|PSEN1|RAP1A|MAP2K7|CALML4|IRAK4|PIK3CB	65928	59322|59349|60246|60369|59517|59391|60933|59379	6.68E-6	hsa04722	0.3744727494896694
715	21	Monarch Phenotype	Abnormal liver morphology	1.8E-4	ERCC1|UROD|RIPK1|ZAP70|ERCC8|G6PC3|CD96|SF3B1|ERCC6|CD3E|SHOC2|CBS|HFE|PCCB|XRCC4|SLC37A4|IRAK4|RECQL4|B2M|PC|BTD	65928	58950|59433|59166|59400|59028|59802|59907|59592|59010|59721|59094|60156|59436|60804|59022|59811|60933|60726|59697|59805|61086	6.85E-7	HP:0410042	0.3744727494896694
721	21	Monarch Phenotype	Recurrent infections	2.0E-4	UROD|RIPK1|GINS1|ZAP70|G6PC3|PRKDC|SCNN1B|PNP|CD3E|FCGR3A|FLNA|MAP3K20|CARD11|LAMA2|HFE|SLC37A4|IRAK4|IKBKG|B2M|BCL10|BTD	65928	59433|59166|59574|59400|59802|59016|60459|60330|59721|59706|60666|60753|59331|60900|59436|59811|60933|59160|59697|60771|61086	7.81E-7	HP:0002719	0.36989700043360185
1373	30	GO Biological Process	Regulation of response to stress	2.3E-4	ERCC1|PPP1R15A|PLCG1|RIPK1|PPP2R3C|SLC12A2|ERCC8|CD96|ACE|NOD2|PRKDC|LILRB1|ATRIP|SIRT6|ERCC6|POT1|TAF5|FLNA|MAP3K20|SYK|HDAC6|MAP2K7|EPHB1|NLRX1|TNIK|PHLDB2|NCK1|CLOCK|DMTN|PIK3CB	65928	58950|59091|59322|59166|59550|59583|59028|59907|59952|60060|59016|60162|60126|60003|59010|60108|59868|60666|60753|59406|59181|59517|59685|60906|60924|60669|59100|60321|60453|59379	1.14E-6	GO:0080134	0.36382721639824067
192	11	Monarch Phenotype	Immunodeficiency	2.3E-4	PRKDC|POT1|PNP|CD3E|FCGR3A|CARD11|HFE|XRCC4|IRAK4|ACD|IKBKG	65928	59016|60108|60330|59721|59706|59331|59436|59022|60933|60531|59160	9.59E-7	HP:0002721	0.36382721639824067
2084	39	GO Molecular Function	Enzyme binding	2.7E-4	PPP1R15A|AURKA|PLCG1|RIPK1|SLC12A2|ACE|HSP90B1|NOD2|PRKDC|MCM9|LILRB1|PSEN1|SKAP1|ERCC6|POT1|CD3E|SHOC2|RAP1A|FLNA|PRKACB|PAXX|SYK|HDAC6|LILRB2|TDG|MAP2K7|CBS|NCK1|IRF5|CCNE2|CRADD|KCTD13|MAP2K6|IRAK4|ACD|IKBKG|DOCK1|FEZ1|BCL10	65928	59091|59172|59322|59166|59583|59952|60054|60060|59016|59577|60162|60246|59343|59010|60108|59721|59094|60369|60666|59475|59004|59406|59181|59415|60837|59517|60156|59100|60969|59175|59505|59127|59511|60933|60531|59160|60954|60939|60771	9.97E-7	GO:0019899	0.3568636235841013
498	17	Monarch Phenotype	Anemia	2.7E-4	UROD|RIPK1|ZAP70|ERCC8|G6PC3|NOD2|SF3B1|EPB41|ERCC6|PNP|LIPT1|PCCB|XRCC4|SLC37A4|RECQL4|ACD|BCL10	65928	59433|59166|59400|59028|59802|60060|59592|59640|59010|60330|59886|60804|59022|59811|60726|60531|60771	1.22E-6	HP:0001903	0.3568636235841013
2546	44	Monarch Phenotype	Abnormal nervous system morphology	2.9E-4	ERCC1|PPP2R3C|GINS1|SLC12A2|ZAP70|ERCC8|PMS2|G6PC3|DLAT|CD96|KCNMA1|ACE|NOD2|PRKDC|ATRIP|PSEN1|IMPDH1|MLH3|ERCC6|REV3L|PNP|SHOC2|FLNA|MAP3K20|HDAC6|LIPT1|PSPH|CBS|TNIK|LAMA2|PCCB|FXN|XRCC4|CRADD|PIK3C2G|KCTD13|RECQL4|ACD|IKBKG|B2M|HMBS|PC|AMPD2|BTD	65928	58950|59550|59574|59583|59400|59028|58986|59802|59880|59907|59922|59952|60060|59016|60126|60246|60024|58980|59010|58953|60330|59094|60666|60753|59181|59886|60414|60156|60924|60900|60804|59760|59022|59505|59325|59127|60726|60531|59160|59697|59442|59805|60444|61086	1.4E-6	HP:0012639	0.3537602002101044
87	7	KEGG Pathways	PD-L1 expression and PD-1 checkpoint pathway in cancer	3.0E-4	PLCG1|ZAP70|EML4|CD3E|MAP2K6|IKBKG|PIK3CB	65928	59322|59400|59385|59721|59511|59160|59379	1.24E-5	hsa05235	0.35228787452803373
33	5	KEGG Pathways	Base excision repair	3.2E-4	POLL|TDG|SMUG1|POLD2|MUTYH	65928	60120|60837|60681|60555|59778	1.41E-5	hsa03410	0.34948500216800943
90	7	KEGG Pathways	Fc gamma R-mediated phagocytosis	3.2E-4	PLCG1|PIP5K1B|FCGR3A|SYK|PLA2G4C|DOCK1|PIK3CB	65928	59322|59337|59706|59406|59361|60954|59379	1.52E-5	hsa04666	0.34948500216800943
126	8	KEGG Pathways	Dopaminergic synapse	3.2E-4	PPP1R1B|PPP2R3C|CREB5|PRKACB|PPP2R3B|PPP2R2D|CALML4|CLOCK	65928	59472|59550|59754|59475|60828|59553|59391|60321	1.5E-5	hsa04728	0.34948500216800943
297	13	Monarch Phenotype	Hyperpigmentation of the skin	3.6E-4	ERCC1|UROD|SLC12A2|ERCC8|PMS2|NOD2|ERCC6|REV3L|SHOC2|HFE|RECQL4|ACD|IKBKG	65928	58950|59433|59583|59028|58986|60060|59010|58953|59094|59436|60726|60531|59160	1.76E-6	HP:0000953	0.3443697499232713
94	8	GO Biological Process	Negative regulation of protein binding	3.7E-4	AURKA|EPB41L5|ACE|TDG|NFATC4|DISC1|HFE|B2M	65928	59172|59637|59952|60837|60912|60882|59436|59697	1.97E-6	GO:0032091	0.3431798275933005
94	7	KEGG Pathways	Phosphatidylinositol signaling system	3.7E-4	PLCG1|PIP5K1B|INPP1|DGKZ|CALML4|PIK3C2G|PIK3CB	65928	59322|59337|59367|59355|59391|59325|59379	1.98E-5	hsa04070	0.3431798275933005
65	6	KEGG Pathways	Fc epsilon RI signaling pathway	4.5E-4	PLCG1|SYK|MAP2K7|MAP2K6|PLA2G4C|PIK3CB	65928	59322|59406|59517|59511|59361|59379	2.57E-5	hsa04664	0.33467874862246566
183	9	KEGG Pathways	Viral carcinogenesis	5.1E-4	GTF2H2|HDAC11|CREB5|PRKACB|SYK|HDAC6|CCNE2|IKBKG|PIK3CB	65928	58998|60000|59754|59475|59406|59181|59175|59160|59379	3.04E-5	hsa05203	0.3292429823902064
309	13	Monarch Phenotype	Diarrhea	5.1E-4	RIPK1|GINS1|ZAP70|ERCC8|SCNN1B|ERCC6|NR3C2|CD3E|HFE|SLC37A4|RECQL4|HMBS|BTD	65928	59166|59574|59400|59028|60459|59010|59958|59721|59436|59811|60726|59442|61086	2.68E-6	HP:0002014	0.3292429823902064
2355	41	GO Biological Process	Response to external stimulus	5.2E-4	ERCC1|RIPK3|SLC12A2|GAB1|ZAP70|CD96|LY96|ACE|NOD2|PRKDC|LILRB1|OAS2|ATF3|SCNN1B|ERCC6|FCGR3A|SYK|LILRB2|PSPH|MAP2K7|EPHB1|CBS|SLC8A1|NLRX1|LAMA2|NCK1|HFE|IRF5|PDK2|CRADD|NR4A1|PIK3C2G|STRA6|SLC37A4|IRAK4|IKBKG|TLR5|FEZ1|B2M|BCL10|PIK3CB	65928	58950|59157|59583|59349|59400|59907|59913|59952|60060|59016|60162|60069|59106|60459|59010|59706|59406|59415|60414|59517|59685|60156|60699|60906|60900|59100|59436|60969|59892|59505|60423|59325|60978|59811|60933|59160|59916|60939|59697|60771|59379	3.02E-6	GO:0009605	0.3283996656365201
22	5	GO Molecular Function	DNA damage sensor activity	5.5E-4	PMS2|SIRT6|MLH3|RAD51B|XRCC3	65928	58986|60003|58980|60732|58992	2.44E-6	GO:0140612	0.32596373105057563
995	24	Monarch Phenotype	Visual impairment	5.7E-4	ERCC1|UROD|SLC12A2|ERCC8|PMS2|DLAT|RP9|NOD2|PRKDC|IMPDH1|MLH3|ERCC6|REV3L|FLNA|CBS|TNIK|FXN|XRCC4|CRADD|IDH3B|IKBKG|BCL10|AMPD2|BTD	65928	58950|59433|59583|59028|58986|59880|60021|60060|59016|60024|58980|59010|58953|60666|60156|60924|59760|59022|59505|59616|59160|60771|60444|61086	3.08E-6	HP:0000505	0.3244125144327509
736	20	GO Biological Process	Protein phosphorylation	6.4E-4	RIPK3|AURKA|RIPK1|ZAP70|NOD2|PRKDC|CAMK2G|PXK|CD3E|TAF5|PRKACB|MAP3K20|SYK|MAP2K7|EPHB1|TNIK|PDK2|MAP2K6|PAK4|IRAK4	65928	59157|59172|59166|59400|60060|59016|60192|59925|59721|59868|59475|60753|59406|59517|59685|60924|59892|59511|60960|60933	4.06E-6	GO:0006468	0.3193820026016113
2040	37	GO Biological Process	Cell surface receptor signaling pathway	6.6E-4	PLCG1|LILRB3|RIPK1|GAB1|NGEF|ZAP70|LY96|LILRB1|PSEN1|SKAP1|OAS2|CD3E|FCGR3A|SHOC2|RAP1A|FLNA|HLA-DQB1|SYK|TNFRSF25|LILRB2|TGFB1I1|MAP2K7|EPHB1|NFATC4|TNIK|DISC1|NCK1|HFE|IRF5|PDK2|CRADD|IRAK4|IKBKG|DOCK1|THEMIS|BCL10|PIK3CB	65928	59322|59412|59166|59349|59682|59400|59913|60162|60246|59343|60069|59721|59706|59094|60369|60666|59691|59406|59499|59415|60846|59517|59685|60912|60924|60882|59100|59436|60969|59892|59505|60933|59160|60954|59373|60771|59379	4.2E-6	GO:0007166	0.31804560644581314
349	12	KEGG Pathways	PI3K-Akt signaling pathway	6.9E-4	PPP2R3C|G6PC3|HSP90B1|CREB5|SYK|PPP2R3B|PPP2R2D|LAMA2|CCNE2|NR4A1|IKBKG|PIK3CB	65928	59550|59802|60054|59754|59406|60828|59553|60900|59175|60423|59160|59379	4.5E-5	hsa04151	0.3161150909262745
47	6	GO Biological Process	Production of molecular mediator of immune response	7.0E-4	ERCC1|PMS2|NOD2|PRKDC|POLL|XRCC4	65928	58950|58986|60060|59016|60120|59022	4.65E-6	GO:0002440	0.3154901959985743
749	20	GO Biological Process	Immune system development	7.7E-4	ERCC1|RIPK3|PPP2R3C|ZAP70|PMS2|ACE|PRKDC|LILRB1|PSEN1|CD3E|FLNA|POLL|SYK|CARD11|XRCC4|DMTN|SLC37A4|DOCK1|THEMIS|B2M	65928	58950|59157|59550|59400|58986|59952|59016|60162|60246|59721|60666|60120|59406|59331|59022|60453|59811|60954|59373|59697	5.23E-6	GO:0002520	0.31135092748275184
47	6	Monarch Phenotype	Hepatocellular carcinoma	8.1E-4	UROD|PMS2|MLH3|HFE|SLC37A4|HMBS	65928	59433|58986|58980|59436|59811|59442	4.65E-6	HP:0001402	0.30915149811213505
951	23	COMPARTMENTS	Chromosome	8.6E-4	ERCC1|GINS1|HDAC11|PRKDC|ATRIP|PSEN1|SF3B1|SIRT6|MLH3|ERCC6|POT1|TAF5|FLNA|POLL|PAXX|HDAC6|RAD51B|XRCC4|CLOCK|XRCC3|POLD2|RECQL4|ACD	65928	58950|59574|60000|59016|60126|60246|59592|60003|58980|59010|60108|59868|60666|60120|59004|59181|60732|59022|60321|58992|60555|60726|60531	4.85E-6	GOCC:0005694	0.3065501548756432
3321	51	COMPARTMENTS	Non-membrane-bounded organelle	8.6E-4	ERCC1|AURKA|PPP2R3C|GINS1|PMS2|ACE|WDR90|HDAC11|NOD2|PRKDC|EML4|ATRIP|PSEN1|SF3B1|SIRT6|ATF3|EPB41|MLH3|ERCC6|PXK|RASSF1|POT1|TAF5|FLNA|POLL|PRKACB|PAXX|HDAC6|TGFB1I1|RASSF7|DYSF|TNIK|DISC1|PHLDB2|POC5|NCK1|RAD51B|XRCC4|SMUG1|CLOCK|DMTN|XRCC3|TLN2|PLA2G4C|POLD2|RECQL4|ACD|IKBKG|TLR5|FEZ1|BCL10	65928	58950|59172|59550|59574|58986|59952|59973|60000|60060|59016|59385|60126|60246|59592|60003|59106|59640|58980|59010|59925|60297|60108|59868|60666|60120|59475|59004|59181|60846|60525|60792|60924|60882|60669|59979|59100|60732|59022|60681|60321|60453|58992|60363|59361|60555|60726|60531|59160|59916|60939|60771	4.92E-6	GOCC:0043228	0.3065501548756432
46	5	KEGG Pathways	Nucleotide excision repair	8.9E-4	ERCC1|ERCC8|GTF2H2|ERCC6|POLD2	65928	58950|59028|58998|59010|60555	6.06E-5	hsa03420	0.30506099933550873
693	19	GO Biological Process	Cell activation	9.1E-4	ERCC1|RIPK3|ZAP70|PRKDC|LILRB1|PSEN1|SCNN1B|CD3E|FCGR3A|FLNA|SYK|CARD11|EPHB1|DYSF|DGKZ|NCK1|THEMIS|B2M|PIK3CB	65928	58950|59157|59400|59016|60162|60246|60459|59721|59706|60666|59406|59331|59685|60792|59355|59100|59373|59697|59379	6.37E-6	GO:0001775	0.30409586076789064
1820	33	UniProt Keywords	Transferase	9.7E-4	RIPK3|AURKA|ELP3|RIPK1|ILVBL|ZAP70|PIP5K1B|DLAT|PRKDC|SIRT6|OAS2|REV3L|PNP|POLL|PRKACB|MAP3K20|SYK|LIPT1|QPRT|MAP2K7|EPHB1|TNIK|DGKZ|PDK2|CLOCK|NNMT|PIK3C2G|MAP2K6|PAK4|IRAK4|HMBS|SCLY|PIK3CB	65928	59157|59172|59481|59166|59601|59400|59337|59880|59016|60003|60069|58953|60330|60120|59475|60753|59406|59886|60852|59517|59685|60924|59355|59892|60321|60336|59325|59511|60960|60933|59442|60984|59379	1.58E-5	KW-0808	0.3013228265733755
168	9	UniProt Keywords	Adaptive immunity	9.7E-4	LILRB3|ZAP70|LILRB1|SKAP1|CD3E|HLA-DQB1|SYK|LILRB2|THEMIS	65928	59412|59400|60162|59343|59721|59691|59406|59415|59373	1.6E-5	KW-1064	0.3013228265733755
158	8	KEGG Pathways	Hepatitis B	9.8E-4	CREB5|MAP2K7|NFATC4|CCNE2|MAP2K6|IRAK4|IKBKG|PIK3CB	65928	59754|59517|60912|59175|59511|60933|59160|59379	6.97E-5	hsa05161	0.3008773924307505
903	22	GO Biological Process	Cell migration	0.001	PLCG1|CORO7|ELP3|SLC12A2|GAB1|EPB41L5|ZAP70|PSEN1|FLNA|SYK|EPHB1|DISC1|DGKZ|NCK1|NR4A1|PIK3C2G|KCTD13|PAK4|SLC37A4|IRAK4|DOCK1|PIK3CB	65928	59322|59115|59481|59583|59349|59637|59400|60246|60666|59406|59685|60882|59355|59100|60423|59325|59127|60960|59811|60933|60954|59379	7.12E-6	GO:0016477	0.3
81	6	KEGG Pathways	ErbB signaling pathway	0.0011	PLCG1|GAB1|MAP2K7|NCK1|PAK4|PIK3CB	65928	59322|59349|59517|59100|60960|59379	8.13E-5	hsa04012	0.2958607314841775
210	9	KEGG Pathways	Human T-cell leukemia virus 1 infection	0.0011	CREB5|CD3E|PRKACB|NFATC4|CCNE2|TLN2|IKBKG|B2M|PIK3CB	65928	59754|59721|59475|60912|59175|60363|59160|59697|59379	8.43E-5	hsa05166	0.2958607314841775
340	13	Monarch Phenotype	Abnormal vascular physiology	0.0011	G6PC3|KCNMA1|NOD2|SCNN1B|FLNA|LIPT1|CBS|LAMA2|HFE|PIK3C2G|KCTD13|SLC37A4|IKBKG	65928	59802|59922|60060|60459|60666|59886|60156|60900|59436|59325|59127|59811|59160	7.26E-6	HP:0030163	0.2958607314841775
1261	27	GO Molecular Function	Protein-containing complex binding	0.0012	ERCC1|RIPK3|CORO7|RIPK1|ERCC8|NOD2|MCM9|LILRB1|SIRT6|EPB41|ERCC6|CD3E|FCGR3A|RAP1A|FLNA|HLA-DQB1|SYK|HDAC6|LILRB2|EPHB1|DISC1|DMTN|TLN2|ACD|B2M|BCL10|MUTYH	65928	58950|59157|59115|59166|59028|60060|59577|60162|60003|59640|59010|59721|59706|60369|60666|59691|59406|59181|59415|59685|60882|60453|60363|60531|59697|60771|59778	6.15E-6	GO:0044877	0.29208187539523756
122	7	KEGG Pathways	Platelet activation	0.0012	PTGS1|RAP1A|PRKACB|SYK|TLN2|PLA2G4C|PIK3CB	65928	60615|60369|59475|59406|60363|59361|59379	9.52E-5	hsa04611	0.29208187539523756
14	4	GO Cellular Component	T cell receptor complex	0.0013	ZAP70|SKAP1|CD3E|SYK	65928	59400|59343|59721|59406	1.22E-5	GO:0042101	0.2886056647693163
6033	77	GO Molecular Function	Ion binding	0.0013	RIPK3|AURKA|PLCG1|ELP3|RIPK1|PPP2R3C|ILVBL|ZAP70|PIP5K1B|PMS2|GTF2H2|KCNMA1|ACE|RP9|HSP90B1|NOD2|PRKDC|MCM9|CAMK2G|RARB|SIRT6|SNRNP48|SDSL|OAS2|IMPDH1|MLH3|ERCC6|PXK|RASSF1|CREB5|NR3C2|REV3L|PNP|PTGS1|RAP1A|POLL|PRKACB|RAD54L|MAP3K20|SYK|HDAC6|PPP2R3B|INPP1|TDG|TGFB1I1|PSPH|AMPD3|ADHFE1|MAP2K7|EPHB1|CBS|SLC8A1|DYSF|NLRX1|TNIK|DGKZ|PCCB|CALML4|FXN|RAD51B|PDK2|EPHX2|NR4A1|ZNF567|PIK3C2G|XRCC3|MAP2K…	65928	59157|59172|59322|59481|59166|59550|59601|59400|59337|58986|58998|59922|59952|60021|60054|60060|59016|59577|60192|60294|60003|60315|59604|60069|60024|58980|59010|59925|60297|59754|59958|58953|60330|60615|60369|60120|59475|60720|60753|59406|59181|60828|59367|60837|60846|60414|60438|59610|59517|59685|60156|60699|60792|60906|60924|59355|60804|59391|59760|60732|59892|60432|60423|60756|59325|58992|595…	7.06E-6	GO:0043167	0.2886056647693163
675	21	DISEASES	Immune system disease	0.0013	RIPK3|RIPK1|ZAP70|PMS2|DLAT|ACE|NOD2|PRKDC|EML4|PXK|PNP|FCGR3A|HLA-DQB1|TNFRSF25|CARD11|IRF5|XRCC4|IKBKG|TLR5|B2M|BCL10	65928	59157|59166|59400|58986|59880|59952|60060|59016|59385|59925|60330|59706|59691|59499|59331|60969|59022|59160|59916|59697|60771	2.76E-7	DOID:2914	0.2886056647693163
6291	83	DISEASES	Disease	0.0013	ERCC1|RIPK3|AURKA|LILRB3|UROD|PPP1R1B|ELP3|RIPK1|PPP2R3C|SLC12A2|GAB1|ZAP70|ERCC8|PMS2|G6PC3|GTF2H2|DLAT|CD96|KCNMA1|ACE|WDR90|RP9|NOD2|PRKDC|EML4|ATRIP|PSEN1|RARB|SIRT6|SDSL|OAS2|IMPDH1|EPB41|SCNN1B|MLH3|ERCC6|PXK|RASSF1|POT1|NR3C2|REV3L|PNP|FCGR3A|SHOC2|FLNA|POLL|PRKACB|HLA-DQB1|MAP3K20|TNFRSF25|LIPT1|PSPH|ELP4|CARD11|CBS|DYSF|LAMA2|DISC1|POC5|HFE|IRF5|PCCB|CALML4|FXN|XRCC4|CLOCK|EPHX2|CRADD|XR…	65928	58950|59157|59172|59412|59433|59472|59481|59166|59550|59583|59349|59400|59028|58986|59802|58998|59880|59907|59922|59952|59973|60021|60060|59016|59385|60126|60246|60294|60003|59604|60069|60024|59640|60459|58980|59010|59925|60297|60108|59958|58953|60330|59706|59094|60666|60120|59475|59691|60753|59499|59886|60414|59484|59331|60156|60792|60900|60882|59979|59436|60969|60804|59391|59760|59022|60321|604…	4.37E-7	DOID:4	0.2886056647693163
134	9	STRING Clusters	Carbon metabolism, and Pyruvate metabolism	0.0013	ILVBL|G6PC3|DLAT|SDSL|PSPH|PDK2|SLC37A4|IDH3B|PC	65928	59601|59802|59880|59604|60414|59892|59811|59616|59805	2.82E-6	CL:8463	0.2886056647693163
120	8	GO Biological Process	Regulation of cytokine production involved in immune response	0.0014	CD96|NOD2|LILRB1|SYK|NLRX1|HFE|B2M|BCL10	65928	59907|60060|60162|59406|60906|59436|59697|60771	1.08E-5	GO:0002718	0.2853871964321762
702	19	GO Molecular Function	Protein kinase binding	0.0014	PPP1R15A|AURKA|PLCG1|SLC12A2|ACE|NOD2|SKAP1|CD3E|FLNA|SYK|TDG|MAP2K7|NCK1|IRF5|CCNE2|MAP2K6|IRAK4|FEZ1|BCL10	65928	59091|59172|59322|59583|59952|60060|59343|59721|60666|59406|60837|59517|59100|60969|59175|59511|60933|60939|60771	7.61E-6	GO:0019901	0.2853871964321762
758	20	Reactome Pathways	Adaptive Immune System	0.0014	KLHL20|PLCG1|LILRB3|ZAP70|CD96|LY96|LILRB1|CD3E|FCGR3A|RAP1A|PRKACB|HLA-DQB1|SYK|LILRB2|CARD11|NCK1|IKBKG|B2M|BCL10|PIK3CB	65928	59112|59322|59412|59400|59907|59913|60162|59721|59706|60369|59475|59691|59406|59415|59331|59100|59160|59697|60771|59379	6.22E-6	HSA-1280218	0.2853871964321762
149	9	Reactome Pathways	DNA Double-Strand Break Repair	0.0014	ERCC1|PRKDC|ATRIP|SIRT6|POLL|RAD51B|XRCC4|XRCC3|POLD2	65928	58950|59016|60126|60003|60120|60732|59022|58992|60555	6.39E-6	HSA-5693532	0.2853871964321762
1373	28	Monarch Phenotype	Disease	0.0015	UROD|RIPK1|ERCC8|PMS2|CD96|KCNMA1|CAMK2G|RARB|SKAP1|EPB41|ERCC6|FLNA|HLA-DQB1|MAP3K20|PSPH|ELP4|AMPD3|EPHB1|CBS|LAMA2|PHLDB2|IRF5|RAD51B|XRCC4|MAP2K6|DOCK1|PC|BTD	65928	59433|59166|59028|58986|59907|59922|60192|60294|59343|59640|59010|60666|59691|60753|60414|59484|60438|59685|60156|60900|60669|60969|60732|59022|59511|60954|59805|61086	9.88E-6	EFO:0000408	0.28239087409443187
5378	71	TISSUES	Viscus	0.0016	AURKA|PPP1R1B|RIPK1|SLC12A2|ERCC8|CREM|PMS2|DLAT|LY96|KCNMA1|ACE|HDAC11|HSP90B1|NOD2|PRKDC|AHCYL2|CAMK2G|EML4|ATRIP|PSEN1|SF3B1|SIRT6|OAS2|IMPDH1|EPB41|SCNN1B|ERCC6|NR3C2|PNP|DCAF6|FLNA|PRKACB|MAP3K20|HDAC6|ALDH1B1|LILRB2|TDG|TGFB1I1|QPRT|PSPH|ADHFE1|CBS|DYSF|NLRX1|NFATC4|LAMA2|NCK1|HFE|IRF5|PCCB|CALML4|PDK2|SMUG1|CLOCK|DMTN|EPHX2|CRADD|NNMT|TLN2|MAP2K6|PAK4|IRAK4|ACD|IKBKG|B2M|BCL10|HMBS|PC|AMPD…	65928	59172|59472|59166|59583|59028|59751|58986|59880|59913|59922|59952|60000|60054|60060|59016|60150|60192|59385|60126|60246|59592|60003|60069|60024|59640|60459|59010|59958|60330|59733|60666|59475|60753|59181|60798|59415|60837|60846|60852|60414|59610|60156|60792|60906|60912|60900|59100|59436|60969|60804|59391|59892|60681|60321|60453|60432|59505|60336|60363|59511|60960|60933|60531|59160|59697|60771|594…	6.66E-6	BTO:0001491	0.2795880017344075
300	12	Monarch Phenotype	Sparse hair	0.0016	ERCC1|PPP2R3C|ERCC8|ATRIP|ERCC6|SHOC2|FLNA|CBS|XRCC4|RECQL4|ACD|IKBKG	65928	58950|59550|59028|60126|59010|59094|60666|60156|59022|60726|60531|59160	1.07E-5	HP:0008070	0.2795880017344075
1470	29	Monarch Phenotype	Abnormality of the nose	0.0017	ERCC1|PPP2R3C|SLC12A2|ZAP70|ERCC8|G6PC3|CD96|KCNMA1|RP9|PRKDC|ATRIP|RARB|IMPDH1|SCNN1B|ERCC6|REV3L|PNP|FCGR3A|SHOC2|FLNA|PRKACB|HDAC6|HFE|XRCC4|STRA6|SLC37A4|RECQL4|IDH3B|B2M	65928	58950|59550|59583|59400|59028|59802|59907|59922|60021|59016|60126|60294|60024|60459|59010|58953|60330|59706|59094|60666|59475|59181|59436|59022|60978|59811|60726|59616|59697	1.24E-5	HP:0000366	0.2769551078621726
356	13	Monarch Phenotype	Limitation of joint mobility	0.0017	ERCC1|PPP2R3C|ERCC8|CD96|NOD2|ERCC6|FLNA|MAP3K20|CBS|DYSF|LAMA2|HFE|RECQL4	65928	58950|59550|59028|59907|60060|59010|60666|60753|60156|60792|60900|59436|60726	1.17E-5	HP:0001376	0.2769551078621726
162	9	Monarch Phenotype	Scarring	0.0017	ERCC1|UROD|ERCC8|RP9|IMPDH1|ERCC6|FLNA|IDH3B|IKBKG	65928	58950|59433|59028|60021|60024|59010|60666|59616|59160	1.21E-5	HP:0100699	0.2769551078621726
1057	24	TISSUES	Cardiovascular system	0.0018	RIPK3|PLCG1|RIPK1|CREM|KCNMA1|ACE|HSP90B1|ATRIP|SIRT6|NR3C2|DCAF6|FLNA|MAP3K20|TNFRSF25|AMPD3|MAP2K7|SLC8A1|LAMA2|PHLDB2|DGKZ|NR4A1|IDH3B|B2M|BTD	65928	59157|59322|59166|59751|59922|59952|60054|60126|60003|59958|59733|60666|60753|59499|60438|59517|60699|60900|60669|59355|60423|59616|59697|61086	8.38E-6	BTO:0000088	0.2744727494896694
286	10	KEGG Pathways	MAPK signaling pathway	0.0019	RAP1A|FLNA|PRKACB|MAP3K20|MAP2K7|NR4A1|MAP2K6|PLA2G4C|IRAK4|IKBKG	65928	60369|60666|59475|60753|59517|60423|59511|59361|60933|59160	1.7E-4	hsa04010	0.27212463990471714
31	5	Reactome Pathways	Generation of second messenger molecules	0.002	PLCG1|ZAP70|CD3E|HLA-DQB1|NCK1	65928	59322|59400|59721|59691|59100	1.07E-5	HSA-202433	0.2698970004336019
15	4	Monarch Phenotype	Astrocytosis	0.002	ERCC8|PSEN1|ERCC6|LAMA2	65928	59028|60246|59010|60900	1.54E-5	HP:0002446	0.2698970004336019
2144	37	GO Molecular Function	Identical protein binding	0.0021	RIPK3|RIPK1|DLAT|KCNMA1|LILRB1|CAMK2G|SIRT6|SDSL|ATF3|IMPDH1|RASSF1|CREB5|PNP|CD3E|TAF5|FLNA|PAXX|LILRB2|TDG|QPRT|PSPH|CBS|DISC1|IRF5|PDK2|XRCC4|SMUG1|EPHX2|NR4A1|KCTD13|MAP2K6|IKBKG|B2M|BCL10|PC|SCLY|AMPD2	65928	59157|59166|59880|59922|60162|60192|60003|59604|59106|60024|60297|59754|60330|59721|59868|60666|59004|59415|60837|60852|60414|60156|60882|60969|59892|59022|60681|60432|60423|59127|59511|59160|59697|60771|59805|60984|60444	1.28E-5	GO:0042802	0.26777807052660807
129	8	GO Biological Process	Telomere organization	0.0022	ERCC1|PRKDC|SIRT6|POT1|CCNE2|XRCC3|RECQL4|ACD	65928	58950|59016|60003|60108|59175|58992|60726|60531	1.77E-5	GO:0032200	0.2657577319177794
97	6	KEGG Pathways	Chagas disease	0.0022	ACE|CD3E|PPP2R2D|IRAK4|IKBKG|PIK3CB	65928	59952|59721|59553|60933|59160|59379	2.1E-4	hsa05142	0.2657577319177794
33	4	KEGG Pathways	Nicotinate and nicotinamide metabolism	0.0023	SIRT6|PNP|QPRT|NNMT	65928	60003|60330|60852|60336	2.3E-4	hsa00760	0.2638272163982407
2365	39	GO Biological Process	Regulation of cellular component organization	0.0024	ERCC1|PPP1R15A|AURKA|EPB41L5|NGEF|EAF2|GTF2H2|ACE|LILRB1|CAMK2G|PSEN1|SIRT6|SKAP1|RASSF1|POT1|RAP1A|FLNA|SYK|HDAC6|LILRB2|RASSF7|MAP2K7|EPHB1|NFATC4|TNIK|LAMA2|DISC1|PHLDB2|NCK1|HFE|FXN|XRCC4|DMTN|XRCC3|PAK4|ACD|FEZ1|B2M|PIK3CB	65928	58950|59091|59172|59637|59682|59847|58998|59952|60162|60192|60246|60003|59343|60297|60108|60369|60666|59406|59181|59415|60525|59517|59685|60912|60924|60900|60882|60669|59100|59436|59760|59022|60453|58992|60960|60531|60939|59697|59379	1.98E-5	GO:0051128	0.2619788758288394
101	6	KEGG Pathways	C-type lectin receptor signaling pathway	0.0024	SYK|NFATC4|CALML4|IKBKG|BCL10|PIK3CB	65928	59406|60912|59391|59160|60771|59379	2.5E-4	hsa04625	0.2619788758288394
63	6	GO Biological Process	T cell differentiation in thymus	0.0026	RIPK3|ZAP70|PRKDC|CD3E|CARD11|B2M	65928	59157|59400|59016|59721|59331|59697	2.18E-5	GO:0033077	0.2585026652029182
195	8	KEGG Pathways	Focal adhesion	0.0026	PIP5K1B|RAP1A|FLNA|LAMA2|TLN2|PAK4|DOCK1|PIK3CB	65928	59337|60369|60666|60900|60363|60960|60954|59379	2.8E-4	hsa04510	0.2585026652029182
4209	58	GO Biological Process	Multicellular organism development	0.0028	ERCC1|RIPK3|AURKA|ELP3|PPP2R3C|GINS1|GAB1|EPB41L5|NGEF|ZAP70|PMS2|EAF2|ACE|HDAC11|PRKDC|LILRB1|CAMK2G|PSEN1|RARB|SIRT6|ERCC6|CD3E|RAP1A|FLNA|POLL|PRKACB|MAP3K20|SYK|HDAC6|TGFB1I1|PSPH|CARD11|EPHB1|CBS|SLC8A1|NFATC4|TNIK|LAMA2|DISC1|FXN|RAD51B|XRCC4|DMTN|NR4A1|STRA6|MAP2K6|PAK4|SLC37A4|SEZ6L2|ACD|DOCK1|THEMIS|TLR5|FEZ1|B2M|BCL10|BTD|PIK3CB	65928	58950|59157|59172|59481|59550|59574|59349|59637|59682|59400|58986|59847|59952|60000|59016|60162|60192|60246|60294|60003|59010|59721|60369|60666|60120|59475|60753|59406|59181|60846|60414|59331|59685|60156|60699|60912|60924|60900|60882|59760|60732|59022|60453|60423|60978|59511|60960|59811|61062|60531|60954|59373|59916|60939|59697|60771|61086|59379	2.38E-5	GO:0007275	0.2552841968657781
68	5	KEGG Pathways	Non-small cell lung cancer	0.003	PLCG1|EML4|RARB|RASSF1|PIK3CB	65928	59322|59385|60294|60297|59379	3.4E-4	hsa05223	0.25228787452803375
913	21	GO Biological Process	Nucleobase-containing compound biosynthetic process	0.0031	PPP1R1B|GTF2H2|DLAT|IMPDH1|ERCC6|POT1|REV3L|PNP|TAF5|POLL|MED18|QPRT|ELP4|AMPD3|CARD11|NFATC4|NR4A1|NNMT|POLD2|ACD|AMPD2	65928	59472|58998|59880|60024|59010|60108|58953|60330|59868|60120|59862|60852|59484|60438|59331|60912|60423|60336|60555|60531|60444	2.7E-5	GO:0034654	0.25086383061657275
1294	26	Monarch Phenotype	Abnormality of connective tissue	0.0031	ERCC1|UROD|PPP2R3C|ERCC8|PMS2|CD96|RP9|NOD2|ATRIP|PSEN1|RARB|IMPDH1|MLH3|ERCC6|REV3L|SHOC2|FLNA|MAP3K20|CBS|DYSF|LAMA2|XRCC4|STRA6|RECQL4|IDH3B|IKBKG	65928	58950|59433|59550|59028|58986|59907|60021|60060|60126|60246|60294|60024|58980|59010|58953|59094|60666|60753|60156|60792|60900|59022|60978|60726|59616|59160	2.76E-5	HP:0003549	0.25086383061657275
333	12	GO Biological Process	Response to molecule of bacterial origin	0.0032	CD96|LY96|ACE|NOD2|LILRB1|LILRB2|MAP2K7|IRF5|NR4A1|TLR5|B2M|BCL10	65928	59907|59913|59952|60060|60162|59415|59517|60969|60423|59916|59697|60771	2.9E-5	GO:0002237	0.24948500216800942
1620	30	GO Biological Process	Cellular catabolic process	0.0032	KLHL20|AURKA|PLCG1|UROD|ILVBL|ERCC8|KLHL8|ACE|HSP90B1|NOD2|PSEN1|SDSL|OAS2|PNP|HDAC6|TDG|TGFB1I1|QPRT|AMPD3|ADHFE1|CBS|DISC1|PCCB|SMUG1|CLOCK|EPHX2|KCTD13|PLA2G4C|SCLY|PIK3CB	65928	59112|59172|59322|59433|59601|59028|59121|59952|60054|60060|60246|59604|60069|60330|59181|60837|60846|60852|60438|59610|60156|60882|60804|60681|60321|60432|59127|59361|60984|59379	2.82E-5	GO:0044248	0.24948500216800942
93	7	Reactome Pathways	MyD88 cascade initiated on plasma membrane	0.0033	NOD2|MAP2K7|NLRX1|MAP2K6|IRAK4|IKBKG|TLR5	65928	60060|59517|60906|59511|60933|59160|59916	1.86E-5	HSA-975871	0.24814860601221125
1152	24	Monarch Phenotype	Short stature	0.0036	ERCC1|PPP2R3C|GINS1|SLC12A2|ERCC8|CD96|MCM9|CAMK2G|ATRIP|RARB|SCNN1B|ERCC6|SHOC2|FLNA|PRKACB|HDAC6|PCCB|XRCC4|STRA6|SLC37A4|RECQL4|ACD|IKBKG|AMPD2	65928	58950|59550|59574|59583|59028|59907|59577|60192|60126|60294|60459|59010|59094|60666|59475|59181|60804|59022|60978|59811|60726|60531|59160|60444	3.32E-5	HP:0004322	0.24436974992327126
73	5	KEGG Pathways	Biosynthesis of amino acids	0.0038	SDSL|PSPH|CBS|IDH3B|PC	65928	59604|60414|60156|59616|59805	4.6E-4	hsa01230	0.242021640338319
187	9	GO Biological Process	Regulation of T cell proliferation	0.0039	RIPK3|ZAP70|LILRB1|PNP|CD3E|SYK|LILRB2|CARD11|NCK1	65928	59157|59400|60162|60330|59721|59406|59415|59331|59100	3.57E-5	GO:0042129	0.24089353929735008
342	12	Monarch Phenotype	Serum alanine aminotransferase measurement	0.0039	CREB5|PNP|MED18|MAP3K20|PSPH|DISC1|NCK1|HFE|RAD51B|DMTN|RECQL4|FEZ1	65928	59754|60330|59862|60753|60414|60882|59100|59436|60732|60453|60726|60939	3.72E-5	EFO:0004735	0.24089353929735008
586	16	GO Biological Process	Positive regulation of transferase activity	0.004	RIPK3|PPP2R3C|GINS1|ACE|NOD2|PSEN1|ERCC6|POT1|RAP1A|SYK|MAP2K7|EPHB1|DGKZ|MAP2K6|ACD|BCL10	65928	59157|59550|59574|59952|60060|60246|59010|60108|60369|59406|59517|59685|59355|59511|60531|60771	3.75E-5	GO:0051347	0.23979400086720376
105	7	GO Biological Process	DNA damage checkpoint signaling	0.0041	PRKDC|ATRIP|ERCC6|MAP3K20|DGKZ|CLOCK|CRADD	65928	59016|60126|59010|60753|59355|60321|59505	3.88E-5	GO:0000077	0.23872161432802647
42	5	GO Biological Process	Purine ribonucleoside monophosphate metabolic process	0.0042	IMPDH1|PNP|AMPD3|CARD11|AMPD2	65928	60024|60330|60438|59331|60444	4.06E-5	GO:0009167	0.23767507096020996
218	8	KEGG Pathways	Shigellosis	0.0044	PLCG1|RIPK1|TLN2|IKBKG|DOCK1|TLR5|BCL10|PIK3CB	65928	59322|59166|60363|59160|60954|59916|60771|59379	5.7E-4	hsa05131	0.23565473235138126
4304	58	Monarch Phenotype	Anthropometric measurement	0.0046	PLCG1|LILRB3|CORO7|ELP3|SLC12A2|GAB1|ZAP70|G6PC3|DLAT|KCNMA1|HDAC11|PRKDC|AHCYL2|EML4|RARB|SF3B1|SKAP1|SDSL|PXK|CREB5|NR3C2|RAP1A|TAF5|HLA-DQB1|ELP4|AMPD3|CARD11|MAP2K7|EPHB1|SLC8A1|DYSF|NFATC4|TNIK|PPP2R2D|LAMA2|DISC1|PHLDB2|POC5|NCK1|IRF5|PCCB|RAD51B|SMUG1|CLOCK|CRADD|PIK3C2G|TLN2|KCTD13|STRA6|MAP2K6|SEZ6L2|DOCK1|THEMIS|FEZ1|HMBS|PC|BTD|PIK3CB	65928	59322|59412|59115|59481|59583|59349|59400|59802|59880|59922|60000|59016|60150|59385|60294|59592|59343|59604|59925|59754|59958|60369|59868|59691|59484|60438|59331|59517|59685|60699|60792|60912|60924|59553|60900|60882|60669|59979|59100|60969|60804|60732|60681|60321|59505|59325|60363|59127|60978|59511|61062|60954|59373|60939|59442|59805|61086|59379	4.63E-5	EFO:0004302	0.23372421683184258
149	8	Monarch Phenotype	Abnormal lymphocyte morphology	0.0046	RIPK1|ZAP70|G6PC3|PNP|CD3E|FCGR3A|CARD11|XRCC4	65928	59166|59400|59802|60330|59721|59706|59331|59022	4.7E-5	HP:0004332	0.23372421683184258
1582	29	GO Biological Process	Regulation of cell differentiation	0.0047	AURKA|LILRB3|RIPK1|PPP2R3C|ZAP70|ACE|PRKDC|LILRB1|PSEN1|RARB|SIRT6|PNP|RAP1A|FLNA|SYK|HDAC6|LILRB2|TGFB1I1|CARD11|EPHB1|NFATC4|LAMA2|DISC1|PHLDB2|CLOCK|DMTN|DOCK1|FEZ1|B2M	65928	59172|59412|59166|59550|59400|59952|59016|60162|60246|60294|60003|60330|60369|60666|59406|59181|59415|60846|59331|59685|60912|60900|60882|60669|60321|60453|60954|60939|59697	4.69E-5	GO:0045595	0.23279021420642826
1839	32	Monarch Phenotype	Behavioral abnormality	0.0047	ERCC1|SLC12A2|ERCC8|PMS2|DLAT|KCNMA1|RP9|NOD2|PSEN1|IMPDH1|MLH3|ERCC6|CREB5|REV3L|PNP|SHOC2|MAP3K20|LIPT1|ELP4|CBS|DYSF|TNIK|LAMA2|HFE|PCCB|FXN|CRADD|IDH3B|IKBKG|DOCK1|HMBS|PC	65928	58950|59583|59028|58986|59880|59922|60021|60060|60246|60024|58980|59010|59754|58953|60330|59094|60753|59886|59484|60156|60792|60924|60900|59436|60804|59760|59505|59616|59160|60954|59442|59805	4.83E-5	HP:0000708	0.23279021420642826
44	5	Reactome Pathways	Base-Excision Repair, AP Site Formation	0.0048	POT1|TDG|SMUG1|ACD|MUTYH	65928	60108|60837|60681|60531|59778	4.99E-5	HSA-73929	0.23187587626244127
21	4	Reactome Pathways	IKK complex recruitment mediated by RIP1	0.0048	RIPK3|RIPK1|LY96|IKBKG	65928	59157|59166|59913|59160	4.83E-5	HSA-937041	0.23187587626244127
1426	27	Monarch Phenotype	Abnormality of the upper limb	0.005	ERCC1|PPP2R3C|SLC12A2|ERCC8|G6PC3|CD96|NOD2|PRKDC|CAMK2G|ATRIP|PSEN1|ERCC6|REV3L|SHOC2|FLNA|PRKACB|MAP3K20|HDAC6|CBS|DYSF|LAMA2|HFE|FXN|RECQL4|IKBKG|B2M|HMBS	65928	58950|59550|59583|59028|59802|59907|60060|59016|60192|60126|60246|59010|58953|59094|60666|59475|60753|59181|60156|60792|60900|59436|59760|60726|59160|59697|59442	5.21E-5	HP:0002817	0.23010299956639813
69	6	GO Molecular Function	Damaged DNA binding	0.0051	ERCC1|SIRT6|POT1|TDG|RECQL4|MUTYH	65928	58950|60003|60108|60837|60726|59778	3.51E-5	GO:0003684	0.22924298239020638
75	6	GO Biological Process	Stress-activated MAPK cascade	0.0052	NOD2|ERCC6|MAP3K20|MAP2K7|MAP2K6|IRAK4	65928	60060|59010|60753|59517|59511|60933	5.44E-5	GO:0051403	0.2283996656365201
75	6	Monarch Phenotype	Cutaneous photosensitivity	0.0052	ERCC1|UROD|ERCC8|ERCC6|HFE|RECQL4	65928	58950|59433|59028|59010|59436|60726	5.44E-5	HP:0000992	0.2283996656365201
173	7	KEGG Pathways	NOD-like receptor signaling pathway	0.0054	RIPK3|RIPK1|NOD2|OAS2|NLRX1|IRAK4|IKBKG	65928	59157|59166|60060|60069|60906|60933|59160	7.3E-4	hsa04621	0.22676062401770314
479	14	Monarch Phenotype	Inflammatory abnormality of the skin	0.0054	UROD|RIPK1|GINS1|ZAP70|NOD2|SCNN1B|CD3E|SHOC2|HLA-DQB1|CARD11|PCCB|RAD51B|IKBKG|BTD	65928	59433|59166|59574|59400|60060|60459|59721|59094|59691|59331|60804|60732|59160|61086	5.8E-5	HP:0011123	0.22676062401770314
1041	22	GO Biological Process	Apoptotic process	0.0056	PPP1R15A|RIPK3|AURKA|RIPK1|EAF2|PRKDC|PSEN1|RARB|ERCC6|CD3E|TNFRSF25|RASSF7|MAP2K7|NFATC4|PDK2|CRADD|NR4A1|MAP2K6|PAK4|IKBKG|DOCK1|BCL10	65928	59091|59157|59172|59166|59847|59016|60246|60294|59010|59721|59499|60525|59517|60912|59892|59505|60423|59511|60960|59160|60954|60771	5.95E-5	GO:0006915	0.22518119729937996
156	8	Monarch Phenotype	Neutropenia	0.0057	GINS1|G6PC3|SF3B1|PNP|PCCB|SLC37A4|IRAK4|RECQL4	65928	59574|59802|59592|60330|60804|59811|60933|60726	6.4E-5	HP:0001875	0.22441251443275084
202	9	Monarch Phenotype	Abnormal basal ganglia morphology	0.0057	ERCC1|SLC12A2|ERCC8|DLAT|ERCC6|LIPT1|TNIK|CRADD|PC	65928	58950|59583|59028|59880|59010|59886|60924|59505|59805	6.33E-5	HP:0002134	0.22441251443275084
176	7	KEGG Pathways	Axon guidance	0.0058	PLCG1|NGEF|EPHB1|NFATC4|NCK1|PAK4|PIK3CB	65928	59322|59682|59685|60912|59100|60960|59379	8.0E-4	hsa04360	0.22365720064370626
5825	73	TISSUES	Central nervous system	0.0062	ERCC1|PPP1R15A|KLHL20|RIPK3|PLCG1|PPP1R1B|ELP3|RIPK1|PPP2R3C|RBM42|GAB1|ILVBL|EPB41L5|NGEF|CREM|PIP5K1B|PMS2|KCNMA1|ACE|HDAC11|HSP90B1|PRKDC|MCM9|AHCYL2|CAMK2G|EML4|PSEN1|SF3B1|ATF3|IMPDH1|EPB41|PXK|RASSF1|PTGS1|SHOC2|RAP1A|FLNA|PRKACB|MAP3K20|HDAC6|TGFB1I1|ELP4|AMPD3|ADHFE1|EPHB1|CBS|SLC8A1|TNIK|PPP2R2D|LAMA2|DISC1|DGKZ|PCCB|PDK2|SMUG1|CLOCK|DMTN|NR4A1|TLN2|KCTD13|STRA6|PAK4|PLA2G4C|POLD2|SEZ6L2…	65928	58950|59091|59112|59157|59322|59472|59481|59166|59550|59589|59349|59601|59637|59682|59751|59337|58986|59922|59952|60000|60054|59016|59577|60150|60192|59385|60246|59592|59106|60024|59640|59925|60297|60615|59094|60369|60666|59475|60753|59181|60846|59484|60438|59610|59685|60156|60699|60924|59553|60900|60882|59355|60804|59892|60681|60321|60453|60423|60363|59127|60978|60960|59361|60555|61062|59616|593…	3.05E-5	BTO:0000227	0.2207608310501746
129	6	KEGG Pathways	Fluid shear stress and atherosclerosis	0.0063	HSP90B1|MAP2K7|CALML4|MAP2K6|IKBKG|PIK3CB	65928	60054|59517|59391|59511|59160|59379	8.8E-4	hsa05418	0.22006594505464183
691	17	GO Biological Process	Negative regulation of cellular component organization	0.0067	ERCC1|NGEF|ACE|LILRB1|PSEN1|POT1|FLNA|HDAC6|LILRB2|NFATC4|PHLDB2|NCK1|FXN|DMTN|ACD|FEZ1|B2M	65928	58950|59682|59952|60162|60246|60108|60666|59181|59415|60912|60669|59100|59760|60453|60531|60939|59697	7.52E-5	GO:0051129	0.21739251972991736
8	3	Reactome Pathways	Defects in biotin (Btn) metabolism	0.0067	PCCB|PC|BTD	65928	60804|59805|61086	8.53E-5	HSA-3323169	0.21739251972991736
87	5	KEGG Pathways	GnRH signaling pathway	0.0068	PRKACB|MAP2K7|CALML4|MAP2K6|PLA2G4C	65928	59475|59517|59391|59511|59361	9.7E-4	hsa04912	0.2167491087293764
2898	43	GO Biological Process	Macromolecule modification	0.007	PPP1R15A|KLHL20|RIPK3|AURKA|ELP3|RIPK1|ZAP70|ERCC8|KLHL8|HDAC11|NOD2|PRKDC|CAMK2G|PSEN1|SIRT6|PXK|CD3E|DCAF6|TAF5|FLNA|PRKACB|MAP3K20|SYK|HDAC6|PPP2R3B|TDG|LIPT1|ELP4|MAP2K7|EPHB1|KAT14|TNIK|NCK1|FXN|PDK2|SMUG1|CLOCK|KCTD13|MAP2K6|PAK4|IRAK4|HMBS|MUTYH	65928	59091|59112|59157|59172|59481|59166|59400|59028|59121|60000|60060|59016|60192|60246|60003|59925|59721|59733|59868|60666|59475|60753|59406|59181|60828|60837|59886|59484|59517|59685|60660|60924|59100|59760|59892|60681|60321|59127|59511|60960|60933|59442|59778	8.18E-5	GO:0043412	0.2154901959985743
700	17	GO Biological Process	Regulation of ion transport	0.0074	PLCG1|RIPK1|SLC12A2|KCNMA1|ACE|LILRB1|CAMK2G|PSEN1|EPB41|PXK|FLNA|SYK|LILRB2|SLC8A1|HFE|MAP2K6|B2M	65928	59322|59166|59583|59922|59952|60162|60192|60246|59640|59925|60666|59406|59415|60699|59436|59511|59697	8.76E-5	GO:0043269	0.21307682802690237
51	4	KEGG Pathways	Fanconi anemia pathway	0.0074	ERCC1|PMS2|ATRIP|REV3L	65928	58950|58986|60126|58953	0.0011	hsa03460	0.21307682802690237
706	17	Reactome Pathways	Cytokine Signaling in Immune system	0.0074	PLCG1|HSP90B1|NOD2|CAMK2G|OAS2|FLNA|HLA-DQB1|SYK|TNFRSF25|MAP2K7|NLRX1|IRF5|MAP2K6|IRAK4|IKBKG|B2M|PIK3CB	65928	59322|60054|60060|60192|60069|60666|59691|59406|59499|59517|60906|60969|59511|60933|59160|59697|59379	9.69E-5	HSA-1280215	0.21307682802690237
849	19	Monarch Phenotype	Abnormality of digestive system morphology	0.0077	UROD|RIPK1|PPP2R3C|SLC12A2|ZAP70|PMS2|CD96|RARB|MLH3|FLNA|CBS|HFE|STRA6|SLC37A4|RECQL4|B2M|BCL10|HMBS|MUTYH	65928	59433|59166|59550|59583|59400|58986|59907|60294|58980|60666|60156|59436|60978|59811|60726|59697|60771|59442|59778	9.55E-5	HP:0025033	0.2113509274827518
122	7	GO Biological Process	Regulation of cell-matrix adhesion	0.0079	EPB41L5|SKAP1|CD3E|DISC1|PHLDB2|DMTN|PIK3CB	65928	59637|59343|59721|60882|60669|60453|59379	9.52E-5	GO:0001952	0.21023729087095586
123	7	Monarch Phenotype	Azotemia	0.008	ERCC8|ERCC6|PNP|PCCB|SLC37A4|PC|BTD	65928	59028|59010|60330|60804|59811|59805|61086	1.0E-4	HP:0002157	0.20969100130080562
638	16	Monarch Phenotype	Abnormality of urine homeostasis	0.008	ERCC1|UROD|ZAP70|ERCC8|SCNN1B|ERCC6|NR3C2|PNP|CBS|HFE|PCCB|SLC37A4|HMBS|PC|BTD|MUTYH	65928	58950|59433|59400|59028|60459|59010|59958|60330|60156|59436|60804|59811|59442|59805|61086|59778	9.94E-5	HP:0003110	0.20969100130080562
23	3	KEGG Pathways	Mismatch repair	0.0081	PMS2|MLH3|POLD2	65928	58986|58980|60555	0.0012	hsa03430	0.20915149811213504
92	5	KEGG Pathways	Small cell lung cancer	0.0081	RARB|LAMA2|CCNE2|IKBKG|PIK3CB	65928	60294|60900|59175|59160|59379	0.0012	hsa05222	0.20915149811213504
7	3	COMPARTMENTS	DNA ligase IV complex	0.0082	PRKDC|PAXX|XRCC4	65928	59016|59004|59022	6.24E-5	GOCC:0032807	0.20861861476162832
892	20	COMPARTMENTS	Transferase complex	0.0082	KLHL20|RIPK1|ILVBL|ERCC8|KLHL8|GTF2H2|PRKDC|NR3C2|REV3L|DCAF6|TAF5|KAT14|FXN|XRCC4|CCNE2|PIK3C2G|KCTD13|POLD2|IKBKG|PIK3CB	65928	59112|59166|59601|59028|59121|58998|59016|59958|58953|59733|59868|60660|59760|59022|59175|59325|59127|60555|59160|59379	6.02E-5	GOCC:1990234	0.20861861476162832
323	11	GO Biological Process	Cellular metal ion homeostasis	0.0083	SLC12A2|KCNMA1|HSP90B1|PSEN1|SCNN1B|SLC8A1|DISC1|HFE|FXN|SLC37A4|PIK3CB	65928	59583|59922|60054|60246|60459|60699|60882|59436|59760|59811|59379	1.0E-4	GO:0006875	0.20809219076239263
444	13	GO Biological Process	Response to radiation	0.0085	ERCC1|PPP1R1B|ERCC8|GTF2H2|PRKDC|SIRT6|ERCC6|RAD54L|MAP3K20|MAP2K7|NFATC4|XRCC4|CLOCK	65928	58950|59472|59028|58998|59016|60003|59010|60720|60753|59517|60912|59022|60321	1.1E-4	GO:0009314	0.20705810742857073
169	8	Monarch Phenotype	Recurrent bacterial infections	0.0085	UROD|ZAP70|G6PC3|SCNN1B|PNP|SLC37A4|IRAK4|IKBKG	65928	59433|59400|59802|60459|60330|59811|60933|59160	1.1E-4	HP:0002718	0.20705810742857073
169	8	Monarch Phenotype	Decreased circulating antibody level	0.0085	RIPK1|ZAP70|CD3E|FLNA|CARD11|HFE|IKBKG|B2M	65928	59166|59400|59721|60666|59331|59436|59160|59697	1.1E-4	HP:0004313	0.20705810742857073
169	8	GO Biological Process	Calcium-mediated signaling	0.0086	PLCG1|ZAP70|CD3E|FCGR3A|SYK|SLC8A1|NFATC4|DMTN	65928	59322|59400|59721|59706|59406|60699|60912|60453	1.1E-4	GO:0019722	0.2065501548756432
446	13	GO Biological Process	Small molecule biosynthetic process	0.0087	ILVBL|G6PC3|SIRT6|SDSL|ATF3|PNP|PTGS1|SYK|PSPH|CBS|PCCB|SLC37A4|PC	65928	59601|59802|60003|59604|59106|60330|60615|59406|60414|60156|60804|59811|59805	1.1E-4	GO:0044283	0.20604807473813813
9	3	GO Biological Process	Positive regulation of gamma-delta T cell activation	0.0088	NOD2|LILRB1|SYK	65928	60060|60162|59406	1.1E-4	GO:0046645	0.20555173278498312
172	8	Monarch Phenotype	Abdominal pain	0.009	RIPK1|PMS2|EPB41|MLH3|FLNA|HFE|BCL10|HMBS	65928	59166|58986|59640|58980|60666|59436|60771|59442	1.2E-4	HP:0002027	0.2045757490560675
130	7	Reactome Pathways	Immunoregulatory interactions between a Lymphoid and a non-Lymphoid cell	0.0091	LILRB3|CD96|LILRB1|CD3E|FCGR3A|LILRB2|B2M	65928	59412|59907|60162|59721|59706|59415|59697	1.4E-4	HSA-198933	0.2040958607678906
29	4	Reactome Pathways	DAP12 signaling	0.0092	PLCG1|SYK|B2M|PIK3CB	65928	59322|59406|59697|59379	1.5E-4	HSA-2424491	0.2036212172654445
92	6	Reactome Pathways	Downstream TCR signaling	0.0095	CD3E|HLA-DQB1|CARD11|IKBKG|BCL10|PIK3CB	65928	59721|59691|59331|59160|60771|59379	1.6E-4	HSA-202424	0.20222763947111524
128	7	GO Biological Process	Meiosis I cell cycle process	0.0096	ERCC1|AURKA|MND1|MLH3|RAD54L|RAD51B|CCNE2	65928	58950|59172|59301|58980|60720|60732|59175	1.3E-4	GO:0061982	0.20177287669604316
97	5	KEGG Pathways	Prostate cancer	0.0096	HSP90B1|CREB5|CCNE2|IKBKG|PIK3CB	65928	60054|59754|59175|59160|59379	0.0015	hsa05215	0.20177287669604316
1426	26	Monarch Phenotype	Lipoprotein measurement	0.0096	ERCC1|PLCG1|KLHL8|PSEN1|RARB|SKAP1|EPB41|PXK|PNP|HLA-DQB1|MAP3K20|LILRB2|AMPD3|MAP2K7|TNIK|POC5|DGKZ|NCK1|HFE|PCCB|RAD51B|DMTN|MAP2K6|DOCK1|HMBS|AMPD2	65928	58950|59322|59121|60246|60294|59343|59640|59925|60330|59691|60753|59415|60438|59517|60924|59979|59355|59100|59436|60804|60732|60453|59511|60954|59442|60444	1.3E-4	EFO:0004732	0.20177287669604316
146	6	KEGG Pathways	Alcoholism	0.0098	PPP1R1B|HDAC11|CREB5|PRKACB|HDAC6|CALML4	65928	59472|60000|59754|59475|59181|59391	0.0016	hsa05034	0.20087739243075053
949	20	Monarch Phenotype	Hypertonia	0.0098	ERCC1|SLC12A2|ERCC8|PMS2|DLAT|PSEN1|MLH3|ERCC6|PNP|FLNA|LIPT1|PSPH|TNIK|PCCB|FXN|CRADD|ACD|IKBKG|AMPD2|BTD	65928	58950|59583|59028|58986|59880|60246|58980|59010|60330|60666|59886|60414|60924|60804|59760|59505|60531|59160|60444|61086	1.4E-4	HP:0001276	0.20087739243075053
89	6	GO Biological Process	Positive regulation of protein binding	0.0099	EPB41L5|ACE|PSEN1|EPB41|HFE|B2M	65928	59637|59952|60246|59640|59436|59697	1.3E-4	GO:0032092	0.200436480540245
225	9	Monarch Phenotype	Abnormality of the pancreas	0.0099	PMS2|RARB|MLH3|CBS|HFE|PCCB|STRA6|SLC37A4|RECQL4	65928	58986|60294|58980|60156|59436|60804|60978|59811|60726	1.4E-4	HP:0001732	0.200436480540245
90	6	Monarch Phenotype	Lymphoma	0.0099	ZAP70|PMS2|PNP|RAD54L|RECQL4|BCL10	65928	59400|58986|60330|60720|60726|60771	1.4E-4	HP:0002665	0.200436480540245
201	7	KEGG Pathways	Rap1 signaling pathway	0.0101	PLCG1|SKAP1|RAP1A|CALML4|TLN2|MAP2K6|PIK3CB	65928	59322|59343|60369|59391|60363|59511|59379	0.0017	hsa04015	0.19956786262173573
130	7	GO Biological Process	Positive regulation of apoptotic signaling pathway	0.0103	RIPK3|RIPK1|ATF3|NFATC4|NCK1|CRADD|BCL10	65928	59157|59166|59106|60912|59100|59505|60771	1.4E-4	GO:2001235	0.1987162775294828
1146	23	COMPARTMENTS	Nucleoplasm	0.0104	KLHL20|AURKA|GINS1|EAF2|GTF2H2|HDAC11|PRKDC|RARB|SF3B1|SIRT6|ATF3|ERCC6|TAF5|PRKACB|MED18|HDAC6|TDG|ELP4|KAT14|DGKZ|CLOCK|NR4A1|ACD	65928	59112|59172|59574|59847|58998|60000|59016|60294|59592|60003|59106|59010|59868|59475|59862|59181|60837|59484|60660|59355|60321|60423|60531	8.59E-5	GOCC:0005654	0.19829666607012197
31	4	Reactome Pathways	Diseases associated with the TLR signaling cascade	0.0108	LY96|IRAK4|IKBKG|TLR5	65928	59913|60933|59160|59916	1.9E-4	HSA-5602358	0.19665762445130502
463	13	Monarch Phenotype	Wide nasal bridge	0.0108	ERCC1|SLC12A2|G6PC3|CD96|KCNMA1|RP9|PRKDC|RARB|IMPDH1|ERCC6|FLNA|STRA6|IDH3B	65928	58950|59583|59802|59907|59922|60021|59016|60294|60024|59010|60666|60978|59616	1.6E-4	HP:0000431	0.19665762445130502
530	14	Monarch Phenotype	Abnormal peripheral nervous system morphology	0.0111	ERCC1|ERCC8|PMS2|NOD2|PSEN1|ERCC6|REV3L|MAP3K20|LAMA2|FXN|XRCC4|B2M|HMBS|AMPD2	65928	58950|59028|58986|60060|60246|59010|58953|60753|60900|59760|59022|59697|59442|60444	1.6E-4	HP:0000759	0.19546770212133424
403	12	Monarch Phenotype	Abnormality of cardiovascular system electrophysiology	0.0113	ERCC1|ERCC8|SCNN1B|ERCC6|SHOC2|LIPT1|DYSF|LAMA2|HFE|PCCB|FXN|HMBS	65928	58950|59028|60459|59010|59094|59886|60792|60900|59436|60804|59760|59442	1.7E-4	HP:0030956	0.19469215565165804
532	14	Monarch Phenotype	Abnormality of fluid regulation	0.0114	UROD|NOD2|EPB41|SCNN1B|NR3C2|SHOC2|PSPH|DYSF|LAMA2|HFE|PCCB|RECQL4|IKBKG|PC	65928	59433|60060|59640|60459|59958|59094|60414|60792|60900|59436|60804|60726|59160|59805	1.7E-4	HP:0011032	0.19430951486635273
469	13	Monarch Phenotype	Intrauterine growth retardation	0.0118	ERCC1|GINS1|ERCC8|PRKDC|ATRIP|RARB|ERCC6|HDAC6|PSPH|XRCC4|STRA6|RECQL4|ACD	65928	58950|59574|59028|59016|60126|60294|59010|59181|60414|59022|60978|60726|60531	1.8E-4	HP:0001511	0.19281179926938746
28	3	KEGG Pathways	Citrate cycle (TCA cycle)	0.0119	DLAT|IDH3B|PC	65928	59880|59616|59805	0.0021	hsa00020	0.19244530386074693
58	5	GO Biological Process	Myeloid leukocyte mediated immunity	0.0121	ACE|SCNN1B|FCGR3A|SYK|IRAK4	65928	59952|60459|59706|59406|60933	1.7E-4	GO:0002444	0.191721462968355
11	3	Monarch Phenotype	Annular pancreas	0.0121	RARB|STRA6|RECQL4	65928	60294|60978|60726	1.8E-4	HP:0001734	0.191721462968355
235	9	Monarch Phenotype	Abnormal large intestine morphology	0.0122	RIPK1|ZAP70|PMS2|MLH3|FLNA|HFE|SLC37A4|RECQL4|MUTYH	65928	59166|59400|58986|58980|60666|59436|59811|60726|59778	1.9E-4	HP:0002250	0.1913640169325252
56	5	GO Cellular Component	Protein serine/threonine phosphatase complex	0.0123	PPP1R15A|SHOC2|PPP2R3B|PPP2R2D|NCK1	65928	59091|59094|60828|59553|59100	1.4E-4	GO:0008287	0.19100948885606023
411	12	Monarch Phenotype	Abnormal bleeding	0.0125	UROD|ERCC8|PMS2|SF3B1|MLH3|ERCC6|SHOC2|FLNA|CBS|PCCB|SLC37A4|IKBKG	65928	59433|59028|58986|59592|58980|59010|59094|60666|60156|60804|59811|59160	2.0E-4	HP:0001892	0.19030899869919435
411	12	Monarch Phenotype	Abnormality of facial soft tissue	0.0125	ERCC1|ERCC8|CD96|NOD2|CAMK2G|ERCC6|REV3L|MAP3K20|PSPH|LAMA2|RECQL4|AMPD2	65928	58950|59028|59907|60060|60192|59010|58953|60753|60414|60900|60726|60444	2.0E-4	HP:0011799	0.19030899869919435
139	7	Monarch Phenotype	Recurrent lower respiratory tract infections	0.0127	ZAP70|PRKDC|SCNN1B|PNP|CD3E|LAMA2|HFE	65928	59400|59016|60459|60330|59721|60900|59436	2.1E-4	HP:0002783	0.18961962790440431
11	3	GO Biological Process	Telomeric loop disassembly	0.0131	POT1|XRCC3|RECQL4	65928	60108|58992|60726	1.8E-4	GO:0090657	0.1882728704344236
239	9	Monarch Phenotype	Microphthalmia	0.0132	ERCC1|ERCC8|RARB|ERCC6|REV3L|HDAC6|STRA6|RECQL4|IKBKG	65928	58950|59028|60294|59010|58953|59181|60978|60726|59160	2.2E-4	HP:0000568	0.18794260687941503
538	14	GO Biological Process	Inflammatory response	0.0133	RIPK1|CD96|LY96|PSEN1|SCNN1B|PXK|PTGS1|FCGR3A|SYK|NFATC4|IRF5|PLA2G4C|IKBKG|TLR5	65928	59166|59907|59913|60246|60459|59925|60615|59706|59406|60912|60969|59361|59160|59916	1.9E-4	GO:0006954	0.18761483590329142
480	13	Monarch Phenotype	Dysarthria	0.0135	ERCC8|PMS2|DLAT|PSEN1|MLH3|ERCC6|REV3L|SHOC2|FLNA|LIPT1|FXN|XRCC4|HMBS	65928	59028|58986|59880|60246|58980|59010|58953|59094|60666|59886|59760|59022|59442	2.2E-4	HP:0001260	0.1869666231504994
481	13	Monarch Phenotype	Abnormality of the musculature of the limbs	0.0136	ERCC1|ERCC8|ERCC6|REV3L|FLNA|MAP3K20|AMPD3|DYSF|LAMA2|PCCB|FXN|HMBS|BTD	65928	58950|59028|59010|58953|60666|60753|60438|60792|60900|60804|59760|59442|61086	2.3E-4	HP:0009127	0.18664610916297825
65	4	KEGG Pathways	Renal cell carcinoma	0.0142	GAB1|RAP1A|PAK4|PIK3CB	65928	59349|60369|60960|59379	0.0025	hsa05211	0.18477116556169434
1070	21	Monarch Phenotype	Abnormality of the endocrine system	0.0143	ERCC1|PPP2R3C|SLC12A2|ERCC8|PMS2|G6PC3|RP9|IMPDH1|SCNN1B|MLH3|ERCC6|NR3C2|REV3L|SHOC2|HFE|FXN|XRCC4|SLC37A4|RECQL4|IDH3B|BCL10	65928	58950|59550|59583|59028|58986|59802|60021|60024|60459|58980|59010|59958|58953|59094|59436|59760|59022|59811|60726|59616|60771	2.4E-4	HP:0000818	0.18446639625349381
1151	22	Monarch Phenotype	Abnormal respiratory system physiology	0.0143	RIPK1|G6PC3|ACE|NOD2|RARB|SCNN1B|REV3L|FCGR3A|FLNA|MAP3K20|LIPT1|CARD11|CBS|LAMA2|HFE|PCCB|STRA6|SLC37A4|IKBKG|HMBS|PC|BTD	65928	59166|59802|59952|60060|60294|60459|58953|59706|60666|60753|59886|59331|60156|60900|59436|60804|60978|59811|59160|59442|59805|61086	2.4E-4	HP:0002795	0.18446639625349381
442	13	TISSUES	Bone marrow cancer cell	0.0145	PPP1R15A|PLCG1|RIPK1|HSP90B1|PRKDC|SIRT6|ATF3|IMPDH1|EPB41|HDAC6|CARD11|CBS|HMBS	65928	59091|59322|59166|60054|59016|60003|59106|60024|59640|59181|59331|60156|59442	1.0E-4	BTO:0000583	0.1838631997765025
66	4	KEGG Pathways	Renin secretion	0.0145	KCNMA1|ACE|PRKACB|CALML4	65928	59922|59952|59475|59391	0.0026	hsa04924	0.1838631997765025
1077	21	Monarch Phenotype	Abnormality of the kidney	0.0149	ERCC1|PPP2R3C|ZAP70|ERCC8|G6PC3|CD96|ACE|NOD2|RARB|SCNN1B|MLH3|ERCC6|SHOC2|FLNA|XRCC4|STRA6|SLC37A4|RECQL4|B2M|HMBS|PC	65928	58950|59550|59400|59028|59802|59907|59952|60060|60294|60459|58980|59010|59094|60666|59022|60978|59811|60726|59697|59442|59805	2.6E-4	HP:0000077	0.1826813731587726
34	4	Monarch Phenotype	Premature graying of hair	0.0149	ERCC8|ERCC6|RECQL4|ACD	65928	59028|59010|60726|60531	2.6E-4	HP:0002216	0.1826813731587726
6	3	STRING Clusters	Inhibitory MHC class I receptor activity, and Antigen processing and presentation of endogenous peptide antigen via MHC class Ib	0.0155	LILRB3|LILRB1|LILRB2	65928	59412|60162|59415	4.4E-5	CL:16262	0.18096683018297086
12	3	GO Biological Process	Negative T cell selection	0.0156	ZAP70|CD3E|THEMIS	65928	59400|59721|59373	2.3E-4	GO:0043383	0.18068754016455385
223	9	GO Molecular Function	Magnesium ion binding	0.0157	ILVBL|PRKACB|MAP3K20|TDG|PSPH|MAP2K7|EPHX2|IRAK4|IDH3B	65928	59601|59475|60753|60837|60414|59517|60432|60933|59616	1.3E-4	GO:0000287	0.18041003475907663
16	4	SMART Domains	Histidine kinase-like ATPases	0.0157	PMS2|HSP90B1|MLH3|PDK2	65928	58986|60054|58980|59892	1.91E-5	SM00387	0.18041003475907663
165	6	KEGG Pathways	Tuberculosis	0.0158	NOD2|FCGR3A|SYK|CALML4|IRAK4|BCL10	65928	60060|59706|59406|59391|60933|60771	0.0029	hsa05152	0.18013429130455774
249	9	Monarch Phenotype	Stroke	0.0159	ZAP70|ERCC8|KCNMA1|ERCC6|PNP|FLNA|CBS|PIK3C2G|KCTD13	65928	59400|59028|59922|59010|60330|60666|60156|59325|59127	2.9E-4	HP:0001297	0.17986028756795486
551	14	GO Biological Process	Organophosphate biosynthetic process	0.0161	PIP5K1B|DLAT|IMPDH1|PNP|INPP1|QPRT|AMPD3|CARD11|DGKZ|NNMT|PIK3C2G|PLA2G4C|AMPD2|PIK3CB	65928	59337|59880|60024|60330|59367|60852|60438|59331|59355|60336|59325|59361|60444|59379	2.4E-4	GO:0090407	0.17931741239681503
101	6	GO Biological Process	Pattern recognition receptor signaling pathway	0.017	LY96|NOD2|MAP2K6|IRAK4|TLR5|BCL10	65928	59913|60060|59511|60933|59916|60771	2.5E-4	GO:0002221	0.1769551078621726
369	11	Monarch Phenotype	Nausea and vomiting	0.017	PMS2|SCNN1B|MLH3|NR3C2|FLNA|PCCB|RECQL4|BCL10|HMBS|PC|BTD	65928	58986|60459|58980|59958|60666|60804|60726|60771|59442|59805|61086	3.1E-4	HP:0002017	0.1769551078621726
36	4	Monarch Phenotype	Abnormal number of erythroid precursors	0.0171	UROD|G6PC3|SF3B1|PNP	65928	59433|59802|59592|60330	3.2E-4	HP:0012131	0.1767003889607846
150	7	Monarch Phenotype	Vascular disease	0.0172	ERCC8|CD96|RARB|ERCC6|MAP3K20|AMPD3|PHLDB2	65928	59028|59907|60294|59010|60753|60438|60669	3.2E-4	EFO:0004264	0.1764471553092451
1406	25	GO Biological Process	Homeostatic process	0.0177	RIPK3|PPP2R3C|SLC12A2|KCNMA1|ACE|HSP90B1|NOD2|PSEN1|SIRT6|SCNN1B|ERCC6|PRKACB|CARD11|SLC8A1|LAMA2|DISC1|HFE|FXN|PDK2|DMTN|EPHX2|SLC37A4|B2M|AMPD2|PIK3CB	65928	59157|59550|59583|59922|59952|60054|60060|60246|60003|60459|59010|59475|59331|60699|60900|60882|59436|59760|59892|60453|60432|59811|59697|60444|59379	2.7E-4	GO:0042592	0.17520267336381934
425	12	GO Biological Process	Transmembrane receptor protein tyrosine kinase signaling pathway	0.0178	PLCG1|GAB1|NGEF|ZAP70|CD3E|SHOC2|SYK|EPHB1|NFATC4|NCK1|PDK2|PIK3CB	65928	59322|59349|59682|59400|59721|59094|59406|59685|60912|59100|59892|59379	2.7E-4	GO:0007169	0.17495799976911058
117	5	KEGG Pathways	Growth hormone synthesis, secretion and action	0.0179	PLCG1|CREB5|PRKACB|MAP2K6|PIK3CB	65928	59322|59754|59475|59511|59379	0.0034	hsa04935	0.1747146969020107
5436	66	GO Biological Process	Cellular component organization	0.018	ERCC1|PPP1R15A|KLHL20|RIPK3|AURKA|MND1|CORO7|RIPK1|PPP2R3C|GINS1|SLC12A2|GAB1|EPB41L5|KCNMA1|WDR90|HDAC11|HSP90B1|PRKDC|MCM9|EML4|PSEN1|SF3B1|SIRT6|EPB41|MLH3|ERCC6|POT1|CD3E|TAF5|FLNA|PRKACB|RAD54L|MED18|HLA-DQB1|MAP3K20|HDAC6|TDG|CARD11|EPHB1|DYSF|NFATC4|TNIK|PPP2R2D|LAMA2|DISC1|PHLDB2|NCK1|HFE|FXN|RAD51B|XRCC4|DMTN|CCNE2|XRCC3|TLN2|KCTD13|PAK4|PLA2G4C|SEZ6L2|RECQL4|ACD|IKBKG|DOCK1|FEZ1|B2M|BCL…	65928	58950|59091|59112|59157|59172|59301|59115|59166|59550|59574|59583|59349|59637|59922|59973|60000|60054|59016|59577|59385|60246|59592|60003|59640|58980|59010|60108|59721|59868|60666|59475|60720|59862|59691|60753|59181|60837|59331|59685|60792|60912|60924|59553|60900|60882|60669|59100|59436|59760|60732|59022|60453|59175|58992|60363|59127|60960|59361|61062|60726|60531|59160|60954|60939|59697|60771	2.7E-4	GO:0016043	0.1744727494896694
65	5	GO Biological Process	Positive regulation of interleukin-8 production	0.018	RIPK1|NOD2|SYK|TLR5|BCL10	65928	59166|60060|59406|59916|60771	2.8E-4	GO:0032757	0.1744727494896694
304	10	GO Biological Process	Positive regulation of DNA metabolic process	0.018	ERCC1|GINS1|ERCC8|PRKDC|SIRT6|ERCC6|POT1|MAP2K7|KCTD13|ACD	65928	58950|59574|59028|59016|60003|59010|60108|59517|59127|60531	2.8E-4	GO:0051054	0.1744727494896694
492	13	GO Biological Process	Response to extracellular stimulus	0.0181	ERCC1|ACE|NOD2|ATF3|SCNN1B|ERCC6|PSPH|CBS|SLC8A1|HFE|PDK2|SLC37A4|BCL10	65928	58950|59952|60060|59106|60459|59010|60414|60156|60699|59436|59892|59811|60771	2.8E-4	GO:0009991	0.17423214251308156
13	3	GO Biological Process	Positive regulation of integrin-mediated signaling pathway	0.0181	FLNA|LAMA2|DMTN	65928	60666|60900|60453	2.8E-4	GO:2001046	0.17423214251308156
14	3	Monarch Phenotype	Opportunistic infection	0.0181	ZAP70|PNP|IKBKG	65928	59400|60330|59160	3.4E-4	HP:0031690	0.17423214251308156
256	9	Monarch Phenotype	Hypertension	0.0184	ERCC1|ERCC8|NOD2|SCNN1B|ERCC6|NR3C2|CBS|SLC37A4|HMBS	65928	58950|59028|60060|60459|59010|59958|60156|59811|59442	3.5E-4	HP:0000822	0.17351821769904635
30	4	GO Molecular Function	Protein phosphatase 1 binding	0.0192	PPP1R15A|LILRB1|SHOC2|LILRB2	65928	59091|60162|59094|59415	1.7E-4	GO:0008157	0.17166987712964504
368	11	GO Biological Process	Response to oxidative stress	0.0193	ERCC1|RIPK3|RIPK1|ERCC8|PSEN1|ERCC6|PTGS1|HDAC6|SLC8A1|FXN|PDK2	65928	58950|59157|59166|59028|60246|59010|60615|59181|60699|59760|59892	3.0E-4	GO:0006979	0.1714442690992226
44	4	WikiPathways	Renin-angiotensin-aldosterone system (RAAS)	0.0193	ACE|CAMK2G|CREB5|CALML4	65928	59952|60192|59754|59391	6.4E-4	WP4756	0.1714442690992226
15	3	UniProt Keywords	Heme biosynthesis	0.0194	UROD|FXN|HMBS	65928	59433|59760|59442	4.0E-4	KW-0350	0.1712198270069774
512	13	Monarch Phenotype	Abnormal pelvic girdle bone morphology	0.0202	ERCC1|PPP2R3C|SLC12A2|ERCC8|CD96|ATRIP|ERCC6|REV3L|FLNA|MAP3K20|HDAC6|RECQL4|B2M	65928	58950|59550|59583|59028|59907|60126|59010|58953|60666|60753|59181|60726|59697	4.1E-4	HP:0002644	0.16946486305533764
2	2	Monarch Phenotype	Posterior uveitis	0.0202	NOD2|BCL10	65928	60060|60771	4.0E-4	HP:0012123	0.16946486305533764
878	18	Monarch Phenotype	Heel bone mineral density	0.0205	ERCC1|CORO7|SLC12A2|NGEF|CAMK2G|RARB|PXK|CREB5|NR3C2|SLC8A1|HFE|RAD51B|XRCC4|CRADD|TLN2|KCTD13|THEMIS|FEZ1	65928	58950|59115|59583|59682|60192|60294|59925|59754|59958|60699|59436|60732|59022|59505|60363|59127|59373|60939	4.2E-4	EFO:0009270	0.16882461389442455
447	12	Monarch Phenotype	Abnormal enzyme/coenzyme activity	0.0206	UROD|ERCC8|DLAT|ERCC6|LIPT1|CBS|HFE|PCCB|FXN|SLC37A4|HMBS|BTD	65928	59433|59028|59880|59010|59886|60156|59436|60804|59760|59811|59442|61086	4.2E-4	HP:0012379	0.16861327796308465
68	5	GO Biological Process	I-kappaB kinase/NF-kappaB signaling	0.0208	RIPK3|NOD2|CARD11|IKBKG|BCL10	65928	59157|60060|59331|59160|60771	3.4E-4	GO:0007249	0.16819366650372386
436	12	GO Biological Process	Modulation of chemical synaptic transmission	0.0208	SLC12A2|ACE|PSEN1|PXK|RAP1A|LILRB2|EPHB1|NFATC4|LAMA2|DISC1|DGKZ|KCTD13	65928	59583|59952|60246|59925|60369|59415|59685|60912|60900|60882|59355|59127	3.4E-4	GO:0050804	0.16819366650372386
107	6	GO Biological Process	Positive regulation of chromosome organization	0.0209	ERCC1|GTF2H2|SIRT6|POT1|MAP2K7|ACD	65928	58950|58998|60003|60108|59517|60531	3.4E-4	GO:2001252	0.1679853713888946
515	11	KEGG Pathways	Pathways in cancer	0.0213	PLCG1|HSP90B1|EML4|RARB|RASSF1|PRKACB|LAMA2|CALML4|CCNE2|IKBKG|PIK3CB	65928	59322|60054|59385|60294|60297|59475|60900|59391|59175|59160|59379	0.0042	hsa05200	0.16716203965612625
37	3	KEGG Pathways	Aldosterone-regulated sodium reabsorption	0.0215	SCNN1B|NR3C2|PIK3CB	65928	60459|59958|59379	0.0043	hsa04960	0.16675615400843946
375	11	GO Biological Process	Immune effector process	0.0216	ERCC1|ACE|LILRB1|PSEN1|SCNN1B|FCGR3A|SYK|DYSF|IRAK4|B2M|BCL10	65928	58950|59952|60162|60246|60459|59706|59406|60792|60933|59697|60771	3.6E-4	GO:0002252	0.1665546248849069
868	18	GO Biological Process	Organic acid metabolic process	0.0219	ILVBL|DLAT|SDSL|PNP|PTGS1|SYK|LIPT1|QPRT|PSPH|ADHFE1|CBS|PCCB|PLA2G4C|SLC37A4|IDH3B|PC|SCLY|BTD	65928	59601|59880|59604|60330|60615|59406|59886|60852|60414|59610|60156|60804|59361|59811|59616|59805|60984|61086	3.6E-4	GO:0006082	0.16595558851598818
315	10	GO Biological Process	Regulation of leukocyte differentiation	0.0219	LILRB3|RIPK1|PPP2R3C|ZAP70|PRKDC|LILRB1|PNP|SYK|LILRB2|CARD11	65928	59412|59166|59550|59400|59016|60162|60330|59406|59415|59331	3.6E-4	GO:1902105	0.16595558851598818
1707	29	TISSUES	Respiratory system	0.0223	ERCC1|RBM42|ACE|HSP90B1|PRKDC|SIRT6|OAS2|ATF3|SCNN1B|PTGS1|FCGR3A|SHOC2|FLNA|POLL|PRKACB|TNFRSF25|CBS|RAD51B|PDK2|CLOCK|CCNE2|EPHX2|NR4A1|POLD2|IDH3B|IKBKG|B2M|HMBS|PC	65928	58950|59589|59952|60054|59016|60003|60069|59106|60459|60615|59706|59094|60666|60120|59475|59499|60156|60732|59892|60321|59175|60432|60423|60555|59616|59160|59697|59442|59805	1.7E-4	BTO:0000203	0.16516951369518393
38	3	KEGG Pathways	Homologous recombination	0.0224	RAD54L|XRCC3|POLD2	65928	60720|58992|60555	0.0046	hsa03440	0.16497519816658374
812	17	Monarch Phenotype	Functional abnormality of the inner ear	0.0227	ERCC1|PPP2R3C|SLC12A2|ERCC8|RP9|PRKDC|PSEN1|IMPDH1|ERCC6|PNP|SHOC2|FLNA|MAP3K20|FXN|XRCC4|IDH3B|BTD	65928	58950|59550|59583|59028|60021|59016|60246|60024|59010|60330|59094|60666|60753|59760|59022|59616|61086	4.8E-4	HP:0011389	0.16439741428068771
16	3	Monarch Phenotype	Reduced left ventricular ejection fraction	0.0227	DYSF|LAMA2|B2M	65928	60792|60900|59697	4.8E-4	HP:0012664	0.16439741428068771
83	5	WikiPathways	Apoptosis	0.0229	RIPK1|TNFRSF25|IRF5|CRADD|IKBKG	65928	59166|59499|60969|59505|59160	7.9E-4	WP254	0.1640164517660112
156	7	GO Biological Process	Organophosphate catabolic process	0.0235	PLCG1|PNP|INPP1|TDG|AMPD3|SMUG1|PLA2G4C	65928	59322|60330|59367|60837|60438|60681|59361	4.0E-4	GO:0046434	0.16289321377282637
2	2	GO Biological Process	Positive regulation of ferrous iron binding	0.0235	HFE|B2M	65928	59436|59697	4.0E-4	GO:1904434	0.16289321377282637
41	4	Reactome Pathways	FCGR3A-mediated IL10 synthesis	0.0238	PLCG1|FCGR3A|PRKACB|SYK	65928	59322|59706|59475|59406	5.0E-4	HSA-9664323	0.1623423042943488
392	11	Monarch Phenotype	Abnormality of the nail	0.0238	UROD|CAMK2G|SF3B1|REV3L|SHOC2|FLNA|PRKACB|HFE|RECQL4|ACD|IKBKG	65928	59433|60192|59592|58953|59094|60666|59475|59436|60726|60531|59160	5.1E-4	HP:0001597	0.1623423042943488
4592	57	Monarch Phenotype	Hematological measurement	0.0246	PPP1R15A|RIPK3|AURKA|PLCG1|LILRB3|CORO7|PPP1R1B|PPP2R3C|GINS1|SLC12A2|EPB41L5|PIP5K1B|PMS2|KCNMA1|WDR90|PRKDC|MCM9|AHCYL2|CAMK2G|PSEN1|RARB|SKAP1|ATF3|EPB41|PXK|RASSF1|POT1|CREB5|NR3C2|FCGR3A|RAP1A|FLNA|HLA-DQB1|SYK|AMPD3|MAP2K7|CBS|SLC8A1|NLRX1|TNIK|PPP2R2D|POC5|NCK1|HFE|IRF5|PCCB|CALML4|RAD51B|SMUG1|CLOCK|CRADD|TLN2|ACD|DOCK1|TLR5|BTD|PIK3CB	65928	59091|59157|59172|59322|59412|59115|59472|59550|59574|59583|59637|59337|58986|59922|59973|59016|59577|60150|60192|60246|60294|59343|59106|59640|59925|60297|60108|59754|59958|59706|60369|60666|59691|59406|60438|59517|60156|60699|60906|60924|59553|59979|59100|59436|60969|60804|59391|60732|60681|60321|59505|60363|60531|60954|59916|61086|59379	5.4E-4	EFO:0004503	0.16090648928966209
117	6	Monarch Phenotype	Abnormality of peripheral nerves	0.0246	ERCC1|ERCC8|ERCC6|LAMA2|FXN|B2M	65928	58950|59028|59010|60900|59760|59697	5.4E-4	HP:0045010	0.16090648928966209
17	3	Reactome Pathways	Removal of the Flap Intermediate from the C-strand	0.0249	POT1|POLD2|ACD	65928	60108|60555|60531	5.6E-4	HSA-174437	0.16038006529042637
978	19	Monarch Phenotype	Abnormal facial shape	0.0249	ERCC1|PPP2R3C|GINS1|SLC12A2|ERCC8|ACE|CAMK2G|ATRIP|ERCC6|SHOC2|FLNA|PRKACB|MAP3K20|PSPH|TNIK|XRCC4|CRADD|SLC37A4|RECQL4	65928	58950|59550|59574|59583|59028|59952|60192|60126|59010|59094|60666|59475|60753|60414|60924|59022|59505|59811|60726	5.5E-4	HP:0001999	0.16038006529042637
3362	45	UniProt Keywords	Acetylation	0.0251	ERCC1|MND1|PLCG1|UROD|PPP1R1B|SLC12A2|RBM42|GAB1|ZAP70|KLHL8|DLAT|HSP90B1|PRKDC|AHCYL2|EML4|SF3B1|SIRT6|SDSL|OAS2|RASSF1|PNP|FLNA|MAP3K20|ALDH1B1|TGFB1I1|PSPH|ADHFE1|MAP2K7|KAT14|POC5|NCK1|PCCB|PACRGL|EPHX2|NR4A1|NNMT|XRCC3|MAP2K6|IRAK4|POLD2|IDH3B|BCL10|HMBS|PC|SCLY	65928	58950|59301|59322|59433|59472|59583|59589|59349|59400|59121|59880|60054|59016|60150|59385|59592|60003|59604|60069|60297|60330|60666|60753|60798|60846|60414|59610|59517|60660|59979|59100|60804|59985|60432|60423|60336|58992|59511|60933|60555|59616|60771|59442|59805|60984	5.6E-4	KW-0007	0.16003262785189618
77	5	UniProt Keywords	DNA recombination	0.0251	MND1|PRKDC|RAD51B|XRCC4|XRCC3	65928	59301|59016|60732|59022|58992	5.7E-4	KW-0233	0.16003262785189618
118	6	Monarch Phenotype	Narrow forehead	0.0252	PPP2R3C|SLC12A2|CAMK2G|SHOC2|PSPH|AMPD2	65928	59550|59583|60192|59094|60414|60444	5.6E-4	HP:0000341	0.15985994592184558
4	2	WikiPathways	Arachidonic acid (AA, ARA) oxylipin metabolism	0.0256	PTGS1|EPHX2	65928	60615|60432	9.8E-4	WP5155	0.15917600346881505
43	4	Monarch Phenotype	Abnormality of the radial head	0.0256	ERCC1|CD96|FLNA|RECQL4	65928	58950|59907|60666|60726	5.9E-4	HP:0003995	0.15917600346881505
428	11	WikiPathways	VEGFA-VEGFR2 signaling	0.0259	PLCG1|GAB1|EPB41|PNP|RAP1A|TNFRSF25|MAP2K7|SLC8A1|NCK1|NR4A1|MAP2K6	65928	59322|59349|59640|60330|60369|59499|59517|60699|59100|60423|59511	0.001	WP3888	0.15867002359187482
168	7	Monarch Phenotype	Eye disease	0.0262	PMS2|CD96|HLA-DQB1|PSPH|ELP4|LAMA2|RAD51B	65928	58986|59907|59691|60414|59484|60900|60732	6.1E-4	EFO:0003966	0.15816987086802545
133	5	KEGG Pathways	Estrogen signaling pathway	0.0266	HSP90B1|CREB5|PRKACB|CALML4|PIK3CB	65928	60054|59754|59475|59391|59379	0.0057	hsa04915	0.1575118363368933
538	13	Monarch Phenotype	Diastolic blood pressure	0.0267	PLCG1|KCNMA1|ACE|WDR90|MAP3K20|AMPD3|SLC8A1|NFATC4|PHLDB2|POC5|HFE|PIK3C2G|TLN2	65928	59322|59922|59952|59973|60753|60438|60699|60912|60669|59979|59436|59325|60363	6.4E-4	EFO:0006336	0.1573488738635425
16	3	GO Biological Process	Serine family amino acid catabolic process	0.027	SDSL|CBS|SCLY	65928	59604|60156|60984	4.8E-4	GO:0009071	0.15686362358410127
663	15	GO Biological Process	Regulation of protein kinase activity	0.027	RIPK3|PPP1R1B|PPP2R3C|ACE|NOD2|PSEN1|ERCC6|RAP1A|SYK|MAP2K7|CBS|SLC8A1|CCNE2|MAP2K6|PIK3CB	65928	59157|59472|59550|59952|60060|60246|59010|60369|59406|59517|60156|60699|59175|59511|59379	4.8E-4	GO:0045859	0.15686362358410127
968	19	GO Biological Process	Chromosome organization	0.0271	ERCC1|MND1|GINS1|HDAC11|PRKDC|MCM9|EML4|SF3B1|SIRT6|MLH3|ERCC6|POT1|RAD54L|HDAC6|TDG|CCNE2|XRCC3|RECQL4|ACD	65928	58950|59301|59574|60000|59016|59577|59385|59592|60003|58980|59010|60108|60720|59181|60837|59175|58992|60726|60531	4.8E-4	GO:0051276	0.15670307091255942
343	10	Monarch Phenotype	Hypogonadism	0.0281	ERCC1|ERCC8|RP9|IMPDH1|ERCC6|REV3L|SHOC2|HFE|RECQL4|IDH3B	65928	58950|59028|60021|60024|59010|58953|59094|59436|60726|59616	6.9E-4	HP:0000135	0.155129368009492
192	8	GO Molecular Function	Protein C-terminus binding	0.0282	ERCC1|EPB41|ERCC6|PXK|MAP2K7|DGKZ|XRCC4|BCL10	65928	58950|59640|59010|59925|59517|59355|59022|60771	2.5E-4	GO:0008022	0.15497508916806388
1330	23	Monarch Phenotype	Cognition	0.0282	CORO7|EPB41L5|NGEF|ZAP70|PIP5K1B|MCM9|PSEN1|SF3B1|SKAP1|EPB41|RAP1A|MAP3K20|DYSF|PPP2R2D|LAMA2|DISC1|HFE|PCCB|PDK2|PIK3C2G|RECQL4|SCLY|MUTYH	65928	59115|59637|59682|59400|59337|59577|60246|59592|59343|59640|60369|60753|60792|59553|60900|60882|59436|60804|59892|59325|60726|60984|59778	7.0E-4	EFO:0003925	0.15497508916806388
225	8	Monarch Phenotype	Visual field defect	0.0282	PMS2|DLAT|RP9|IMPDH1|MLH3|FXN|IDH3B|BTD	65928	58986|59880|60021|60024|58980|59760|59616|61086	7.0E-4	HP:0001123	0.15497508916806388
548	13	Monarch Phenotype	Optic atrophy	0.0299	ERCC1|ERCC8|RP9|IMPDH1|ERCC6|LIPT1|CBS|FXN|RECQL4|IDH3B|IKBKG|AMPD2|BTD	65928	58950|59028|60021|60024|59010|59886|60156|59760|60726|59616|59160|60444|61086	7.5E-4	HP:0000648	0.15243288116755704
35	4	GO Molecular Function	MHC protein complex binding	0.0308	LILRB1|HLA-DQB1|LILRB2|B2M	65928	60162|59691|59415|59697	2.9E-4	GO:0023023	0.15114492834995558
532	13	GO Biological Process	Response to inorganic substance	0.0309	ERCC1|RIPK3|RIPK1|SLC12A2|KCNMA1|ERCC6|HDAC6|SLC8A1|NFATC4|HFE|FXN|DMTN|B2M	65928	58950|59157|59166|59583|59922|59010|59181|60699|60912|59436|59760|60453|59697	5.8E-4	GO:0010035	0.15100415205751655
363	11	TISSUES	Blood platelet	0.0314	HSP90B1|PSEN1|PNP|PTGS1|RAP1A|FLNA|SYK|TNIK|NCK1|DMTN|AMPD2	65928	60054|60246|60330|60615|60369|60666|59406|60924|59100|60453|60444	2.7E-4	BTO:0000132	0.15030703519267852
144	6	WikiPathways	Male infertility	0.0318	ERCC1|PMS2|MLH3|XRCC4|CLOCK|XRCC3	65928	58950|58986|58980|59022|60321|58992	0.0015	WP4673	0.14975728800155674
177	7	Monarch Phenotype	Hydronephrosis	0.0321	ERCC8|G6PC3|RARB|ERCC6|FLNA|STRA6|RECQL4	65928	59028|59802|60294|59010|60666|60978|60726	8.3E-4	HP:0000126	0.1493494967595128
20	3	Reactome Pathways	JNK (c-Jun kinases) phosphorylation and activation mediated by activated human TAK1	0.0324	NOD2|MAP2K7|IKBKG	65928	60060|59517|59160	8.5E-4	HSA-450321	0.1489454989793388
709	16	GO Molecular Function	Protein homodimerization activity	0.0328	RIPK1|LILRB1|CAMK2G|SIRT6|ATF3|FLNA|PAXX|LILRB2|TDG|PSPH|CBS|PDK2|EPHX2|IKBKG|B2M|SCLY	65928	59166|60162|60192|60003|59106|60666|59004|59415|60837|60414|60156|59892|60432|59160|59697|60984	3.2E-4	GO:0042803	0.14841261562883207
704	15	Monarch Phenotype	Abnormal cerebral cortex morphology	0.0335	ERCC1|SLC12A2|ERCC8|PRKDC|PSEN1|ERCC6|TNIK|LAMA2|XRCC4|CRADD|RECQL4|ACD|IKBKG|PC|AMPD2	65928	58950|59583|59028|59016|60246|59010|60924|60900|59022|59505|60726|60531|59160|59805|60444	8.8E-4	HP:0002538	0.1474955192963155
2125	33	TISSUES	Liver	0.0336	RIPK1|DLAT|LY96|ACE|HSP90B1|PRKDC|EML4|SF3B1|SIRT6|OAS2|EPB41|PNP|DCAF6|FLNA|PRKACB|HDAC6|ALDH1B1|QPRT|ADHFE1|CBS|DYSF|PCCB|PDK2|CLOCK|DMTN|EPHX2|NNMT|TLN2|IKBKG|B2M|HMBS|PC|AMPD2	65928	59166|59880|59913|59952|60054|59016|59385|59592|60003|60069|59640|60330|59733|60666|59475|59181|60798|60852|59610|60156|60792|60804|59892|60321|60453|60432|60336|60363|59160|59697|59442|59805|60444	3.0E-4	BTO:0000759	0.14736607226101558
44	4	GO Biological Process	Gluconeogenesis	0.0339	G6PC3|ATF3|SLC37A4|PC	65928	59802|59106|59811|59805	6.4E-4	GO:0006094	0.1469800301796918
1669	27	GO Biological Process	Regulation of cell population proliferation	0.0339	RIPK3|PLCG1|ZAP70|EAF2|ACE|NOD2|PRKDC|LILRB1|RARB|SIRT6|ATF3|PNP|CD3E|PTGS1|FCGR3A|SYK|LILRB2|TGFB1I1|CARD11|EPHB1|DISC1|NCK1|FXN|RAD51B|NR4A1|IRAK4|B2M	65928	59157|59322|59400|59847|59952|60060|59016|60162|60294|60003|59106|60330|59721|60615|59706|59406|59415|60846|59331|59685|60882|59100|59760|60732|60423|60933|59697	6.4E-4	GO:0042127	0.1469800301796918
3	2	GO Biological Process	Isoleucine biosynthetic process	0.0343	ILVBL|SDSL	65928	59601|59604	6.6E-4	GO:0009097	0.14647058799572296
3	2	GO Biological Process	Tubulin deacetylation	0.0343	FLNA|HDAC6	65928	60666|59181	6.6E-4	GO:0090042	0.14647058799572296
3	2	GO Biological Process	Positive regulation of DNA helicase activity	0.0343	GTF2H2|POT1	65928	58998|60108	6.6E-4	GO:1905776	0.14647058799572296
490	12	Monarch Phenotype	Abnormality of the middle ear	0.0347	SLC12A2|ERCC8|RP9|IMPDH1|ERCC6|PNP|CD3E|FCGR3A|FLNA|RECQL4|IDH3B|B2M	65928	59583|59028|60021|60024|59010|60330|59721|59706|60666|60726|59616|59697	9.2E-4	HP:0000370	0.14596705252091263
49	4	Monarch Phenotype	Recurrent viral infections	0.0351	ZAP70|PNP|FCGR3A|BTD	65928	59400|60330|59706|61086	9.4E-4	HP:0004429	0.1454692883534176
47	3	KEGG Pathways	Vibrio cholerae infection	0.0355	PLCG1|SLC12A2|PRKACB	65928	59322|59583|59475	0.008	hsa05110	0.1449771646944906
920	18	GO Biological Process	Regulation of anatomical structure morphogenesis	0.036	AURKA|PLCG1|SLC12A2|GAB1|NGEF|PRKDC|PSEN1|SIRT6|EPB41|FLNA|NFATC4|TNIK|DISC1|PHLDB2|DMTN|PAK4|DOCK1|PIK3CB	65928	59172|59322|59583|59349|59682|59016|60246|60003|59640|60666|60912|60924|60882|60669|60453|60960|60954|59379	7.1E-4	GO:0022603	0.14436974992327128
50	4	Reactome Pathways	Diseases of DNA repair	0.0362	PMS2|ATRIP|RAD51B|MUTYH	65928	58986|60126|60732|59778	0.001	HSA-9675135	0.14412914294668341
149	6	WikiPathways	Regulation of actin cytoskeleton	0.0366	PIP5K1B|RASSF7|PIK3C2G|PAK4|DOCK1|PIK3CB	65928	59337|60525|59325|60960|60954|59379	0.0018	WP51	0.14365189146055896
639	14	Monarch Phenotype	Abnormal bone structure	0.0369	ERCC1|UROD|ERCC8|CD96|ERCC6|FLNA|HDAC6|CBS|HFE|PCCB|SLC37A4|RECQL4|IKBKG|B2M	65928	58950|59433|59028|59907|59010|60666|59181|60156|59436|60804|59811|60726|59160|59697	0.001	HP:0003330	0.14329736338409396
497	12	Monarch Phenotype	Total cholesterol measurement	0.0373	PLCG1|KLHL8|SKAP1|PXK|LILRB2|AMPD3|POC5|NCK1|HFE|DMTN|MAP2K6|AMPD2	65928	59322|59121|59343|59925|59415|60438|59979|59100|59436|60453|59511|60444	0.001	EFO:0004574	0.14282911681913124
430	11	Reactome Pathways	Diseases of signal transduction by growth factor receptors and second messengers	0.0375	PLCG1|GAB1|HDAC11|CAMK2G|EML4|PSEN1|SHOC2|RAP1A|HDAC6|NR4A1|PIK3CB	65928	59322|59349|60000|60192|59385|60246|59094|60369|59181|60423|59379	0.0011	HSA-5663202	0.1425968732272281
27	3	WikiPathways	Photodynamic therapy-induced unfolded protein response	0.0375	PPP1R15A|HSP90B1|ATF3	65928	59091|60054|59106	0.0019	WP3613	0.1425968732272281
27	3	WikiPathways	SARS-CoV-2 mitochondrial chronic oxidative stress and endothelial dysfunction	0.0375	ACE|SIRT6|NLRX1	65928	59952|60003|60906	0.0019	WP5183	0.1425968732272281
90	5	Reactome Pathways	Interferon gamma signaling	0.0378	CAMK2G|OAS2|HLA-DQB1|IRF5|B2M	65928	60192|60069|59691|60969|59697	0.0011	HSA-877300	0.14225082001627748
412	11	GO Biological Process	Developmental growth	0.0379	ERCC1|AURKA|GINS1|EPB41L5|RARB|SCNN1B|ERCC6|HDAC6|FXN|RAD51B|STRA6	65928	58950|59172|59574|59637|60294|60459|59010|59181|59760|60732|60978	7.6E-4	GO:0048589	0.14213607900319275
150	5	KEGG Pathways	Cellular senescence	0.0383	NFATC4|CALML4|CCNE2|MAP2K6|PIK3CB	65928	60912|59391|59175|59511|59379	0.0091	hsa04218	0.14168012260313773
28	3	WikiPathways	TLR4 signaling and tolerance	0.0392	RIPK1|IRAK4|IKBKG	65928	59166|60933|59160	0.0021	WP3851	0.14067139329795428
176	7	GO Biological Process	Peptidyl-tyrosine phosphorylation	0.0395	ZAP70|NOD2|CD3E|SYK|MAP2K7|EPHB1|MAP2K6	65928	59400|60060|59721|59406|59517|59685|59511	8.0E-4	GO:0018108	0.140340290437354
448	12	GO Molecular Function	Actin binding	0.0406	KLHL20|CORO7|KCNMA1|ACE|NOD2|EPB41|PXK|FLNA|HDAC6|NCK1|DMTN|TLN2	65928	59112|59115|59922|59952|60060|59640|59925|60666|59181|59100|60453|60363	4.3E-4	GO:0003779	0.1391473966422806
153	5	KEGG Pathways	Cushing syndrome	0.0409	CREB5|RAP1A|PRKACB|CCNE2|NR4A1	65928	59754|60369|59475|59175|60423	0.0099	hsa04934	0.1388276691992658
1612	26	GO Biological Process	Negative regulation of response to stimulus	0.0414	ERCC1|PPP1R15A|PLCG1|RIPK1|SLC12A2|GTF2H2|CD96|NOD2|LILRB1|PSEN1|ATF3|ERCC6|CD3E|PRKACB|SYK|TGFB1I1|NLRX1|NFATC4|PHLDB2|DGKZ|NCK1|HFE|FXN|CLOCK|KCTD13|PIK3CB	65928	58950|59091|59322|59166|59583|58998|59907|60060|60162|60246|59106|59010|59721|59475|59406|60846|60906|60912|60669|59355|59100|59436|59760|60321|59127|59379	8.5E-4	GO:0048585	0.1382999658879101
1016	19	GO Biological Process	Negative regulation of cell death	0.0414	KLHL20|AURKA|RIPK1|HSP90B1|NOD2|PRKDC|LILRB1|PSEN1|FLNA|CBS|NFATC4|NCK1|FXN|NR4A1|PAK4|IKBKG|BCL10|MUTYH|PIK3CB	65928	59112|59172|59166|60054|60060|59016|60162|60246|60666|60156|60912|59100|59760|60423|60960|59160|60771|59778|59379	8.6E-4	GO:0060548	0.1382999658879101
20	3	GO Biological Process	Amyloid fibril formation	0.0414	RIPK3|RIPK1|B2M	65928	59157|59166|59697	8.5E-4	GO:1990000	0.1382999658879101
156	6	WikiPathways	Myometrial relaxation and contraction pathways	0.0414	PLCG1|CAMK2G|ATF3|PRKACB|SLC8A1|DGKZ	65928	59322|60192|59106|59475|60699|59355	0.0022	WP289	0.1382999658879101
73	5	GO Molecular Function	Protein self-association	0.0424	EML4|TDG|CARD11|DMTN|BCL10	65928	59385|60837|59331|60453|60771	4.6E-4	GO:0043621	0.13726341434072672
54	4	Reactome Pathways	Pyruvate metabolism and Citric Acid (TCA) cycle	0.0429	DLAT|ADHFE1|PDK2|IDH3B	65928	59880|59610|59892|59616	0.0013	HSA-71406	0.13675427078152758
1390	23	Monarch Phenotype	Myeloid white cell count	0.0431	CORO7|PPP2R3C|SLC12A2|PMS2|CAMK2G|RARB|ATF3|RASSF1|CREB5|NR3C2|RAP1A|HLA-DQB1|AMPD3|CBS|SLC8A1|PPP2R2D|NCK1|IRF5|CALML4|RAD51B|CLOCK|CRADD|TLN2	65928	59115|59550|59583|58986|60192|60294|59106|60297|59754|59958|60369|59691|60438|60156|60699|59553|59100|60969|59391|60732|60321|59505|60363	0.0012	EFO:0007988	0.13655227298392686
1103	20	GO Biological Process	Cellular response to endogenous stimulus	0.0432	PLCG1|PPP1R1B|GAB1|EPB41L5|ACE|HSP90B1|NOD2|PRKDC|PSEN1|RARB|SCNN1B|NR3C2|SHOC2|RAP1A|FLNA|SLC8A1|HFE|PDK2|DMTN|NR4A1	65928	59322|59472|59349|59637|59952|60054|60060|59016|60246|60294|60459|59958|59094|60369|60666|60699|59436|59892|60453|60423	9.1E-4	GO:0071495	0.1364516253185088
157	5	KEGG Pathways	Hepatitis C	0.0436	RIPK1|OAS2|PPP2R2D|IKBKG|PIK3CB	65928	59166|60069|59553|59160|59379	0.0109	hsa05160	0.1360513510731414
86	5	GO Biological Process	Regulation of T cell mediated immunity	0.0437	RIPK3|NOD2|LILRB1|HFE|B2M	65928	59157|60060|60162|59436|59697	9.2E-4	GO:0002709	0.1359518563029578
249	8	Monarch Phenotype	Hair colour measurement	0.0447	NGEF|SKAP1|CREB5|REV3L|SHOC2|TNIK|RAD51B|PC	65928	59682|59343|59754|58953|59094|60924|60732|59805	0.0013	EFO:0007822	0.13496924768680635
21	3	GO Biological Process	Regulation of antigen processing and presentation	0.045	NOD2|LILRB2|HFE	65928	60060|59415|59436	9.7E-4	GO:0002577	0.13467874862246562
1716	27	GO Biological Process	Positive regulation of RNA biosynthetic process	0.045	ERCC1|RIPK3|RIPK1|GINS1|EAF2|NOD2|PRKDC|LILRB1|PSEN1|RARB|SF3B1|SKAP1|ATF3|ERCC6|CREB5|DCAF6|TAF5|MED18|TGFB1I1|MAP2K7|NFATC4|NCK1|IRF5|CLOCK|NR4A1|IKBKG|BCL10	65928	58950|59157|59166|59574|59847|60060|59016|60162|60246|60294|59592|59343|59106|59010|59754|59733|59868|59862|60846|59517|60912|59100|60969|60321|60423|59160|60771	9.7E-4	GO:1902680	0.13467874862246562
4	2	GO Biological Process	Positive regulation of mast cell cytokine production	0.0453	SYK|BCL10	65928	59406|60771	9.8E-4	GO:0032765	0.1343901797987168
322	10	TISSUES	Cervical carcinoma cell	0.0453	RIPK3|AURKA|RIPK1|HSP90B1|PRKDC|REV3L|HDAC6|XRCC4|CCNE2|PAK4	65928	59157|59172|59166|60054|59016|58953|59181|59022|59175|60960	4.3E-4	BTO:0000180	0.1343901797987168
54	3	KEGG Pathways	Regulation of lipolysis in adipocytes	0.0453	PTGS1|PRKACB|PIK3CB	65928	60615|59475|59379	0.0115	hsa04923	0.1343901797987168
159	5	KEGG Pathways	MicroRNAs in cancer	0.0453	PLCG1|RASSF1|CCNE2|PAK4|PIK3CB	65928	59322|60297|59175|60960|59379	0.0115	hsa05206	0.1343901797987168
94	5	Monarch Phenotype	Short palm	0.0457	PPP2R3C|CAMK2G|FLNA|HDAC6|RECQL4	65928	59550|60192|60666|59181|60726	0.0013	HP:0004279	0.134008379993015
133	6	GO Biological Process	Regulation of dephosphorylation	0.0465	PPP1R15A|RIPK3|PPP1R1B|PPP2R3C|HSP90B1|LILRB2	65928	59091|59157|59472|59550|60054|59415	0.001	GO:0035303	0.1332547047110046
95	5	Monarch Phenotype	Leukocytosis	0.0469	ZAP70|SF3B1|CD3E|CARD11|IKBKG	65928	59400|59592|59721|59331|59160	0.0014	HP:0001974	0.1328827157284917
96	5	Reactome Pathways	VEGFA-VEGFR2 Pathway	0.0473	PLCG1|PRKACB|NCK1|DOCK1|PIK3CB	65928	59322|59475|59100|60954|59379	0.0015	HSA-4420097	0.13251388592621885
185	7	GO Biological Process	Regulation of MAP kinase activity	0.048	NOD2|PSEN1|SYK|MAP2K7|CBS|MAP2K6|PIK3CB	65928	60060|60246|59406|59517|60156|59511|59379	0.0011	GO:0043405	0.1318758762624413
89	5	GO Biological Process	DNA duplex unwinding	0.0481	GINS1|MCM9|POT1|RAD54L|RECQL4	65928	59574|59577|60108|60720|60726	0.0011	GO:0032508	0.13178549236261683
254	8	Monarch Phenotype	Chorea	0.0484	SLC12A2|DLAT|KCNMA1|ERCC6|DYSF|TNIK|FXN|CRADD	65928	59583|59880|59922|59010|60792|60924|59760|59505	0.0015	HP:0002072	0.13151546383555873
22	3	GO Biological Process	Cellular sodium ion homeostasis	0.0485	SLC12A2|SCNN1B|SLC8A1	65928	59583|60459|60699	0.0011	GO:0006883	0.13142582613977363
449	11	Monarch Phenotype	Hematocrit	0.0485	RIPK3|PLCG1|PPP1R1B|EPB41L5|AHCYL2|PXK|FCGR3A|AMPD3|POC5|HFE|RAD51B	65928	59157|59322|59472|59637|60150|59925|59706|60438|59979|59436|60732	0.0015	EFO:0004348	0.13142582613977363
2399	34	UniProt Keywords	Ubl conjugation	0.0486	ERCC1|PPP1R15A|RIPK3|AURKA|PLCG1|CORO7|RIPK1|ZAP70|CREM|RP9|NOD2|PRKDC|SF3B1|SNRNP48|ATF3|ERCC6|CREB5|FLNA|SYK|HDAC6|TDG|RASSF7|EPHB1|CBS|NFATC4|DISC1|IRF5|XRCC4|CLOCK|ZNF567|PAK4|ACD|IKBKG|FEZ1	65928	58950|59091|59157|59172|59322|59115|59166|59400|59751|60021|60060|59016|59592|60315|59106|59010|59754|60666|59406|59181|60837|60525|59685|60156|60912|60882|60969|59022|60321|60756|60960|60531|59160|60939	0.0012	KW-0832	0.13133637307377066
163	5	KEGG Pathways	cGMP-PKG signaling pathway	0.0487	KCNMA1|CREB5|SLC8A1|NFATC4|CALML4	65928	59922|59754|60699|60912|59391	0.0126	hsa04022	0.13124710387853658
25	3	Monarch Phenotype	Bowed forearm bones	0.0495	FLNA|RECQL4|B2M	65928	60666|60726|59697	0.0015	HP:0003956	0.13053948010664312

## Sheet: Supplementary Table 3B
Supplementary Table 3B. Gene ontology and pathway enrichment analysis for comparison no vs partial response
# background genes	# genes	category	description	FDR value	genes	network.SUID	nodes.SUID	p-value	term name	transferred FDR value
120	10	WikiPathways	DNA repair pathways, full network	8.53E-10	ERCC1|GTF2H4|ERCC8|PMS2|REV3L|RAP1A|POLL|XRCC4|POLD2|MUTYH	105576	101051|101081|101105|101087|101054|101777|101861|101099|101867|101462	1.09E-12	WP4946	1.0
6568	41	GO Biological Process	Cellular metabolic process	1.17E-7	ERCC1|MRPS34|AURKA|GTF2H4|HEXB|TEP1|TAF12|ERCC8|PMS2|KLHL8|ACE|AHCYL2|RNF14|ZNRD1|PRKCD|SIRT6|MRPL43|SCNN1B|REV3L|PNP|POLL|INPP5B|HDAC6|TGFB1I1|GPT|QPRT|CBS|TSTD1|NFATC4|ACSF2|HRAS|XRCC4|XRCC3|KCTD13|POLD2|RECQL4|MRPL28|B3GALNT1|AMPD2|MUTYH|PIK3CB	105576	101051|101111|101195|101081|101345|101393|101339|101105|101087|101504|101549|101669|101705|101330|101741|101618|101120|101819|101054|101762|101861|101933|101204|101708|101552|101957|101672|101798|102008|101807|101198|101099|101093|101507|101867|102086|101114|101348|101879|101462|101744	7.43E-12	GO:0044237	0.7643373228440705
1710	19	COMPARTMENTS	Catalytic complex	5.25E-5	GTF2H4|HEXB|TAF12|ERCC8|PMS2|KLHL8|HDAC11|ZNRD1|NR3C2|REV3L|DCAF6|HDAC6|GPT|QPRT|HRAS|XRCC4|KCTD13|POLD2|PIK3CB	105576	101081|101345|101339|101105|101087|101504|101615|101330|101564|101054|101450|101204|101552|101957|101198|101099|101507|101867|101744	2.28E-8	GOCC:1902494	0.4719171511222654
204	8	GO Biological Process	Double-strand break repair	8.65E-5	ERCC1|ERCC8|SIRT6|REV3L|POLL|XRCC4|XRCC3|RECQL4	105576	101051|101105|101618|101054|101861|101099|101093|102086	6.62E-8	GO:0006302	0.448005409441231
784	12	GO Cellular Component	Intracellular protein-containing complex	2.2E-4	GTF2H4|TAF12|ERCC8|KLHL8|RNF14|ZNRD1|REV3L|DCAF6|RAP1A|XRCC4|KCTD13|POLD2	105576	101081|101339|101105|101504|101705|101330|101054|101450|101777|101099|101507|101867	6.31E-7	GO:0140535	0.4033032046845647
322	8	COMPARTMENTS	Transferase complex, transferring phosphorus-containing groups	8.8E-4	GTF2H4|TAF12|ZNRD1|REV3L|GPT|XRCC4|POLD2|PIK3CB	105576	101081|101339|101330|101054|101552|101099|101867|101744	1.9E-6	GOCC:0061695	0.3369169870530775
43	4	GO Cellular Component	DNA repair complex	0.0015	ERCC1|ERCC8|PMS2|XRCC4	105576	101051|101105|101087|101099	6.48E-6	GO:1990391	0.3113786382554492
32	4	STRING Clusters	Mixed, incl. Cell-extracellular matrix interactions, and Leukocyte adhesion deficiency 3	0.0019	SKAP1|FLNA|TGFB1I1|TLN2	105576	101768|101903|101708|101771	2.19E-6	CL:18121	0.300058562731564
2506	20	GO Biological Process	Biosynthetic process	0.002	MRPS34|GTF2H4|HEXB|TEP1|TAF12|ZNRD1|SIRT6|MRPL43|REV3L|PNP|POLL|GPT|QPRT|CBS|NFATC4|POLD2|MRPL28|B3GALNT1|AMPD2|PIK3CB	105576	101111|101081|101345|101393|101339|101330|101618|101120|101054|101762|101861|101552|101957|101672|102008|101867|101114|101348|101879|101744	1.87E-6	GO:0009058	0.29760225337927243
46	4	KEGG Pathways	Nucleotide excision repair	0.0026	ERCC1|GTF2H4|ERCC8|POLD2	105576	101051|101081|101105|101867	8.32E-6	hsa03420	0.2850382758805876
201	6	KEGG Pathways	Rap1 signaling pathway	0.0026	SKAP1|RAP1A|HRAS|CALML4|TLN2|PIK3CB	105576	101768|101777|101198|101558|101771|101744	1.5E-5	hsa04015	0.2850382758805876
101	5	KEGG Pathways	C-type lectin receptor signaling pathway	0.0026	PRKCD|NFATC4|HRAS|CALML4|PIK3CB	105576	101741|102008|101198|101558|101744	7.82E-6	hsa04625	0.2850382758805876
239	8	Monarch Phenotype	Microphthalmia	0.0026	ERCC1|ERCC8|REV3L|HDAC6|HRAS|STRA6|RECQL4|SYNGAP1	105576	101051|101105|101054|101204|101198|102053|102086|102029	2.14E-7	HP:0000568	0.2850382758805876
1113	13	GO Biological Process	Organonitrogen compound catabolic process	0.0032	AURKA|HEXB|ERCC8|KLHL8|ACE|RNF14|PNP|HDAC6|TGFB1I1|GPT|QPRT|CBS|KCTD13	105576	101195|101345|101105|101504|101549|101705|101762|101204|101708|101552|101957|101672|101507	3.92E-6	GO:1901565	0.2750949388479701
1290	13	GO Cellular Component	Nuclear protein-containing complex	0.0035	ERCC1|GTF2H4|TEP1|TAF12|ERCC8|PMS2|HDAC11|ZNRD1|FLNA|HDAC6|XRCC4|XRCC3|POLD2	105576	101051|101081|101393|101339|101105|101087|101615|101330|101903|101204|101099|101093|101867	1.9E-5	GO:0140513	0.2708036335984882
6	3	Monarch Phenotype	Slender nose	0.0041	ERCC1|ERCC8|RECQL4	105576	101051|101105|102086	1.35E-6	HP:0000417	0.2632266762513948
14	3	GO Biological Process	Telomere maintenance via recombination	0.006	ERCC1|TEP1|XRCC3	105576	101051|101393|101093	1.08E-5	GO:0000722	0.244992420623962
3309	21	COMPARTMENTS	Intracellular non-membrane-bounded organelle	0.0062	ERCC1|MRPS34|AURKA|TEP1|PMS2|ACE|HDAC11|ZNRD1|SIRT6|MRPL43|FLNA|POLL|HDAC6|TGFB1I1|GPT|XRCC4|XRCC3|TLN2|POLD2|RECQL4|MRPL28	105576	101051|101111|101195|101393|101087|101549|101615|101330|101618|101120|101903|101861|101204|101708|101552|101099|101093|101771|101867|102086|101114	3.48E-5	GOCC:0043232	0.2434221968857175
71	4	COMPARTMENTS	Chromosome, telomeric region	0.0064	ERCC1|TEP1|SIRT6|RECQL4	105576	101051|101393|101618|102086	4.19E-5	GOCC:0000781	0.2419018300322265
1785	17	DISEASES	Autosomal recessive disease	0.0065	ERCC1|MRPS34|HEXB|ERCC8|PMS2|PRKCD|SCNN1B|REV3L|PNP|FLNA|POLL|CBS|XRCC4|STRA6|RECQL4|AMPD2|MUTYH	105576	101051|101111|101345|101105|101087|101741|101819|101054|101762|101903|101861|101672|101099|102053|102086|101879|101462	1.41E-6	DOID:0050737	0.2411593727804028
91	5	Monarch Phenotype	Failure to thrive in infancy	0.0067	ERCC1|PRKCD|SCNN1B|HRAS|RECQL4	105576	101051|101741|101819|101198|102086	4.81E-6	HP:0001531	0.23970812434181726
167	6	Monarch Phenotype	Kyphoscoliosis	0.0067	ERCC1|MRPS34|FLNA|CBS|HRAS|RECQL4	105576	101051|101111|101903|101672|101198|102086	5.38E-6	HP:0002751	0.23970812434181726
33	3	KEGG Pathways	Nicotinate and nicotinamide metabolism	0.0073	SIRT6|PNP|QPRT	105576	101618|101762|101957	1.1E-4	hsa00760	0.23560096279342158
33	3	KEGG Pathways	Base excision repair	0.0073	POLL|POLD2|MUTYH	105576	101861|101867|101462	1.1E-4	hsa03410	0.23560096279342158
37	3	KEGG Pathways	Aldosterone-regulated sodium reabsorption	0.0073	SCNN1B|NR3C2|PIK3CB	105576	101819|101564|101744	1.5E-4	hsa04960	0.23560096279342158
183	5	KEGG Pathways	Viral carcinogenesis	0.0073	GTF2H4|HDAC11|HDAC6|HRAS|PIK3CB	105576	101081|101615|101204|101198|101744	1.2E-4	hsa05203	0.23560096279342158
840	11	Monarch Phenotype	Functional abnormality of the gastrointestinal tract	0.0073	MRPS34|ERCC8|PMS2|PRKCD|REV3L|PNP|FLNA|CBS|HRAS|RECQL4|SYNGAP1	105576	101111|101105|101087|101741|101054|101762|101903|101672|101198|102086|102029	8.73E-6	HP:0012719	0.23560096279342158
50	4	Monarch Phenotype	Hypoplastic ilia	0.0081	ERCC1|ERCC8|FLNA|HDAC6	105576	101051|101105|101903|101204	1.13E-5	HP:0000946	0.2306211519054464
221	7	GO Molecular Function	Catalytic activity, acting on DNA	0.0092	TEP1|PMS2|REV3L|POLL|XRCC3|RECQL4|MUTYH	105576	101393|101087|101054|101861|101093|102086|101462	1.87E-6	GO:0140097	0.22452318105304253
444	8	GO Biological Process	Response to radiation	0.0097	ERCC1|ERCC8|PRKCD|SIRT6|NFATC4|HRAS|XRCC4|SYNGAP1	105576	101051|101105|101741|101618|102008|101198|101099|102029	1.9E-5	GO:0009314	0.22198885778154717
321	7	Monarch Phenotype	Abnormality of the tongue	0.0103	HEXB|PRKCD|REV3L|FLNA|HRAS|SYNGAP1|AMPD2	105576	101345|101741|101054|101903|101198|102029|101879	2.02E-5	HP:0000157	0.2191147433313686
51	3	KEGG Pathways	Fanconi anemia pathway	0.0112	ERCC1|PMS2|REV3L	105576	101051|101087|101054	3.7E-4	hsa03460	0.21510321025144227
64	4	GO Biological Process	Protein deacetylation	0.0117	HDAC11|SIRT6|FLNA|HDAC6	105576	101615|101618|101903|101204	2.84E-5	GO:0006476	0.2130117191857104
65	4	Monarch Phenotype	Fibroma	0.0119	PMS2|PRKCD|FLNA|HRAS	105576	101087|101741|101903|101198	3.01E-5	HP:0010614	0.21220004664448563
4	2	COMPARTMENTS	Zeta DNA polymerase complex	0.0132	REV3L|POLD2	105576	101054|101867	9.74E-5	GOCC:0016035	0.20723514238183868
1169	12	Monarch Phenotype	Abnormal cardiovascular system physiology	0.0132	ERCC1|HEXB|ERCC8|PMS2|ACE|SCNN1B|NR3C2|FLNA|CBS|HRAS|KCTD13|STRA6	105576	101051|101345|101105|101087|101549|101819|101564|101903|101672|101198|101507|102053	3.56E-5	HP:0011025	0.20723514238183868
5438	27	GO Cellular Component	Cytosol	0.0142	AURKA|PMS2|AHCYL2|RNF14|PRKCD|SKAP1|NR3C2|PNP|DCAF6|RAP1A|FLNA|INPP5B|HDAC6|TGFB1I1|GPT|QPRT|CBS|TSTD1|NFATC4|HRAS|XRCC4|XRCC3|KCTD13|SYNGAP1|MRPL28|AMPD2|PIK3CB	105576	101195|101087|101669|101705|101741|101768|101564|101762|101450|101777|101903|101933|101204|101708|101552|101957|101672|101798|102008|101198|101099|101093|101507|102029|101114|101879|101744	1.2E-4	GO:0005829	0.20373814878391985
12	2	KEGG Pathways	Non-homologous end-joining	0.0151	POLL|XRCC4	105576	101861|101099	5.8E-4	hsa03450	0.20079532676187659
15	2	KEGG Pathways	Glycosphingolipid biosynthesis - globo and isoglobo series	0.0153	HEXB|B3GALNT1	105576	101345|101348	8.7E-4	hsa00603	0.20016521854613623
1435	11	KEGG Pathways	Metabolic pathways	0.0153	HEXB|AHCYL2|SIRT6|PNP|INPP5B|GPT|QPRT|CBS|B3GALNT1|AMPD2|PIK3CB	105576	101345|101669|101618|101762|101933|101552|101957|101672|101348|101879|101744	9.7E-4	hsa01100	0.20016521854613623
68	3	KEGG Pathways	Central carbon metabolism in cancer	0.0153	SIRT6|HRAS|PIK3CB	105576	101618|101198|101744	8.2E-4	hsa05230	0.20016521854613623
3114	20	GO Biological Process	Positive regulation of cellular metabolic process	0.0183	ERCC1|AURKA|HEXB|TAF12|ERCC8|ACE|RNF14|PRKCD|SIRT6|SKAP1|DCAF6|RAP1A|HDAC6|TGFB1I1|GPT|TSTD1|NFATC4|HRAS|KCTD13|PIK3CB	105576	101051|101195|101345|101339|101105|101549|101705|101741|101618|101768|101450|101777|101204|101708|101552|101798|102008|101198|101507|101744	5.01E-5	GO:0031325	0.19159104036805932
90	4	Monarch Phenotype	Lymphoma	0.0217	PMS2|PRKCD|PNP|RECQL4	105576	101087|101741|101762|102086	1.0E-4	HP:0002665	0.18343046828918969
576	8	Monarch Phenotype	Abnormality of the lymphatic system	0.0237	ERCC1|HEXB|ERCC8|PRKCD|SCNN1B|PNP|HRAS|STRA6	105576	101051|101345|101105|101741|101819|101762|101198|102053	1.2E-4	HP:0100763	0.17920856984654554
96	4	Monarch Phenotype	Hypotension	0.0242	HEXB|ACE|SCNN1B|NR3C2	105576	101345|101549|101819|101564	1.3E-4	HP:0002615	0.1782087937948409
23	2	KEGG Pathways	Mismatch repair	0.0244	PMS2|POLD2	105576	101087|101867	0.0019	hsa03430	0.17781465549188255
94	3	KEGG Pathways	Phosphatidylinositol signaling system	0.0244	INPP5B|CALML4|PIK3CB	105576	101933|101558|101744	0.002	hsa04070	0.17781465549188255
712	9	GO Biological Process	Regulation of cellular response to stress	0.0263	ERCC1|TAF12|ERCC8|PRKCD|SIRT6|FLNA|HDAC6|HRAS|PIK3CB	105576	101051|101339|101105|101741|101618|101903|101204|101198|101744	8.43E-5	GO:0080135	0.17422377015416118
978	10	Monarch Phenotype	Abnormal facial shape	0.0276	ERCC1|MRPS34|HEXB|ERCC8|ACE|FLNA|HRAS|XRCC4|RECQL4|SYNGAP1	105576	101051|101111|101345|101105|101549|101903|101198|101099|102086|102029	1.8E-4	HP:0001999	0.1719133482977321
2902	18	COMPARTMENTS	Intracellular organelle lumen	0.0286	MRPS34|AURKA|GTF2H4|HEXB|TEP1|TAF12|ERCC8|HDAC11|ZNRD1|PRKCD|SIRT6|MRPL43|PNP|HDAC6|TGFB1I1|HRAS|POLD2|MRPL28	105576	101111|101195|101081|101345|101393|101339|101105|101615|101330|101741|101618|101120|101762|101204|101708|101198|101867|101114	2.2E-4	GOCC:0070013	0.17020898572253584
638	8	Monarch Phenotype	Abnormality of urine homeostasis	0.0312	ERCC1|ERCC8|SCNN1B|NR3C2|PNP|CBS|HRAS|MUTYH	105576	101051|101105|101819|101564|101762|101672|101198|101462	2.3E-4	HP:0003110	0.16604222549379005
480	7	Monarch Phenotype	Dysarthria	0.0315	HEXB|ERCC8|PMS2|REV3L|FLNA|HRAS|XRCC4	105576	101345|101105|101087|101054|101903|101198|101099	2.4E-4	HP:0001260	0.16558396808786738
94	4	GO Biological Process	Negative regulation of protein binding	0.034	AURKA|ACE|PRKCD|NFATC4	105576	101195|101549|101741|102008	1.2E-4	GO:0032091	0.16192665450934146
28	3	GO Molecular Function	DNA polymerase activity	0.0343	TEP1|REV3L|POLL	105576	101393|101054|101861	6.93E-5	GO:0034061	0.16150597068987382
22	3	GO Molecular Function	DNA damage sensor activity	0.0343	PMS2|SIRT6|XRCC3	105576	101087|101618|101093	3.58E-5	GO:0140612	0.16150597068987382
35	3	GO Biological Process	Blood vessel remodeling	0.0353	ACE|FLNA|CBS	105576	101549|101903|101672	1.3E-4	GO:0001974	0.1601297974399997
5	2	GO Biological Process	Cilium disassembly	0.0362	AURKA|HDAC6	105576	101195|101204	1.4E-4	GO:0061523	0.1589241734796846
128	4	GO Cellular Component	Nuclear matrix	0.0364	TEP1|ERCC8|PRKCD|TGFB1I1	105576	101393|101105|101741|101708	3.7E-4	GO:0016363	0.15866032965257265
897	9	Monarch Phenotype	Spasticity	0.0435	ERCC1|MRPS34|HEXB|ERCC8|PMS2|PNP|FLNA|SYNGAP1|AMPD2	105576	101051|101111|101345|101105|101087|101762|101903|102029|101879	4.6E-4	HP:0001257	0.1501271464593654
249	5	Monarch Phenotype	Stroke	0.0443	ERCC8|PNP|FLNA|CBS|KCTD13	105576	101105|101762|101903|101672|101507	4.9E-4	HP:0001297	0.1492544565499546
11	2	Monarch Phenotype	Annular pancreas	0.0446	STRA6|RECQL4	105576	102053|102086	5.0E-4	HP:0001734	0.1489312548721665
38	2	KEGG Pathways	Homologous recombination	0.0473	XRCC3|POLD2	105576	101093|101867	0.0048	hsa03440	0.14611659630277532
162	4	WikiPathways	EGF/EGFR signaling pathway	0.0493	AURKA|PRKCD|RAP1A|HRAS	105576	101195|101741|101777|101198	8.8E-4	WP437	0.14413339226067323
