# Supplementary figures and images for: Isoform switching as a key mechanism in chemotherapy resistance in triple-negative breast cancer
Source: Research Square preprint supplement (doi:10.21203/rs.3.rs-7041176/v1), 2025-07-23

Figure 2.

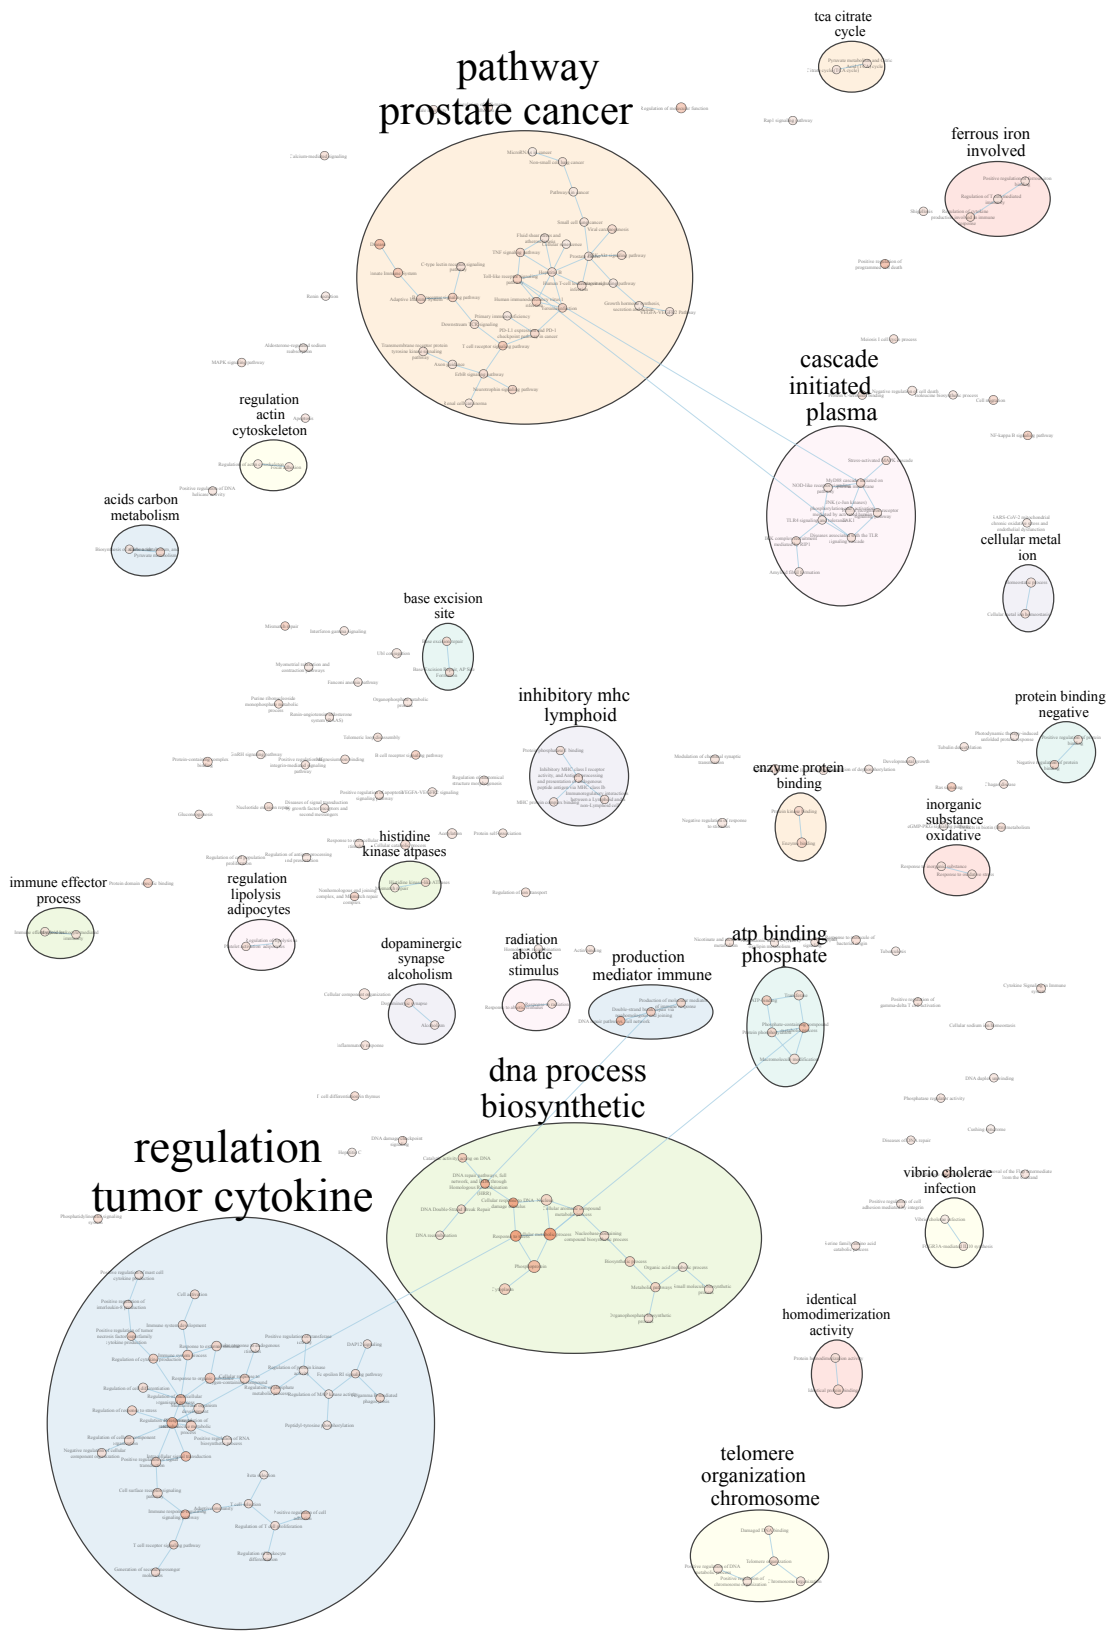

Supplement: Supplementary file 1 [file 2471ba0292783d9763a68790.pdf]

Figure 3.

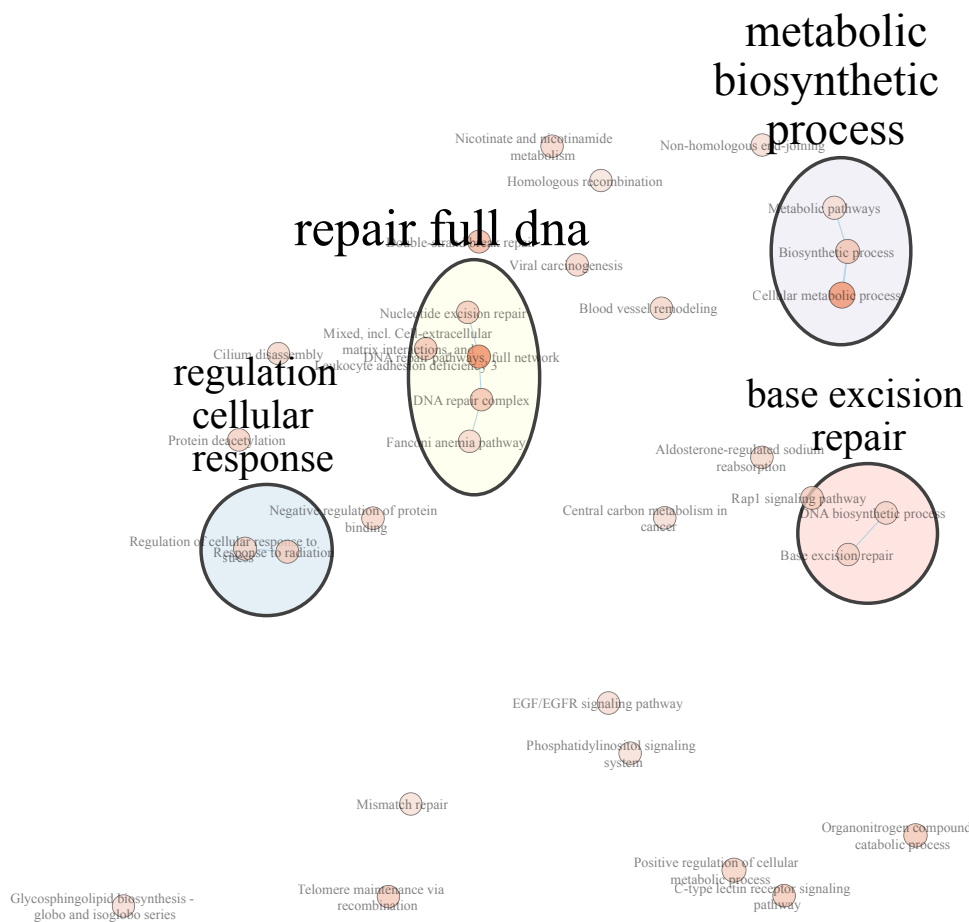

Supplement: Supplementary file 2 [file 65b775af1506aecbe4524fae.pdf]
